# Supplementary material for: Anharmonicity and vibrational Stark fields in phosphinic acid dimers
Source: Royal Society of Chemistry journal article supplement (doi:10.1039/d4cp03394a), 2025-01-01
Supplement: d4cp03394a1.pdf [file d4cp03394a1.pdf]

**Electronic supplementary information -1 for**  
**Anharmonicity and Vibrational Stark Fields in Phosphinic**  
**Acid Dimers**

Manjusha Boda,<sup>†</sup> Arzoo and G. Naresh Patwari\*

Department of Chemistry, Indian Institute of Technology Bombay, Mumbai 400076,  
India. Email: naresh@chem.iitb.ac.in

<sup>†</sup>Present address: School of Chemistry, University of Hyderabad, Hyderabad 500046,  
India

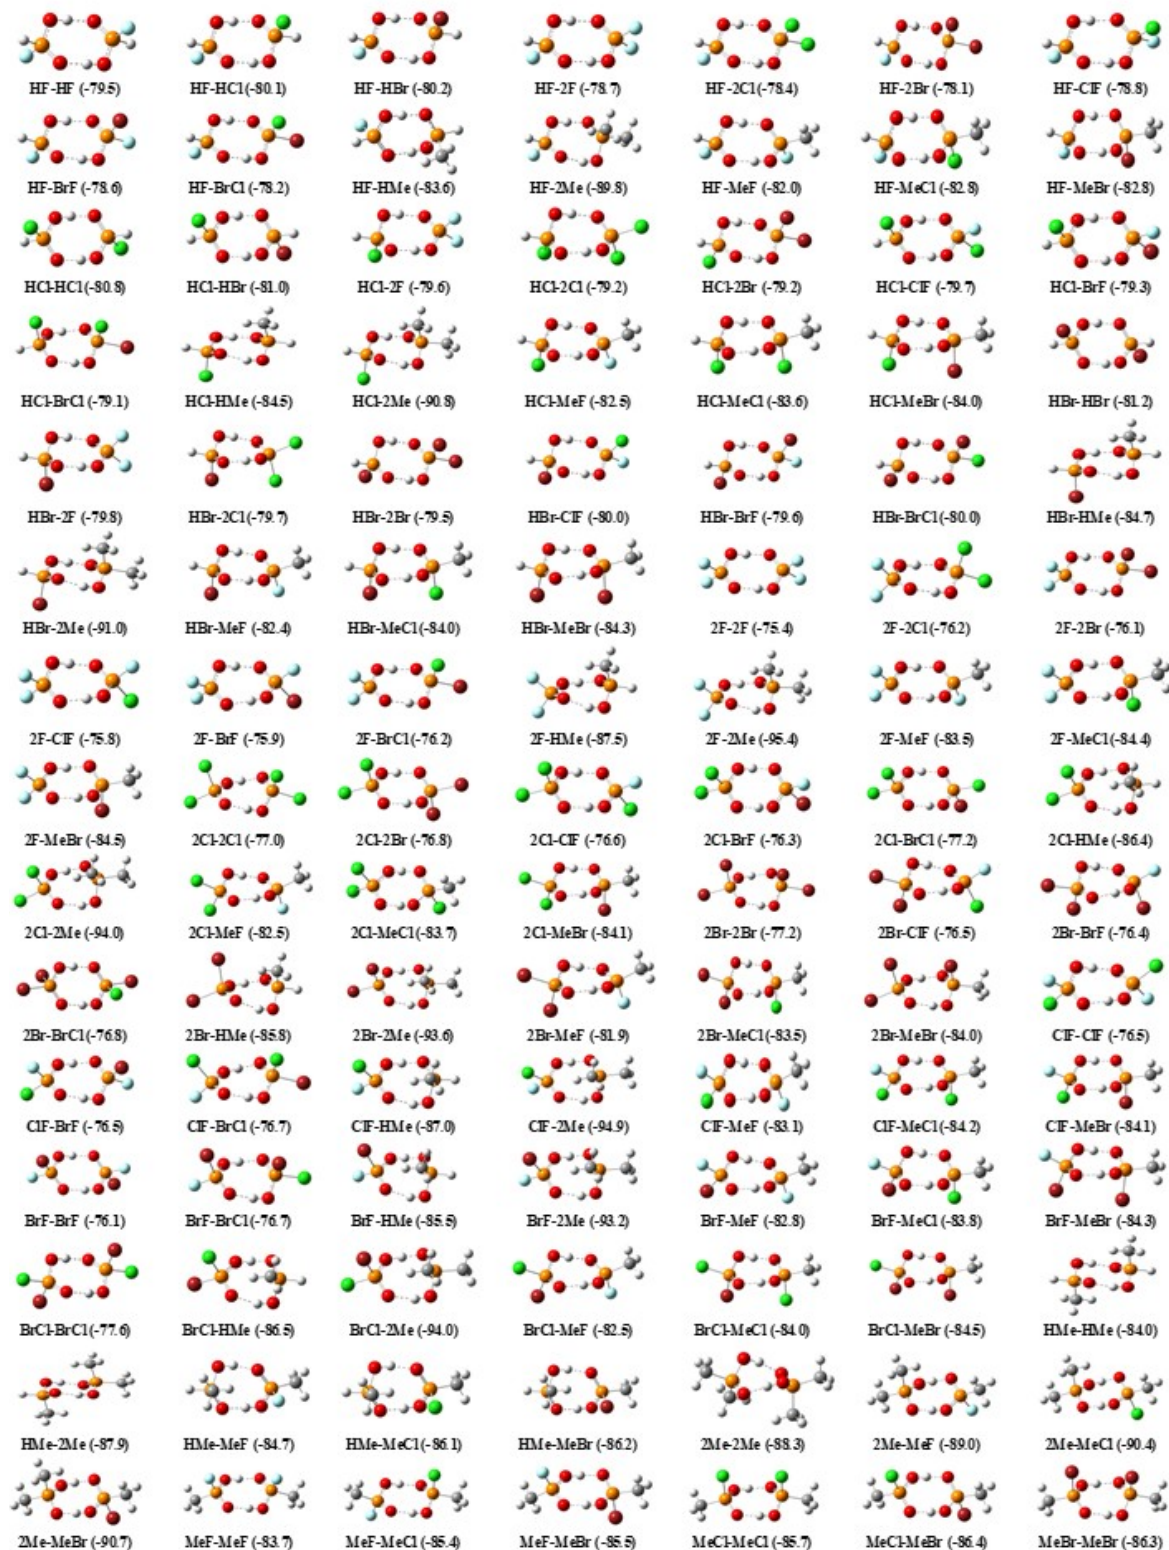

**Figure S1** Optimized Structures of all possible phosphinic acid dimers with -R groups as -H, -Me, -F, -Cl, -Br with their ZPE and BSSE corrected stabilization energies (in  $\text{kJ mol}^{-1}$ ) calculated at the MP2/aug-cc-pVDZ level of theory shown in the parentheses. For the sake of convenience, the different possible dimers formed by different combinations of the monomeric units will be labelled with respect to the R groups as  $R_1R_2$ , i.e., dimer formed by combination of PA-2H and PA-BrCl will be labelled as (2H-

---

BrCl).

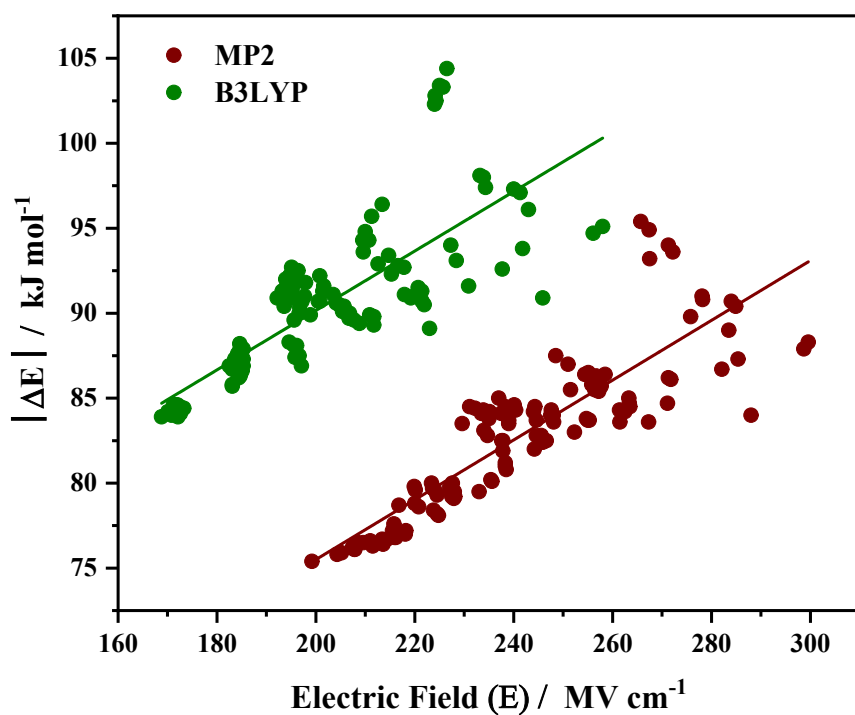

**Figure S2.** Plots of stabilization energy of various phosphinic acid dimer against the corresponding total electric field calculated at MP2 (brown circles) and B3LYP-D3 (green circles). The straight-lines are linear least-square fits to the data.

---

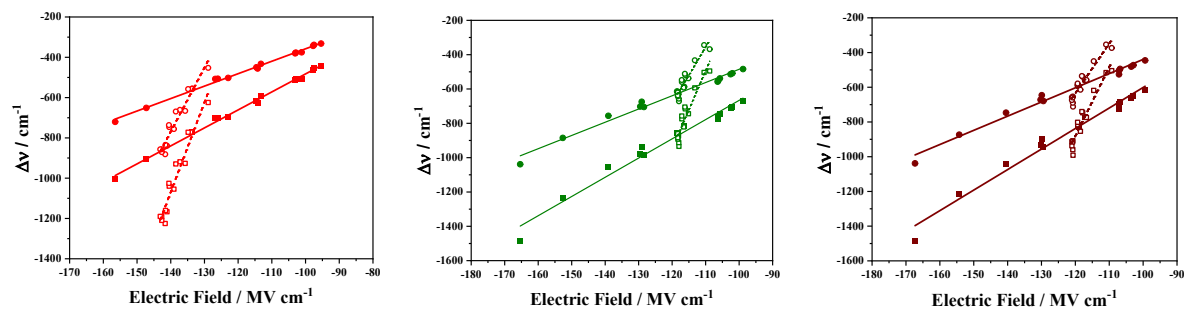

**2H**

**HF**

**HCl**

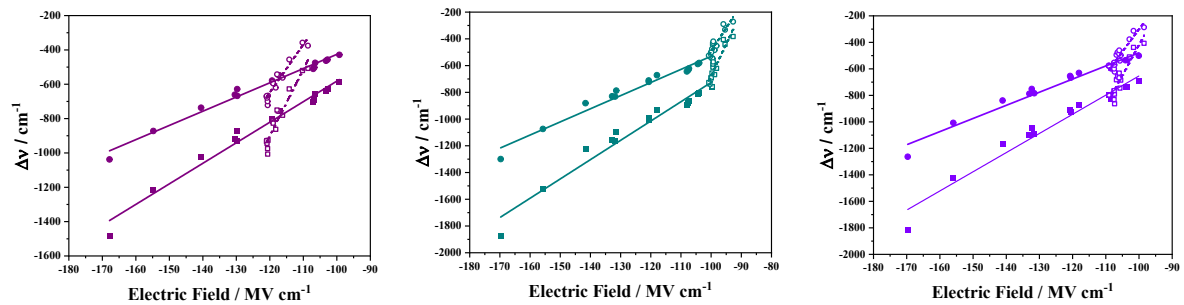

**HBr**

**2F**

**2Cl**

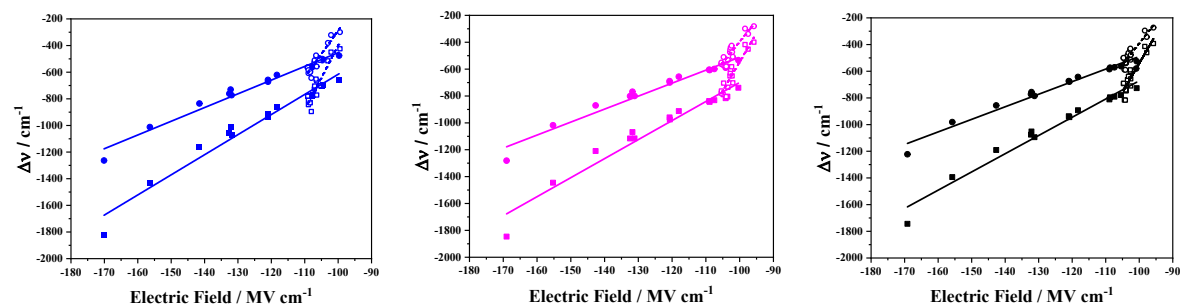

**2Br**

**ClF**

**BrF**

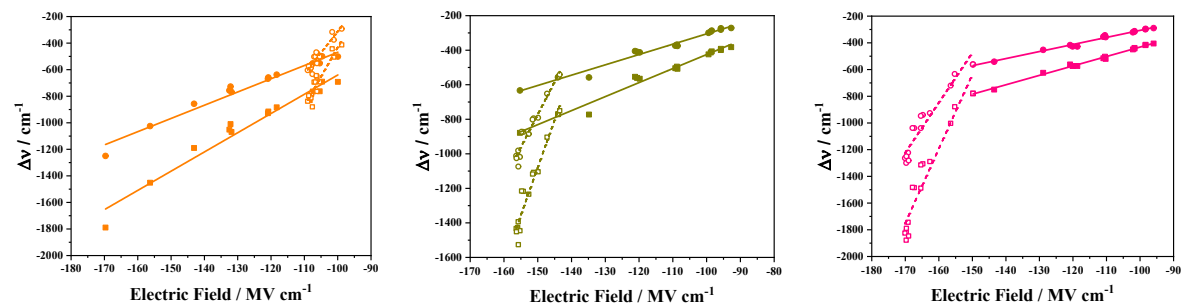

**BrCl**

**HMe**

**2Me**

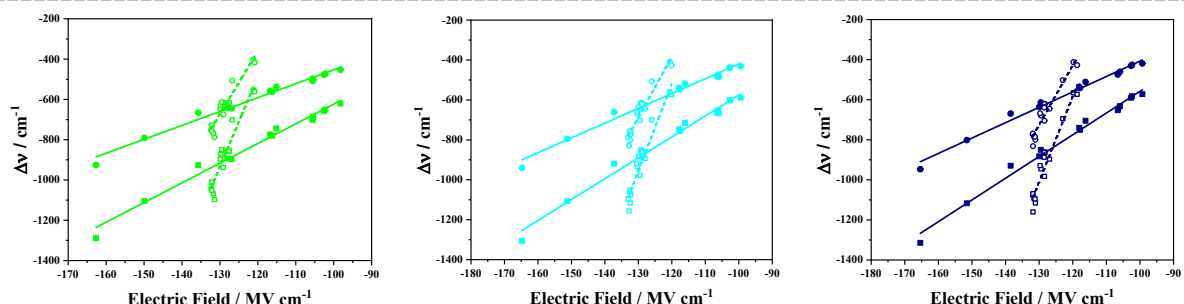

**MeF**

**MeCl**

**MeBr**

---

**Figure S3.** Plots of the red-shifts in the O–H (squares) and O–D (circles) stretching frequencies against the corresponding Stark fields in the dimers of 2H, HF, HCl, HBr, 2F, 2Cl, 2Br, ClF, BrF, BrCl, HMe, 2Me, MeF, MeCl, MeBr calculated at MP2/aug-cc-pVDZ level of theory. For the sake of convenience, the different possible dimers formed by different combinations of the monomeric units will be labelled with respect to the R groups as  $R_1R_2$ , for instance dimer formed by combination of PA-2H and PA-BrCl will be labelled as 2H-BrCl. The solid symbols represent the shifts in the O–H/O–D stretching frequencies of acid due to change in the substituent on the dimerizing partner, while open symbols represent the shifts in the O–H/O–D stretching frequencies of the other phosphinic acids due to their dimerization with acid. The straight-lines are linear least-square fits to the data points and the slopes of these straight lines are called Stark tuning rates ( $\Delta\vec{\mu}$ ).

---

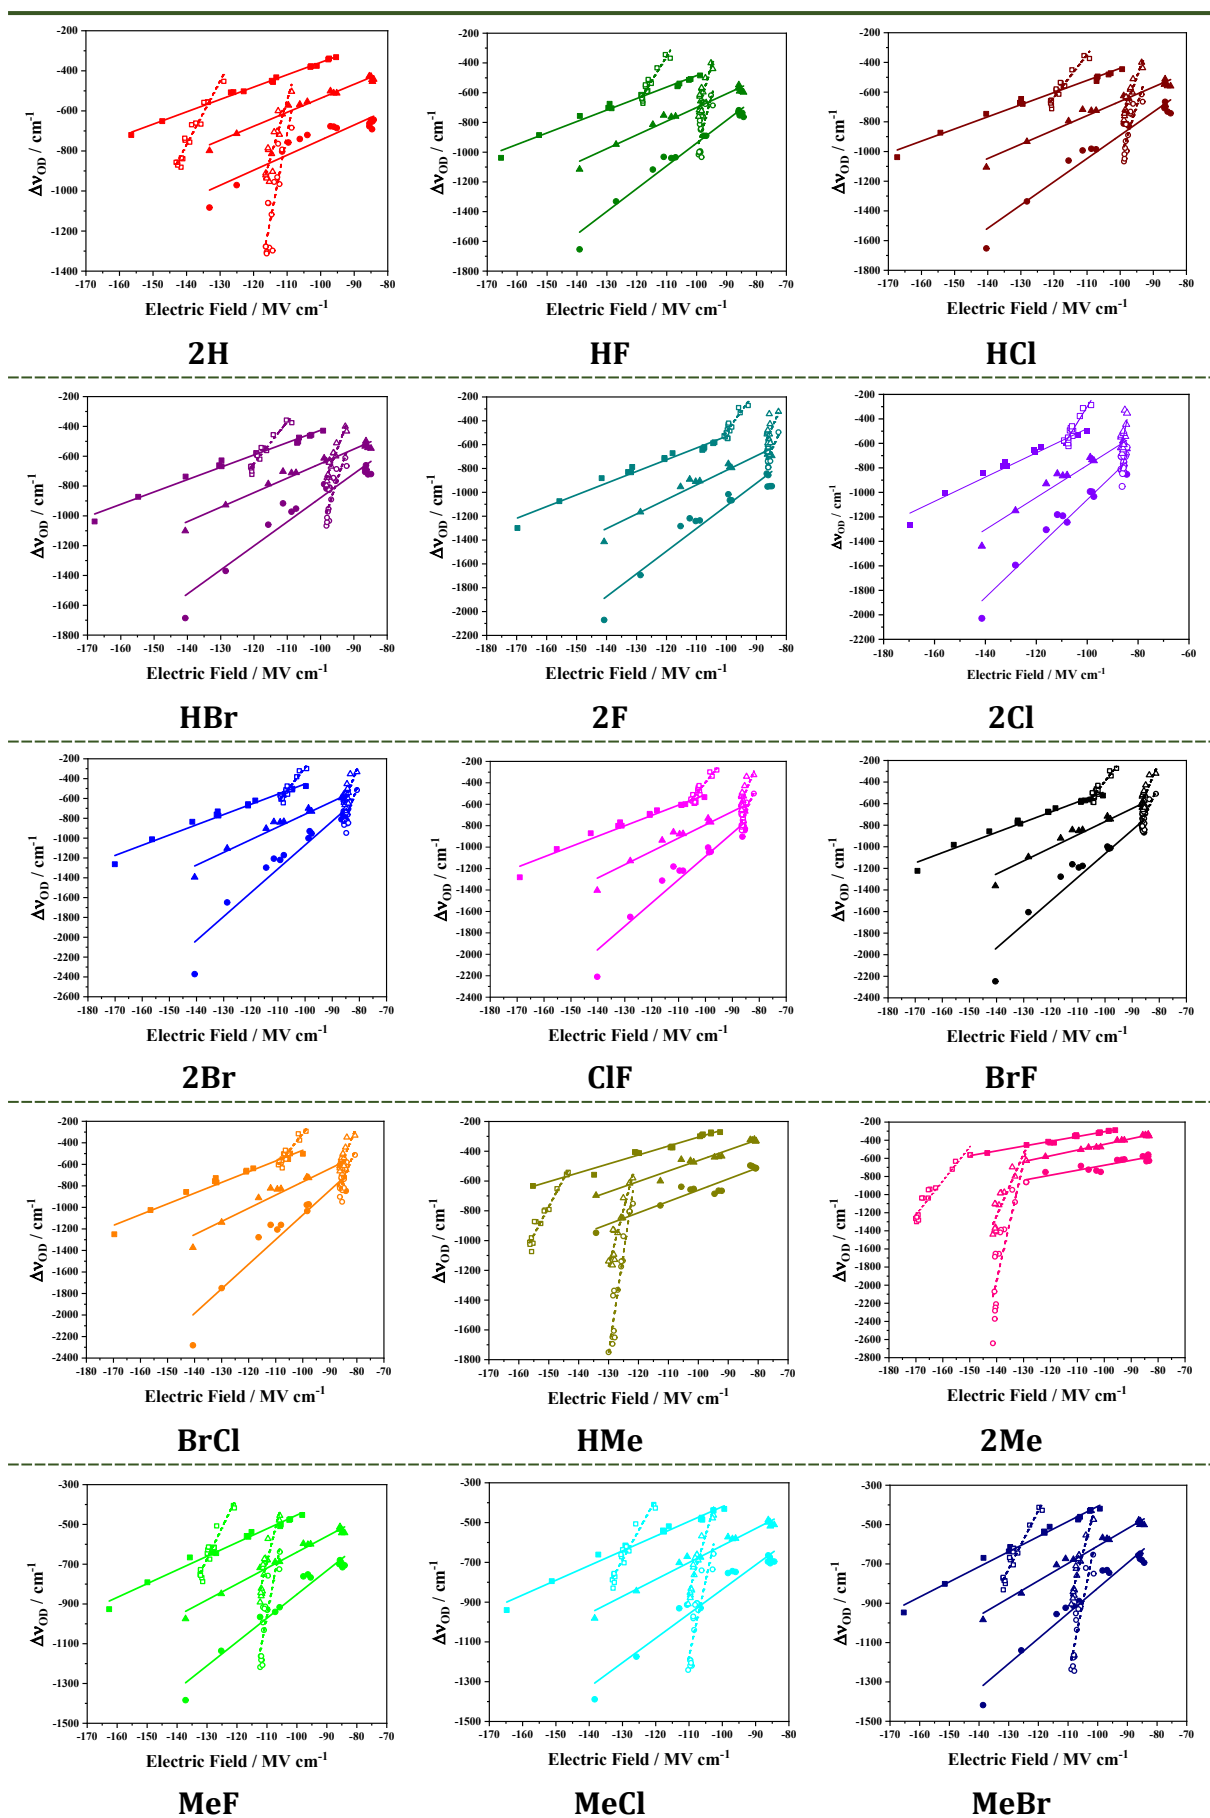

Figure S4. Plots of the red-shifts in the O-D stretching frequencies against the

---

corresponding Stark fields in the dimers of 2H, HF, HCl, HBr, 2F, 2Cl, 2Br, ClF, BrF, BrCl, HMe, 2Me, MeF, MeCl, MeBr. For the sake of convenience, the different possible dimers formed by different combinations of the monomeric units will be labelled with respect to the R groups as  $R_1R_2$ , i.e., dimer formed by combination of PA-2H and PA-BrCl will be labelled as (2H-BrCl). In each case the squares, circles and triangles represent harmonic MP2, harmonic B3LYP-D3, and anharmonic B3LYP-D3 frequency shifts calculated with aug/cc-pVDZ basis set, respectively. The solid symbols represent the shifts in the O-H/O-D stretching frequencies of acid due to change in the substituent on the dimerizing partner, while open symbols represent the shifts in the O-H/O-D stretching frequencies of the other phosphinic acids due to their dimerization with acid. The straight-lines are linear least-square fits to the data points and the slopes of these straight lines are called Stark tuning rates ( $\Delta\vec{\mu}$ ).

---

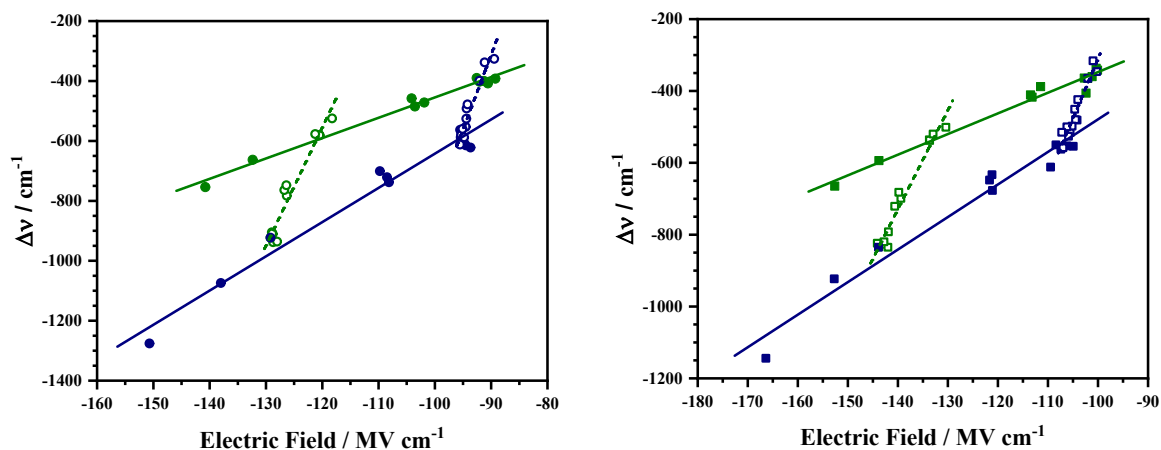

**Figure S5.** (Left) Plots of the red-shifts in the O–D stretching frequencies against the corresponding Stark fields in the dimers of parent phosphinic acid (2H, green circles) and ClF phosphinic acid (ClF, blue circles) calculated at B3LYP/PVTZ level of theory. (Right) Plots of the red-shifts in the O–D stretching frequencies against the corresponding Stark fields in the dimers of parent phosphinic acid (2H, green squares) and ClF phosphinic acid (ClF, blue squares) calculated at B2GP-PLYP/def2-TZVP/C level of theory. The solid symbols represent the shifts in the O–D stretching frequencies of acid due to change in the substituent on the dimerizing partner, while open symbols represent the shifts in the O–D stretching frequencies of the other phosphinic acids due to their dimerization with acid. The straight-lines are linear least-square fits to the data points and the slopes represent Stark tuning rates ( $\Delta\vec{\mu}$ ).



**Table S1.** ZPE corrected dimerization energies (kJ mol<sup>-1</sup>) and total electric field (MV cm<sup>-1</sup>) (*in italics*) for various phosphinic acid dimers calculated at MP2/aug-cc-pVDZ level of theory. For the sake of convenience, the different possible dimers formed by different combinations of the monomeric units will be labelled with respect to the R groups as R<sub>1</sub>R<sub>2</sub>, i.e., dimer formed by combination of PA-2H and PA-BrCl will be labelled as (2H-BrCl).

|      | 2H            | HF            | HCl           | HBr           | 2F            | 2Cl           | 2Br           | ClF           | BrF           | BrCl          | HMe           | 2Me           | MeF           | MeCl          | MeBr          |
|------|---------------|---------------|---------------|---------------|---------------|---------------|---------------|---------------|---------------|---------------|---------------|---------------|---------------|---------------|---------------|
| 2H   | -83.6         | -83.0         | -83.7         | -83.8         | -85.0         | -84.2         | -83.7         | -84.6         | -84.3         | -84.5         | -86.7         | -87.3         | -84.2         | -85.0         | -84.3         |
|      | <i>-267.3</i> | <i>-252.3</i> | <i>-255.0</i> | <i>-254.7</i> | <i>-237.0</i> | <i>-244.0</i> | <i>-244.6</i> | <i>-240.1</i> | <i>-240.4</i> | <i>-244.3</i> | <i>-282.1</i> | <i>-285.4</i> | <i>-262.5</i> | <i>-263.3</i> | <i>-261.4</i> |
| HF   |               | -79.5         | -80.1         | -80.2         | -78.7         | -78.4         | -78.1         | -78.8         | -78.6         | -78.2         | -83.6         | -89.8         | -82.0         | -82.8         | -82.8         |
|      |               | <i>-233.0</i> | <i>-235.6</i> | <i>-235.4</i> | <i>-216.8</i> | <i>-223.8</i> | <i>-224.8</i> | <i>-220.0</i> | <i>-220.8</i> | <i>-224.5</i> | <i>-261.5</i> | <i>-275.8</i> | <i>-244.2</i> | <i>-245.6</i> | <i>-244.6</i> |
| HCl  |               |               | -80.8         | -81.0         | -79.6         | -79.2         | -79.2         | -79.7         | -79.3         | -79.1         | -84.5         | -90.8         | -82.5         | -83.6         | -84.0         |
|      |               |               | <i>-238.5</i> | <i>-238.3</i> | <i>-220.1</i> | <i>-227.5</i> | <i>-228.1</i> | <i>-223.6</i> | <i>-224.5</i> | <i>-227.9</i> | <i>-263.5</i> | <i>-278.2</i> | <i>-246.6</i> | <i>-248.1</i> | <i>-247.5</i> |
| HBr  |               |               |               | -81.2         | -79.8         | -79.7         | -79.5         | -80.0         | -79.6         | -80.0         | -84.7         | -91.0         | -82.4         | -84.0         | -84.3         |
|      |               |               |               | <i>-238.3</i> | <i>-219.9</i> | <i>-227.0</i> | <i>-228.0</i> | <i>-223.4</i> | <i>-224.0</i> | <i>-227.6</i> | <i>-263.4</i> | <i>-278.1</i> | <i>-245.9</i> | <i>-248.0</i> | <i>-247.6</i> |
| 2F   |               |               |               |               | -75.4         | -76.2         | -76.1         | -75.8         | -75.9         | -76.2         | -87.5         | -95.4         | -83.5         | -84.4         | -84.5         |
|      |               |               |               |               | <i>-199.2</i> | <i>-207.4</i> | <i>-207.8</i> | <i>-204.3</i> | <i>-205.2</i> | <i>-207.5</i> | <i>-248.5</i> | <i>-265.7</i> | <i>-229.6</i> | <i>-232.2</i> | <i>-231.1</i> |
| 2Cl  |               |               |               |               |               | -77.0         | -76.8         | -76.6         | -76.3         | -77.2         | -86.4         | -94.0         | -82.5         | -83.7         | -84.1         |
|      |               |               |               |               |               | <i>-218.1</i> | <i>-215.9</i> | <i>-211.0</i> | <i>-211.5</i> | <i>-215.5</i> | <i>-254.4</i> | <i>-271.3</i> | <i>-237.8</i> | <i>-239.0</i> | <i>-237.5</i> |
| 2Br  |               |               |               |               |               |               | -77.2         | -76.5         | -76.4         | -76.8         | -85.8         | -93.6         | -81.9         | -83.5         | -84.0         |
|      |               |               |               |               |               |               | <i>-218.2</i> | <i>-213.6</i> | <i>-213.6</i> | <i>-216.2</i> | <i>-255.8</i> | <i>-272.2</i> | <i>-237.8</i> | <i>-239.0</i> | <i>-238.5</i> |
| ClF  |               |               |               |               |               |               |               | -76.5         | -76.5         | -76.7         | -87.0         | -94.9         | -83.1         | -84.2         | -84.1         |
|      |               |               |               |               |               |               |               | <i>-208.5</i> | <i>-209.6</i> | <i>-214.4</i> | <i>-251.0</i> | <i>-267.4</i> | <i>-234.0</i> | <i>-235.1</i> | <i>-233.5</i> |
| BrF  |               |               |               |               |               |               |               |               | -76.1         | -76.7         | -85.5         | -93.2         | -82.8         | -83.8         | -84.3         |
|      |               |               |               |               |               |               |               |               | <i>-207.9</i> | <i>-213.4</i> | <i>-251.5</i> | <i>-267.5</i> | <i>-234.7</i> | <i>-235.0</i> | <i>-233.9</i> |
| BrCl |               |               |               |               |               |               |               |               |               | -77.6         | -86.5         | -94.0         | -82.5         | -84.0         | -84.5         |
|      |               |               |               |               |               |               |               |               |               | <i>-215.8</i> | <i>-255.1</i> | <i>-271.3</i> | <i>-237.6</i> | <i>-238.7</i> | <i>-238.3</i> |
| HMe  |               |               |               |               |               |               |               |               |               |               | -84.0         | -87.9         | -84.7         | -86.1         | -86.2         |
|      |               |               |               |               |               |               |               |               |               |               | <i>-288.0</i> | <i>-298.7</i> | <i>-271.1</i> | <i>-271.8</i> | <i>-271.3</i> |
| 2Me  |               |               |               |               |               |               |               |               |               |               |               | -88.3         | -89.0         | -90.4         | -90.7         |
|      |               |               |               |               |               |               |               |               |               |               |               | <i>-299.6</i> | <i>-283.5</i> | <i>-284.9</i> | <i>-284.0</i> |
| MeF  |               |               |               |               |               |               |               |               |               |               |               |               | -83.7         | -85.4         | -85.5         |
|      |               |               |               |               |               |               |               |               |               |               |               |               | <i>-255.3</i> | <i>-257.2</i> | <i>-256.4</i> |
| MeCl |               |               |               |               |               |               |               |               |               |               |               |               |               | -85.7         | -86.4         |
|      |               |               |               |               |               |               |               |               |               |               |               |               |               | <i>-257.7</i> | <i>-258.5</i> |
| MeBr |               |               |               |               |               |               |               |               |               |               |               |               |               |               | -86.3         |
|      |               |               |               |               |               |               |               |               |               |               |               |               |               |               | <i>-256.7</i> |

**Table S2.** ZPE corrected dimerization energies (kJ mol<sup>-1</sup>) and total electric field (MV cm<sup>-1</sup>) (*in italics*) for various phosphinic acid dimers calculated at B3LYP-D3/aug-cc-pVDZ level of theory. For the sake of convenience, the different possible dimers formed by different combinations of the monomeric units will be labelled with respect to the R groups as R<sub>1</sub>R<sub>2</sub>, i.e., dimer formed by combination of PA-2H and PA-BrCl will be labelled as (2H-BrCl).

|      | 2H            | HF            | HCl           | HBr           | 2F            | 2Cl           | 2Br           | ClF           | BrF           | BrCl          | HMe           | 2Me           | MeF           | MeCl          | MeBr          |
|------|---------------|---------------|---------------|---------------|---------------|---------------|---------------|---------------|---------------|---------------|---------------|---------------|---------------|---------------|---------------|
| 2H   | -89.1         | -89.3         | -89.8         | -89.9         | -92.2         | -90.7         | -89.9         | -91.6         | -91.3         | -90.7         | -92.6         | -93.8         | -90.5         | -90.9         | -91.1         |
|      | <b>-223.0</b> | <b>-211.7</b> | <b>-211.7</b> | <b>-210.9</b> | <b>-200.8</b> | <b>-200.8</b> | <b>-198.9</b> | <b>-201.6</b> | <b>-201.4</b> | <b>-200.5</b> | <b>-237.7</b> | <b>-241.8</b> | <b>-221.9</b> | <b>-219.2</b> | <b>-217.9</b> |
| HF   |               | -86.9         | -87.5         | -87.4         | -86.9         | -86.2         | -85.7         | -86.6         | -86.3         | -85.8         | -90.7         | -97.4         | -89.4         | -90.0         | -90.1         |
|      |               | <b>-197.1</b> | <b>-196.6</b> | <b>-195.8</b> | <b>-185.3</b> | <b>-184.4</b> | <b>-183.1</b> | <b>-185.1</b> | <b>-184.7</b> | <b>-183.1</b> | <b>-221.5</b> | <b>-234.3</b> | <b>-208.8</b> | <b>-206.8</b> | <b>-205.4</b> |
| HCl  |               |               | -88.1         | -88.1         | -87.9         | -86.9         | -86.7         | -87.3         | -87.1         | -86.9         | -91.3         | -98.0         | -89.6         | -90.4         | -90.6         |
|      |               |               | <b>-196.1</b> | <b>-195.6</b> | <b>-185.3</b> | <b>-184.7</b> | <b>-183.1</b> | <b>-185.3</b> | <b>-185.0</b> | <b>-184.2</b> | <b>-221.4</b> | <b>-233.9</b> | <b>-207.7</b> | <b>-205.7</b> | <b>-204.1</b> |
| HBr  |               |               |               | -88.3         | -88.2         | -87.2         | -86.9         | -87.9         | -87.6         | -87.3         | -91.5         | -98.1         | -89.7         | -90.5         | -91.1         |
|      |               |               |               | <b>-194.6</b> | <b>-184.6</b> | <b>-184.0</b> | <b>-182.5</b> | <b>-184.7</b> | <b>-184.2</b> | <b>-183.6</b> | <b>-220.7</b> | <b>-233.2</b> | <b>-206.7</b> | <b>-204.7</b> | <b>-203.5</b> |
| 2F   |               |               |               |               | -83.9         | -84.3         | -84.1         | -84.1         | -84.1         | -84.0         | -95.7         | -104.4        | -91.8         | -92.5         | -92.7         |
|      |               |               |               |               | <b>-172.1</b> | <b>-172.2</b> | <b>-170.6</b> | <b>-172.6</b> | <b>-172.2</b> | <b>-170.8</b> | <b>-211.3</b> | <b>-226.5</b> | <b>-197.9</b> | <b>-196.4</b> | <b>-195.1</b> |
| 2Cl  |               |               |               |               |               | -84.4         | -84.2         | -84.6         | -84.4         | -84.6         | -96.4         | -103.3        | -90.4         | -91.1         | -91.4         |
|      |               |               |               |               |               | <b>-173.3</b> | <b>-170.1</b> | <b>-171.6</b> | <b>-171.6</b> | <b>-171.2</b> | <b>-213.4</b> | <b>-225.7</b> | <b>-196.7</b> | <b>-195.2</b> | <b>-193.7</b> |
| 2Br  |               |               |               |               |               |               | -84.2         | -84.4         | -84.4         | -83.9         | -93.6         | -102.3        | -89.6         | -90.4         | -90.9         |
|      |               |               |               |               |               |               | <b>-170.9</b> | <b>-171.9</b> | <b>-171.7</b> | <b>-168.8</b> | <b>-209.6</b> | <b>-224.0</b> | <b>-195.6</b> | <b>-193.6</b> | <b>-192.2</b> |
| ClF  |               |               |               |               |               |               |               | -84.6         | -84.5         | -84.3         | -94.8         | -103.4        | -91.0         | -91.9         | -92.2         |
|      |               |               |               |               |               |               |               | <b>-172.0</b> | <b>-172.0</b> | <b>-172.5</b> | <b>-210.0</b> | <b>-225.0</b> | <b>-197.7</b> | <b>-195.9</b> | <b>-194.7</b> |
| BrF  |               |               |               |               |               |               |               |               | -84.3         | -84.5         | -94.3         | -102.8        | -90.7         | -91.6         | -92.0         |
|      |               |               |               |               |               |               |               |               | <b>-172.1</b> | <b>-172.5</b> | <b>-209.5</b> | <b>-224.1</b> | <b>-197.2</b> | <b>-195.4</b> | <b>-193.9</b> |
| BrCl |               |               |               |               |               |               |               |               |               | -84.4         | -94.3         | -102.5        | -90.0         | -90.9         | -91.3         |
|      |               |               |               |               |               |               |               |               |               | <b>-171.1</b> | <b>-210.7</b> | <b>-224.3</b> | <b>-196.6</b> | <b>-194.6</b> | <b>-193.2</b> |
| HMe  |               |               |               |               |               |               |               |               |               |               | -90.9         | -94.7         | -91.6         | -93.1         | -94.0         |
|      |               |               |               |               |               |               |               |               |               |               | <b>-245.9</b> | <b>-256.1</b> | <b>-230.9</b> | <b>-228.4</b> | <b>-227.3</b> |
| 2Me  |               |               |               |               |               |               |               |               |               |               |               | -95.1         | -96.1         | -97.1         | -97.3         |
|      |               |               |               |               |               |               |               |               |               |               |               | <b>-258.0</b> | <b>-243.0</b> | <b>-241.3</b> | <b>-240.0</b> |
| MeF  |               |               |               |               |               |               |               |               |               |               |               |               | -91.0         | -92.7         | -92.8         |
|      |               |               |               |               |               |               |               |               |               |               |               |               | <b>-219.8</b> | <b>-217.8</b> | <b>-216.6</b> |
| MeCl |               |               |               |               |               |               |               |               |               |               |               |               |               | -92.3         | -93.4         |
|      |               |               |               |               |               |               |               |               |               |               |               |               |               | <b>-215.3</b> | <b>-214.7</b> |
| MeBr |               |               |               |               |               |               |               |               |               |               |               |               |               |               | -92.9         |
|      |               |               |               |               |               |               |               |               |               |               |               |               |               |               | <b>-212.6</b> |

**Table S3.** The harmonic vibrational frequencies (in  $\text{cm}^{-1}$ ) of the donor O-H stretch along with its vibrational shift (in  $\text{cm}^{-1}$ ) with respect to O-H stretch of the corresponding phosphinic acid monomer and the electric field (in  $\text{MV cm}^{-1}$ ) along the bond calculated at MP2/aug-cc-pVDZ level of theory for the two cases namely, the effect on acid due to partner and the effect on partner due to acid respectively. For the sake of convenience, the different possible dimers formed by different combinations of the monomeric units will be labelled with respect to the R groups as  $R_1R_2$ , i.e., dimer formed by combination of PA-2H and PA-BrCl will be labelled as (2H-BrCl).

| Dimer   | $\nu_{\text{O-H}}$       | $\Delta\nu_{\text{O-H}}$ | Field   | $\nu_{\text{O-H}}$       | $\Delta\nu_{\text{O-H}}$ | Field   |
|---------|--------------------------|--------------------------|---------|--------------------------|--------------------------|---------|
|         | On PA-2H due to partner  |                          |         | On partner due to PA-2H  |                          |         |
| 2H-2H   | 3018                     | -772                     | -133.63 | 3018                     | -772                     | -133.64 |
| 2H-HF   | 3196                     | -593                     | -113.23 | 2731                     | -1055                    | -139.04 |
| 2H-HCl  | 3171                     | -618                     | -114.57 | 2730                     | -1040                    | -140.46 |
| 2H-HBr  | 3162                     | -627                     | -114.21 | 2742                     | -1026                    | -140.54 |
| 2H-2F   | 3348                     | -442                     | -95.39  | 2573                     | -1225                    | -141.63 |
| 2H-2Cl  | 3280                     | -510                     | -102.88 | 2587                     | -1166                    | -141.11 |
| 2H-2Br  | 3274                     | -515                     | -103.07 | 2580                     | -1160                    | -141.54 |
| 2H-ClF  | 3338                     | -451                     | -97.50  | 2568                     | -1209                    | -142.65 |
| 2H-BrF  | 3329                     | -461                     | -97.75  | 2582                     | -1191                    | -142.68 |
| 2H-BrCl | 3284                     | -506                     | -101.16 | 2557                     | -1190                    | -143.11 |
| 2H-HMe  | 2885                     | -904                     | -147.23 | 3019                     | -773                     | -134.82 |
| 2H-2Me  | 2787                     | -1003                    | -156.48 | 3165                     | -625                     | -128.88 |
| 2H-MeF  | 3089                     | -701                     | -126.78 | 2862                     | -927                     | -135.71 |
| 2H-MeCl | 3089                     | -700                     | -126.02 | 2856                     | -919                     | -137.25 |
| 2H-MeBr | 3095                     | -695                     | -122.95 | 2842                     | -929                     | -138.50 |
|         | On PA-HF due to partner  |                          |         | On partner due to PA-HF  |                          |         |
| HF-HF   | 2971                     | -815                     | -116.43 | 2964                     | -821                     | -116.56 |
| HF-2H   | 2731                     | -1055                    | -139.04 | 3196                     | -593                     | -113.23 |
| HF-HCl  | 2932                     | -854                     | -118.51 | 2996                     | -774                     | -117.10 |
| HF-HBr  | 2923                     | -862                     | -118.24 | 3010                     | -758                     | -117.13 |
| HF-2F   | 3118                     | -668                     | -98.84  | 2864                     | -934                     | -117.96 |
| HF-2Cl  | 3040                     | -745                     | -105.75 | 2880                     | -874                     | -118.09 |
| HF-2Br  | 3014                     | -772                     | -106.42 | 2881                     | -860                     | -118.35 |
| HF-ClF  | 3083                     | -702                     | -102.03 | 2865                     | -912                     | -118.02 |
| HF-BrF  | 3075                     | -710                     | -102.55 | 2880                     | -893                     | -118.28 |
| HF-BrCl | 3021                     | -764                     | -106.25 | 2864                     | -884                     | -118.30 |
| HF-HMe  | 2552                     | -1234                    | -152.66 | 3297                     | -495                     | -108.80 |
| HF-2Me  | 2298                     | -1488                    | -165.37 | 3286                     | -504                     | -110.46 |
| HF-MeF  | 2847                     | -938                     | -129.09 | 3044                     | -744                     | -115.13 |
| HF-MeCl | 2807                     | -978                     | -129.52 | 3059                     | -716                     | -116.08 |
| HF-MeBr | 2803                     | -983                     | -128.42 | 3066                     | -705                     | -116.20 |
|         | On PA-HCl due to partner |                          |         | On partner due to PA-HCl |                          |         |
| HCl-HCl | 2953                     | -816                     | -119.26 | 2952                     | -818                     | -119.29 |
| HCl-2H  | 2730                     | -1040                    | -140.46 | 3171                     | -618                     | -114.57 |
| HCl-HF  | 2996                     | -774                     | -117.10 | 2932                     | -854                     | -118.51 |
| HCl-HBr | 2943                     | -827                     | -119.01 | 2966                     | -802                     | -119.33 |
| HCl-2F  | 3157                     | -612                     | -99.41  | 2806                     | -992                     | -120.68 |

|          |                          |       |         |                          |       |         |
|----------|--------------------------|-------|---------|--------------------------|-------|---------|
| HCl-2Cl  | 3087                     | -682  | -106.80 | 2846                     | -908  | -120.74 |
| HCl-2Br  | 3044                     | -726  | -107.12 | 2827                     | -913  | -121.02 |
| HCl-ClF  | 3119                     | -651  | -102.87 | 2818                     | -959  | -120.74 |
| HCl-BrF  | 3106                     | -664  | -103.51 | 2835                     | -937  | -121.02 |
| HCl-BrCl | 3076                     | -694  | -107.07 | 2833                     | -915  | -120.81 |
| HCl-HMe  | 2553                     | -1217 | -154.28 | 3287                     | -505  | -109.26 |
| HCl-2Me  | 2286                     | -1484 | -167.32 | 3274                     | -516  | -110.93 |
| HCl-MeF  | 2873                     | -896  | -129.90 | 3014                     | -774  | -116.74 |
| HCl-MeCl | 2835                     | -935  | -130.26 | 3028                     | -747  | -117.83 |
| HCl-MeBr | 2825                     | -945  | -129.43 | 3031                     | -740  | -118.08 |
|          | On PA-HBr due to partner |       |         | On partner due to PA-HBr |       |         |
| HBr-HBr  | 2952                     | -816  | -119.16 | 2954                     | -814  | -119.14 |
| HBr-2H   | 2742                     | -1026 | -140.54 | 3162                     | -627  | -114.21 |
| HBr-HF   | 3010                     | -758  | -117.13 | 2923                     | -862  | -118.24 |
| HBr-HCl  | 2966                     | -802  | -119.33 | 2943                     | -827  | -119.01 |
| HBr-2F   | 3179                     | -588  | -99.23  | 2791                     | -1007 | -120.64 |
| HBr-2Cl  | 3113                     | -655  | -106.46 | 2827                     | -927  | -120.54 |
| HBr-2Br  | 3063                     | -705  | -107.03 | 2808                     | -933  | -120.99 |
| HBr-ClF  | 3139                     | -628  | -102.77 | 2802                     | -975  | -120.66 |
| HBr-BrF  | 3130                     | -638  | -103.21 | 2828                     | -945  | -120.83 |
| HBr-BrCl | 3075                     | -693  | -106.71 | 2819                     | -928  | -120.92 |
| HBr-HMe  | 2552                     | -1215 | -154.77 | 3284                     | -508  | -108.62 |
| HBr-2Me  | 2285                     | -1482 | -167.86 | 3270                     | -520  | -110.24 |
| HBr-MeF  | 2897                     | -871  | -129.74 | 3008                     | -781  | -116.20 |
| HBr-MeCl | 2849                     | -919  | -130.44 | 3018                     | -756  | -117.52 |
| HBr-MeBr | 2839                     | -929  | -129.72 | 3021                     | -750  | -117.85 |
|          | On PA-2F due to partner  |       |         | On partner due to PA-2F  |       |         |
| 2F-2F    | 3040                     | -758  | -99.59  | 3040                     | -758  | -99.59  |
| 2F-2H    | 2573                     | -1225 | -141.63 | 3348                     | -442  | -95.39  |
| 2F-HF    | 2864                     | -934  | -117.96 | 3118                     | -668  | -98.84  |
| 2F-HCl   | 2806                     | -992  | -120.68 | 3157                     | -612  | -99.41  |
| 2F-HBr   | 2791                     | -1007 | -120.64 | 3179                     | -588  | -99.23  |
| 2F-2Cl   | 2935                     | -864  | -107.35 | 3062                     | -691  | -100.06 |
| 2F-2Br   | 2903                     | -895  | -108.04 | 3085                     | -656  | -99.72  |
| 2F-ClF   | 2993                     | -805  | -103.97 | 3038                     | -739  | -100.37 |
| 2F-BrF   | 2982                     | -816  | -104.42 | 3046                     | -727  | -100.77 |
| 2F-BrCl  | 2918                     | -880  | -107.59 | 3055                     | -692  | -99.95  |
| 2F-HMe   | 2272                     | -1526 | -155.74 | 3409                     | -383  | -92.72  |
| 2F-2Me   | 1920                     | -1878 | -169.73 | 3385                     | -405  | -95.94  |
| 2F-MeF   | 2702                     | -1096 | -131.44 | 3168                     | -621  | -98.21  |
| 2F-MeCl  | 2642                     | -1156 | -132.81 | 3186                     | -589  | -99.42  |
| 2F-MeBr  | 2638                     | -1160 | -131.82 | 3199                     | -572  | -99.28  |
|          | On PA-2Cl due to partner |       |         | On partner due to PA-2Cl |       |         |
| 2Cl-2Cl  | 2956                     | -798  | -109.08 | 2956                     | -798  | -109.07 |
| 2Cl-2H   | 2587                     | -1166 | -141.11 | 3280                     | -510  | -102.88 |
| 2Cl-HF   | 2880                     | -874  | -118.09 | 3040                     | -745  | -105.75 |
| 2Cl-HCl  | 2846                     | -908  | -120.74 | 3087                     | -682  | -106.80 |
| 2Cl-HBr  | 2827                     | -927  | -120.54 | 3113                     | -655  | -106.46 |

|          |                          |       |         |                          |      |         |
|----------|--------------------------|-------|---------|--------------------------|------|---------|
| 2Cl-2F   | 3062                     | -691  | -100.06 | 2935                     | -864 | -107.35 |
| 2Cl-2Br  | 2926                     | -827  | -108.36 | 2973                     | -768 | -107.53 |
| 2Cl-ClF  | 3019                     | -735  | -103.47 | 2946                     | -832 | -107.49 |
| 2Cl-BrF  | 3014                     | -740  | -104.06 | 2982                     | -791 | -107.39 |
| 2Cl-BrCl | 2941                     | -812  | -108.01 | 2983                     | -764 | -107.48 |
| 2Cl-HMe  | 2327                     | -1427 | -155.95 | 3385                     | -407 | -98.48  |
| 2Cl-2Me  | 1940                     | -1814 | -169.70 | 3352                     | -438 | -101.64 |
| 2Cl-MeF  | 2709                     | -1044 | -132.31 | 3103                     | -685 | -105.50 |
| 2Cl-MeCl | 2658                     | -1095 | -133.03 | 3107                     | -667 | -105.98 |
| 2Cl-MeBr | 2662                     | -1092 | -131.55 | 3140                     | -632 | -105.96 |
|          | On PA-2Br due to partner |       |         | On partner due to PA-2Br |      |         |
| 2Br-2Br  | 2960                     | -781  | -109.10 | 2960                     | -781 | -109.10 |
| 2Br-2H   | 2580                     | -1160 | -141.54 | 3274                     | -515 | -103.07 |
| 2Br-HF   | 2881                     | -860  | -118.35 | 3014                     | -772 | -106.42 |
| 2Br-HCl  | 2827                     | -913  | -121.02 | 3044                     | -726 | -107.12 |
| 2Br-HBr  | 2808                     | -933  | -120.99 | 3063                     | -705 | -107.03 |
| 2Br-2F   | 3085                     | -656  | -99.72  | 2903                     | -895 | -108.04 |
| 2Br-2Cl  | 2973                     | -768  | -107.53 | 2926                     | -827 | -108.36 |
| 2Br-ClF  | 3036                     | -704  | -104.73 | 2934                     | -844 | -108.88 |
| 2Br-BrF  | 3048                     | -693  | -104.68 | 2961                     | -811 | -108.89 |
| 2Br-BrCl | 2960                     | -781  | -107.86 | 2918                     | -830 | -108.37 |
| 2Br-HMe  | 2308                     | -1433 | -156.38 | 3367                     | -424 | -99.44  |
| 2Br-2Me  | 1916                     | -1825 | -170.10 | 3340                     | -450 | -102.13 |
| 2Br-MeF  | 2727                     | -1014 | -132.18 | 3086                     | -702 | -105.58 |
| 2Br-MeCl | 2682                     | -1059 | -132.59 | 3110                     | -665 | -106.44 |
| 2Br-MeBr | 2666                     | -1075 | -131.90 | 3119                     | -652 | -106.60 |
|          | On PA-ClF due to partner |       |         | On partner due to PA-ClF |      |         |
| ClF-ClF  | 2972                     | -805  | -103.63 | 2987                     | -790 | -104.88 |
| ClF-2H   | 2568                     | -1209 | -142.65 | 3338                     | -451 | -97.50  |
| ClF-HF   | 2865                     | -912  | -118.02 | 3083                     | -702 | -102.03 |
| ClF-HCl  | 2818                     | -959  | -120.74 | 3119                     | -651 | -102.87 |
| ClF-HBr  | 2802                     | -975  | -120.66 | 3139                     | -628 | -102.77 |
| ClF-2F   | 3038                     | -739  | -100.37 | 2993                     | -805 | -103.97 |
| ClF-2Cl  | 2946                     | -832  | -107.49 | 3019                     | -735 | -103.47 |
| ClF-2Br  | 2934                     | -844  | -108.88 | 3036                     | -704 | -104.73 |
| ClF-BrF  | 2961                     | -817  | -104.14 | 2994                     | -779 | -105.43 |
| ClF-BrCl | 2939                     | -838  | -109.03 | 2985                     | -763 | -105.40 |
| ClF-HMe  | 2332                     | -1445 | -155.26 | 3392                     | -399 | -95.78  |
| ClF-2Me  | 1931                     | -1846 | -169.01 | 3372                     | -417 | -98.39  |
| ClF-MeF  | 2708                     | -1069 | -131.73 | 3138                     | -651 | -102.22 |
| ClF-MeCl | 2661                     | -1116 | -132.44 | 3172                     | -602 | -102.65 |
| ClF-MeBr | 2662                     | -1116 | -131.13 | 3189                     | -583 | -102.37 |
|          | On PA-BrF due to partner |       |         | On partner due to PA-BrF |      |         |
| BrF-BrF  | 3028                     | -745  | -103.99 | 3028                     | -744 | -103.95 |
| BrF-2H   | 2582                     | -1191 | -142.68 | 3329                     | -461 | -97.75  |
| BrF-HF   | 2880                     | -893  | -118.28 | 3075                     | -710 | -102.55 |
| BrF-HCl  | 2835                     | -937  | -121.02 | 3106                     | -664 | -103.51 |
| BrF-HBr  | 2828                     | -945  | -120.83 | 3130                     | -638 | -103.21 |

|           |                           |       |         |                           |       |         |
|-----------|---------------------------|-------|---------|---------------------------|-------|---------|
| BrF-2F    | 3046                      | -727  | -100.77 | 2982                      | -816  | -104.42 |
| BrF-2Cl   | 2982                      | -791  | -107.39 | 3014                      | -740  | -104.06 |
| BrF-2Br   | 2961                      | -811  | -108.89 | 3048                      | -693  | -104.68 |
| BrF-ClF   | 2994                      | -779  | -105.43 | 2961                      | -817  | -104.14 |
| BrF-BrCl  | 2977                      | -795  | -108.70 | 3057                      | -690  | -104.67 |
| BrF-HMe   | 2379                      | -1394 | -155.78 | 3399                      | -392  | -95.77  |
| BrF-2Me   | 2029                      | -1744 | -169.15 | 3375                      | -414  | -98.33  |
| BrF-MeF   | 2721                      | -1052 | -132.15 | 3132                      | -657  | -102.54 |
| BrF-MeCl  | 2697                      | -1076 | -132.29 | 3173                      | -601  | -102.71 |
| BrF-MeBr  | 2678                      | -1095 | -131.24 | 3181                      | -590  | -102.64 |
|           | On PA-BrCl due to partner |       |         | On partner due to PA-BrCl |       |         |
| BrCl-BrCl | 2964                      | -783  | -107.91 | 2965                      | -783  | -107.90 |
| BrCl-2H   | 2557                      | -1190 | -143.11 | 3284                      | -506  | -101.16 |
| BrCl-HF   | 2864                      | -884  | -118.30 | 3021                      | -764  | -106.25 |
| BrCl-HCl  | 2833                      | -915  | -120.81 | 3076                      | -694  | -107.07 |
| BrCl-HBr  | 2819                      | -928  | -120.92 | 3075                      | -693  | -106.71 |
| BrCl-2F   | 3055                      | -692  | -99.95  | 2918                      | -880  | -107.59 |
| BrCl-2Cl  | 2983                      | -764  | -107.48 | 2941                      | -812  | -108.01 |
| BrCl-2Br  | 2918                      | -830  | -108.37 | 2960                      | -781  | -107.86 |
| BrCl-ClF  | 2985                      | -763  | -105.40 | 2939                      | -838  | -109.03 |
| BrCl-BrF  | 3057                      | -690  | -104.67 | 2977                      | -795  | -108.70 |
| BrCl-HMe  | 2296                      | -1451 | -156.29 | 3378                      | -413  | -98.78  |
| BrCl-2Me  | 1959                      | -1789 | -169.67 | 3347                      | -443  | -101.64 |
| BrCl-MeF  | 2738                      | -1010 | -132.15 | 3097                      | -692  | -105.41 |
| BrCl-MeCl | 2696                      | -1052 | -132.49 | 3120                      | -654  | -106.19 |
| BrCl-MeBr | 2678                      | -1069 | -131.86 | 3127                      | -645  | -106.43 |
|           | On PA-HMe due to partner  |       |         | On partner due to PA-HMe  |       |         |
| HMe-HMe   | 3022                      | -770  | -143.94 | 3019                      | -772  | -144.05 |
| HMe-2H    | 3019                      | -773  | -134.82 | 2885                      | -904  | -147.23 |
| HMe-HF    | 3297                      | -495  | -108.80 | 2552                      | -1234 | -152.66 |
| HMe-HCl   | 3287                      | -505  | -109.26 | 2553                      | -1217 | -154.28 |
| HMe-HBr   | 3284                      | -508  | -108.62 | 2552                      | -1215 | -154.77 |
| HMe-2F    | 3409                      | -383  | -92.72  | 2272                      | -1526 | -155.74 |
| HMe-2Cl   | 3385                      | -407  | -98.48  | 2327                      | -1427 | -155.95 |
| HMe-2Br   | 3367                      | -424  | -99.44  | 2308                      | -1433 | -156.38 |
| HMe-ClF   | 3392                      | -399  | -95.78  | 2332                      | -1445 | -155.26 |
| HMe-BrF   | 3399                      | -392  | -95.77  | 2379                      | -1394 | -155.78 |
| HMe-BrCl  | 3378                      | -413  | -98.78  | 2296                      | -1451 | -156.29 |
| HMe-2Me   | 2913                      | -879  | -155.26 | 3040                      | -750  | -143.49 |
| HMe-MeF   | 3237                      | -554  | -121.18 | 2685                      | -1104 | -149.89 |
| HMe-MeCl  | 3231                      | -561  | -120.59 | 2667                      | -1108 | -151.23 |
| HMe-MeBr  | 3227                      | -565  | -119.79 | 2655                      | -1117 | -151.52 |
|           | On PA-2Me due to partner  |       |         | On partner due to PA-2Me  |       |         |
| 2Me-2Me   | 3011                      | -779  | -149.82 | 3011                      | -779  | -149.82 |
| 2Me-2H    | 3165                      | -625  | -128.88 | 2787                      | -1003 | -156.48 |
| 2Me-HF    | 3286                      | -504  | -110.46 | 2298                      | -1488 | -165.37 |
| 2Me-HCl   | 3274                      | -516  | -110.93 | 2286                      | -1484 | -167.32 |
| 2Me-HBr   | 3270                      | -520  | -110.24 | 2285                      | -1482 | -167.86 |

|           |                           |       |         |                           |       |         |
|-----------|---------------------------|-------|---------|---------------------------|-------|---------|
| 2Me-2F    | 3385                      | -405  | -95.94  | 1920                      | -1878 | -169.73 |
| 2Me-2Cl   | 3352                      | -438  | -101.64 | 1940                      | -1814 | -169.70 |
| 2Me-2Br   | 3340                      | -450  | -102.13 | 1916                      | -1825 | -170.10 |
| 2Me-ClF   | 3372                      | -417  | -98.39  | 1931                      | -1846 | -169.01 |
| 2Me-BrF   | 3375                      | -414  | -98.33  | 2029                      | -1744 | -169.15 |
| 2Me-BrCl  | 3347                      | -443  | -101.64 | 1959                      | -1789 | -169.67 |
| 2Me-HMe   | 3040                      | -750  | -143.49 | 2913                      | -879  | -155.26 |
| 2Me-MeF   | 3228                      | -562  | -120.85 | 2499                      | -1289 | -162.66 |
| 2Me-MeCl  | 3216                      | -574  | -120.10 | 2469                      | -1306 | -164.78 |
| 2Me-MeBr  | 3217                      | -573  | -118.68 | 2457                      | -1314 | -165.36 |
|           | On PA-MeF due to partner  |       |         | On partner due to PA-MeF  |       |         |
| MeF-MeF   | 2933                      | -855  | -127.65 | 2933                      | -855  | -127.64 |
| MeF-2H    | 2862                      | -927  | -135.71 | 3089                      | -701  | -126.78 |
| MeF-HF    | 3044                      | -744  | -115.13 | 2847                      | -938  | -129.09 |
| MeF-HCl   | 3014                      | -774  | -116.74 | 2873                      | -896  | -129.90 |
| MeF-HBr   | 3008                      | -781  | -116.20 | 2897                      | -871  | -129.74 |
| MeF-2F    | 3168                      | -621  | -98.21  | 2702                      | -1096 | -131.44 |
| MeF-2Cl   | 3103                      | -685  | -105.50 | 2709                      | -1044 | -132.31 |
| MeF-2Br   | 3086                      | -702  | -105.58 | 2727                      | -1014 | -132.18 |
| MeF-ClF   | 3138                      | -651  | -102.22 | 2708                      | -1069 | -131.73 |
| MeF-BrF   | 3132                      | -657  | -102.54 | 2721                      | -1052 | -132.15 |
| MeF-BrCl  | 3097                      | -692  | -105.41 | 2738                      | -1010 | -132.15 |
| MeF-HMe   | 2685                      | -1104 | -149.89 | 3237                      | -554  | -121.18 |
| MeF-2Me   | 2499                      | -1289 | -162.66 | 3228                      | -562  | -120.85 |
| MeF-MeCl  | 2896                      | -893  | -128.03 | 2922                      | -852  | -129.13 |
| MeF-MeBr  | 2892                      | -897  | -126.93 | 2921                      | -850  | -129.51 |
|           | On PA-MeCl due to partner |       |         | On partner due to PA-MeCl |       |         |
| MeCl-MeCl | 2913                      | -861  | -128.87 | 2913                      | -861  | -128.87 |
| MeCl-2H   | 2856                      | -919  | -137.25 | 3089                      | -700  | -126.02 |
| MeCl-HF   | 3059                      | -716  | -116.08 | 2807                      | -978  | -129.52 |
| MeCl-HCl  | 3028                      | -747  | -117.83 | 2835                      | -935  | -130.26 |
| MeCl-HBr  | 3018                      | -756  | -117.52 | 2849                      | -919  | -130.44 |
| MeCl-2F   | 3186                      | -589  | -99.42  | 2642                      | -1156 | -132.81 |
| MeCl-2Cl  | 3107                      | -667  | -105.98 | 2658                      | -1095 | -133.03 |
| MeCl-2Br  | 3110                      | -665  | -106.44 | 2682                      | -1059 | -132.59 |
| MeCl-ClF  | 3172                      | -602  | -102.65 | 2661                      | -1116 | -132.44 |
| MeCl-BrF  | 3173                      | -601  | -102.71 | 2697                      | -1076 | -132.29 |
| MeCl-BrCl | 3120                      | -654  | -106.19 | 2696                      | -1052 | -132.49 |
| MeCl-HMe  | 2667                      | -1108 | -151.23 | 3231                      | -561  | -120.59 |
| MeCl-2Me  | 2469                      | -1306 | -164.78 | 3216                      | -574  | -120.10 |
| MeCl-MeF  | 2922                      | -852  | -129.13 | 2896                      | -893  | -128.03 |
| MeCl-MeBr | 2887                      | -887  | -128.51 | 2889                      | -883  | -129.96 |
|           | On PA-MeBr due to partner |       |         | On partner due to PA-MeBr |       |         |
| MeBr-MeBr | 2909                      | -863  | -128.37 | 2909                      | -863  | -128.37 |
| MeBr-2H   | 2842                      | -929  | -138.50 | 3095                      | -695  | -122.95 |
| MeBr-HF   | 3066                      | -705  | -116.20 | 2803                      | -983  | -128.42 |

|           |      |       |         |      |       |         |
|-----------|------|-------|---------|------|-------|---------|
| MeBr-HCl  | 3031 | -740  | -118.08 | 2825 | -945  | -129.43 |
| MeBr-HBr  | 3021 | -750  | -117.85 | 2839 | -929  | -129.72 |
| MeBr-2F   | 3199 | -572  | -99.28  | 2638 | -1160 | -131.82 |
| MeBr-2Cl  | 3140 | -632  | -105.96 | 2662 | -1092 | -131.55 |
| MeBr-2Br  | 3119 | -652  | -106.60 | 2666 | -1075 | -131.90 |
| MeBr-ClF  | 3189 | -583  | -102.37 | 2662 | -1116 | -131.13 |
| MeBr-BrF  | 3181 | -590  | -102.64 | 2678 | -1095 | -131.24 |
| MeBr-BrCl | 3127 | -645  | -106.43 | 2678 | -1069 | -131.86 |
| MeBr-HMe  | 2655 | -1117 | -151.52 | 3227 | -565  | -119.79 |
| MeBr-2Me  | 2457 | -1314 | -165.36 | 3217 | -573  | -118.68 |
| MeBr-MeF  | 2921 | -850  | -129.51 | 2892 | -897  | -126.93 |
| MeBr-MeCl | 2889 | -883  | -129.96 | 2887 | -887  | -128.51 |

**Table S4.** The harmonic vibrational frequencies (in  $\text{cm}^{-1}$ ) of the donor O-D stretch along with its vibrational shift (in  $\text{cm}^{-1}$ ) with respect to O-D stretch of the corresponding phosphinic acid monomer and the electric field (in  $\text{MV cm}^{-1}$ ) along the bond calculated at MP2/aug-cc-pVDZ level of theory for the two cases namely, the effect on acid due to partner and the effect on partner due to acid respectively. For the sake of convenience, the different possible dimers formed by different combinations of the monomeric units will be labelled with respect to the R groups as  $R_1R_2$ , i.e., dimer formed by combination of PA-2H and PA-BrCl will be labelled as (2H-BrCl).

| Dimer   | $\nu_{\text{O-D}}$      | $\Delta\nu_{\text{O-D}}$ | Field   | $\nu_{\text{O-D}}$      | $\Delta\nu_{\text{O-D}}$ | Field   |
|---------|-------------------------|--------------------------|---------|-------------------------|--------------------------|---------|
|         | On PA-2H due to partner |                          |         | On partner due to PA-2H |                          |         |
| 2H-2H   | 2201                    | -557                     | -133.63 | 2201                    | -557                     | -133.64 |
| 2H-HF   | 2325                    | -433                     | -113.23 | 1999                    | -756                     | -139.04 |
| 2H-HCl  | 2308                    | -450                     | -114.57 | 1997                    | -747                     | -140.46 |
| 2H-HBr  | 2302                    | -456                     | -114.21 | 2005                    | -737                     | -140.54 |
| 2H-2F   | 2426                    | -332                     | -95.39  | 1883                    | -881                     | -141.63 |
| 2H-2Cl  | 2381                    | -377                     | -102.88 | 1892                    | -839                     | -141.11 |
| 2H-2Br  | 2378                    | -381                     | -103.07 | 1887                    | -835                     | -141.54 |
| 2H-ClF  | 2420                    | -338                     | -97.50  | 1879                    | -870                     | -142.65 |
| 2H-BrF  | 2415                    | -343                     | -97.75  | 1889                    | -856                     | -142.68 |
| 2H-BrCl | 2383                    | -375                     | -101.16 | 1870                    | -857                     | -143.11 |
| 2H-HMe  | 2107                    | -651                     | -147.23 | 2202                    | -558                     | -134.82 |
| 2H-2Me  | 2038                    | -720                     | -156.48 | 2305                    | -453                     | -128.88 |
| 2H-MeF  | 2250                    | -508                     | -126.78 | 2091                    | -666                     | -135.71 |
| 2H-MeCl | 2251                    | -507                     | -126.02 | 2086                    | -661                     | -137.25 |
| 2H-MeBr | 2256                    | -502                     | -122.95 | 2076                    | -669                     | -138.50 |
|         | On PA-HF due to partner |                          |         | On partner due to PA-HF |                          |         |
| HF-HF   | 2168                    | -587                     | -116.43 | 2163                    | -592                     | -116.56 |
| HF-2H   | 1999                    | -756                     | -139.04 | 2325                    | -433                     | -113.23 |
| HF-HCl  | 2141                    | -614                     | -118.51 | 2185                    | -559                     | -117.10 |
| HF-HBr  | 2135                    | -620                     | -118.24 | 2195                    | -548                     | -117.13 |
| HF-2F   | 2271                    | -484                     | -98.84  | 2093                    | -672                     | -117.96 |
| HF-2Cl  | 2217                    | -539                     | -105.75 | 2101                    | -630                     | -118.09 |
| HF-2Br  | 2198                    | -557                     | -106.42 | 2101                    | -621                     | -118.35 |



|          |                          |       |         |                          |      |         |
|----------|--------------------------|-------|---------|--------------------------|------|---------|
| HF-ClF   | 2247                     | -508  | -102.03 | 2093                     | -657 | -118.02 |
| HF-BrF   | 2241                     | -514  | -102.55 | 2103                     | -643 | -118.28 |
| HF-BrCl  | 2203                     | -552  | -106.25 | 2089                     | -638 | -118.30 |
| HF-HMe   | 1870                     | -885  | -152.66 | 2391                     | -368 | -108.80 |
| HF-2Me   | 1717                     | -1038 | -165.37 | 2414                     | -344 | -110.46 |
| HF-MeF   | 2081                     | -675  | -129.09 | 2219                     | -538 | -115.13 |
| HF-MeCl  | 2053                     | -702  | -129.52 | 2228                     | -519 | -116.08 |
| HF-MeBr  | 2050                     | -705  | -128.42 | 2234                     | -511 | -116.20 |
|          | On PA-HCl due to partner |       |         | On partner due to PA-HCl |      |         |
| HCl-HCl  | 2155                     | -588  | -119.26 | 2154                     | -589 | -119.29 |
| HCl-2H   | 1997                     | -747  | -140.46 | 2308                     | -450 | -114.57 |
| HCl-HF   | 2185                     | -559  | -117.10 | 2141                     | -614 | -118.51 |
| HCl-HBr  | 2148                     | -595  | -119.01 | 2164                     | -578 | -119.33 |
| HCl-2F   | 2298                     | -446  | -99.41  | 2053                     | -712 | -120.68 |
| HCl-2Cl  | 2249                     | -494  | -106.80 | 2078                     | -654 | -120.74 |
| HCl-2Br  | 2218                     | -526  | -107.12 | 2064                     | -658 | -121.02 |
| HCl-ClF  | 2271                     | -473  | -102.87 | 2060                     | -689 | -120.74 |
| HCl-BrF  | 2262                     | -481  | -103.51 | 2072                     | -674 | -121.02 |
| HCl-BrCl | 2241                     | -503  | -107.07 | 2068                     | -659 | -120.81 |
| HCl-HMe  | 1870                     | -873  | -154.28 | 2386                     | -374 | -109.26 |
| HCl-2Me  | 1705                     | -1038 | -167.32 | 2404                     | -354 | -110.93 |
| HCl-MeF  | 2098                     | -646  | -129.90 | 2199                     | -558 | -116.74 |
| HCl-MeCl | 2072                     | -672  | -130.26 | 2207                     | -540 | -117.83 |
| HCl-MeBr | 2064                     | -679  | -129.43 | 2209                     | -535 | -118.08 |
|          | On PA-HBr due to partner |       |         | On partner due to PA-HBr |      |         |
| HBr-HBr  | 2154                     | -588  | -119.16 | 2155                     | -587 | -119.14 |
| HBr-2H   | 2005                     | -737  | -140.54 | 2302                     | -456 | -114.21 |
| HBr-HF   | 2195                     | -548  | -117.13 | 2135                     | -620 | -118.24 |
| HBr-HCl  | 2164                     | -578  | -119.33 | 2148                     | -595 | -119.01 |
| HBr-2F   | 2313                     | -429  | -99.23  | 2043                     | -722 | -120.64 |
| HBr-2Cl  | 2267                     | -475  | -106.46 | 2065                     | -667 | -120.54 |
| HBr-2Br  | 2232                     | -510  | -107.03 | 2050                     | -672 | -120.99 |
| HBr-ClF  | 2285                     | -457  | -102.77 | 2049                     | -700 | -120.66 |
| HBr-BrF  | 2279                     | -463  | -103.21 | 2067                     | -679 | -120.83 |
| HBr-BrCl | 2240                     | -502  | -106.71 | 2059                     | -668 | -120.92 |
| HBr-HMe  | 1870                     | -872  | -154.77 | 2384                     | -375 | -108.62 |
| HBr-2Me  | 1704                     | -1038 | -167.86 | 2400                     | -357 | -110.24 |
| HBr-MeF  | 2114                     | -628  | -129.74 | 2195                     | -562 | -116.20 |
| HBr-MeCl | 2081                     | -661  | -130.44 | 2201                     | -546 | -117.52 |
| HBr-MeBr | 2074                     | -668  | -129.72 | 2203                     | -542 | -117.85 |
|          | On PA-2F due to partner  |       |         | On partner due to PA-2F  |      |         |
| 2F-2F    | 2218                     | -547  | -99.59  | 2218                     | -547 | -99.59  |
| 2F-2H    | 1883                     | -881  | -141.63 | 2426                     | -332 | -95.39  |
| 2F-HF    | 2093                     | -672  | -117.96 | 2271                     | -484 | -98.84  |
| 2F-HCl   | 2053                     | -712  | -120.68 | 2298                     | -446 | -99.41  |
| 2F-HBr   | 2043                     | -722  | -120.64 | 2313                     | -429 | -99.23  |
| 2F-2Cl   | 2143                     | -622  | -107.35 | 2231                     | -501 | -100.06 |
| 2F-2Br   | 2121                     | -644  | -108.04 | 2246                     | -476 | -99.72  |

|          |                          |       |         |                          |      |         |
|----------|--------------------------|-------|---------|--------------------------|------|---------|
| 2F-ClF   | 2184                     | -580  | -103.97 | 2215                     | -534 | -100.37 |
| 2F-BrF   | 2177                     | -588  | -104.42 | 2221                     | -525 | -100.77 |
| 2F-BrCl  | 2131                     | -634  | -107.59 | 2225                     | -502 | -99.95  |
| 2F-HMe   | 1691                     | -1074 | -155.74 | 2488                     | -272 | -92.72  |
| 2F-2Me   | 1465                     | -1299 | -169.73 | 2468                     | -289 | -95.94  |
| 2F-MeF   | 1977                     | -787  | -131.44 | 2304                     | -453 | -98.21  |
| 2F-MeCl  | 1935                     | -830  | -132.81 | 2316                     | -431 | -99.42  |
| 2F-MeBr  | 1933                     | -832  | -131.82 | 2325                     | -419 | -99.28  |
|          | On PA-2Cl due to partner |       |         | On partner due to PA-2Cl |      |         |
| 2Cl-2Cl  | 2155                     | -577  | -109.08 | 2155                     | -576 | -109.07 |
| 2Cl-2H   | 1892                     | -839  | -141.11 | 2381                     | -377 | -102.88 |
| 2Cl-HF   | 2101                     | -630  | -118.09 | 2217                     | -539 | -105.75 |
| 2Cl-HCl  | 2078                     | -654  | -120.74 | 2249                     | -494 | -106.80 |
| 2Cl-HBr  | 2065                     | -667  | -120.54 | 2267                     | -475 | -106.46 |
| 2Cl-2F   | 2231                     | -501  | -100.06 | 2143                     | -622 | -107.35 |
| 2Cl-2Br  | 2134                     | -597  | -108.36 | 2167                     | -555 | -107.53 |
| 2Cl-ClF  | 2200                     | -532  | -103.47 | 2150                     | -599 | -107.49 |
| 2Cl-BrF  | 2196                     | -535  | -104.06 | 2175                     | -571 | -107.39 |
| 2Cl-BrCl | 2145                     | -586  | -108.01 | 2174                     | -553 | -107.48 |
| 2Cl-HMe  | 1724                     | -1007 | -155.95 | 2473                     | -287 | -98.48  |
| 2Cl-2Me  | 1468                     | -1263 | -169.70 | 2445                     | -313 | -101.64 |
| 2Cl-MeF  | 1980                     | -752  | -132.31 | 2259                     | -498 | -105.50 |
| 2Cl-MeCl | 1944                     | -788  | -133.03 | 2261                     | -486 | -105.98 |
| 2Cl-MeBr | 1947                     | -784  | -131.55 | 2284                     | -461 | -105.96 |
|          | On PA-2Br due to partner |       |         | On partner due to PA-2Br |      |         |
| 2Br-2Br  | 2157                     | -564  | -109.10 | 2157                     | -564 | -109.10 |
| 2Br-2H   | 1887                     | -835  | -141.54 | 2378                     | -381 | -103.07 |
| 2Br-HF   | 2101                     | -621  | -118.35 | 2198                     | -557 | -106.42 |
| 2Br-HCl  | 2064                     | -658  | -121.02 | 2218                     | -526 | -107.12 |
| 2Br-HBr  | 2050                     | -672  | -120.99 | 2232                     | -510 | -107.03 |
| 2Br-2F   | 2246                     | -476  | -99.72  | 2121                     | -644 | -108.04 |
| 2Br-2Cl  | 2167                     | -555  | -107.53 | 2134                     | -597 | -108.36 |
| 2Br-ClF  | 2212                     | -510  | -104.73 | 2142                     | -608 | -108.88 |
| 2Br-BrF  | 2220                     | -502  | -104.68 | 2161                     | -584 | -108.89 |
| 2Br-BrCl | 2157                     | -565  | -107.86 | 2128                     | -599 | -108.37 |
| 2Br-HMe  | 1710                     | -1012 | -156.38 | 2460                     | -299 | -99.44  |
| 2Br-2Me  | 1459                     | -1263 | -170.10 | 2437                     | -321 | -102.13 |
| 2Br-MeF  | 1991                     | -730  | -132.18 | 2248                     | -509 | -105.58 |
| 2Br-MeCl | 1960                     | -762  | -132.59 | 2264                     | -483 | -106.44 |
| 2Br-MeBr | 1949                     | -773  | -131.90 | 2270                     | -475 | -106.60 |
|          | On PA-ClF due to partner |       |         | On partner due to PA-ClF |      |         |
| ClF-ClF  | 2168                     | -581  | -103.63 | 2179                     | -570 | -104.88 |
| ClF-2H   | 1879                     | -870  | -142.65 | 2420                     | -338 | -97.50  |
| ClF-HF   | 2093                     | -657  | -118.02 | 2247                     | -508 | -102.03 |
| ClF-HCl  | 2060                     | -689  | -120.74 | 2271                     | -473 | -102.87 |
| ClF-HBr  | 2049                     | -700  | -120.66 | 2285                     | -457 | -102.77 |
| ClF-2F   | 2215                     | -534  | -100.37 | 2184                     | -580 | -103.97 |
| ClF-2Cl  | 2150                     | -599  | -107.49 | 2200                     | -532 | -103.47 |

|           |                           |       |         |                           |       |         |
|-----------|---------------------------|-------|---------|---------------------------|-------|---------|
| ClF-2Br   | 2142                      | -608  | -108.88 | 2212                      | -510  | -104.73 |
| ClF-BrF   | 2160                      | -590  | -104.14 | 2183                      | -562  | -105.43 |
| ClF-BrCl  | 2145                      | -604  | -109.03 | 2175                      | -552  | -105.40 |
| ClF-HMe   | 1731                      | -1018 | -155.26 | 2479                      | -281  | -95.78  |
| ClF-2Me   | 1468                      | -1281 | -169.01 | 2460                      | -298  | -98.39  |
| ClF-MeF   | 1981                      | -768  | -131.73 | 2283                      | -473  | -102.22 |
| ClF-MeCl  | 1948                      | -801  | -132.44 | 2307                      | -440  | -102.65 |
| ClF-MeBr  | 1949                      | -800  | -131.13 | 2319                      | -426  | -102.37 |
|           | On PA-BrF due to partner  |       |         | On partner due to PA-BrF  |       |         |
| BrF-BrF   | 2208                      | -538  | -103.99 | 2208                      | -537  | -103.95 |
| BrF-2H    | 1889                      | -856  | -142.68 | 2415                      | -343  | -97.75  |
| BrF-HF    | 2103                      | -643  | -118.28 | 2241                      | -514  | -102.55 |
| BrF-HCl   | 2072                      | -674  | -121.02 | 2262                      | -481  | -103.51 |
| BrF-HBr   | 2067                      | -679  | -120.83 | 2279                      | -463  | -103.21 |
| BrF-2F    | 2221                      | -525  | -100.77 | 2177                      | -588  | -104.42 |
| BrF-2Cl   | 2175                      | -571  | -107.39 | 2196                      | -535  | -104.06 |
| BrF-2Br   | 2161                      | -584  | -108.89 | 2220                      | -502  | -104.68 |
| BrF-ClF   | 2183                      | -562  | -105.43 | 2160                      | -590  | -104.14 |
| BrF-BrCl  | 2173                      | -573  | -108.70 | 2227                      | -500  | -104.67 |
| BrF-HMe   | 1764                      | -981  | -155.78 | 2486                      | -273  | -95.77  |
| BrF-2Me   | 1523                      | -1223 | -169.15 | 2462                      | -296  | -98.33  |
| BrF-MeF   | 1990                      | -756  | -132.15 | 2280                      | -477  | -102.54 |
| BrF-MeCl  | 1974                      | -772  | -132.29 | 2309                      | -438  | -102.71 |
| BrF-MeBr  | 1961                      | -785  | -131.24 | 2314                      | -430  | -102.64 |
|           | On PA-BrCl due to partner |       |         | On partner due to PA-BrCl |       |         |
| BrCl-BrCl | 2161                      | -566  | -107.91 | 2161                      | -565  | -107.90 |
| BrCl-2H   | 1870                      | -857  | -143.11 | 2383                      | -375  | -101.16 |
| BrCl-HF   | 2089                      | -638  | -118.30 | 2203                      | -552  | -106.25 |
| BrCl-HCl  | 2068                      | -659  | -120.81 | 2241                      | -503  | -107.07 |
| BrCl-HBr  | 2059                      | -668  | -120.92 | 2240                      | -502  | -106.71 |
| BrCl-2F   | 2225                      | -502  | -99.95  | 2131                      | -634  | -107.59 |
| BrCl-2Cl  | 2174                      | -553  | -107.48 | 2145                      | -586  | -108.01 |
| BrCl-2Br  | 2128                      | -599  | -108.37 | 2157                      | -565  | -107.86 |
| BrCl-ClF  | 2175                      | -552  | -105.40 | 2145                      | -604  | -109.03 |
| BrCl-BrF  | 2227                      | -500  | -104.67 | 2173                      | -573  | -108.70 |
| BrCl-HMe  | 1702                      | -1025 | -156.29 | 2467                      | -292  | -98.78  |
| BrCl-2Me  | 1477                      | -1250 | -169.67 | 2442                      | -316  | -101.64 |
| BrCl-MeF  | 2000                      | -727  | -132.15 | 2256                      | -501  | -105.41 |
| BrCl-MeCl | 1971                      | -756  | -132.49 | 2271                      | -475  | -106.19 |
| BrCl-MeBr | 1959                      | -768  | -131.86 | 2276                      | -469  | -106.43 |
|           | On PA-HMe due to partner  |       |         | On partner due to PA-HMe  |       |         |
| HMe-HMe   | 2204                      | -556  | -143.94 | 2202                      | -557  | -144.05 |
| HMe-2H    | 2202                      | -558  | -134.82 | 2107                      | -651  | -147.23 |
| HMe-HF    | 2391                      | -368  | -108.80 | 1870                      | -885  | -152.66 |
| HMe-HCl   | 2386                      | -374  | -109.26 | 1870                      | -873  | -154.28 |
| HMe-HBr   | 2384                      | -375  | -108.62 | 1870                      | -872  | -154.77 |
| HMe-2F    | 2488                      | -272  | -92.72  | 1691                      | -1074 | -155.74 |
| HMe-2Cl   | 2473                      | -287  | -98.48  | 1724                      | -1007 | -155.95 |

|           |                           |      |         |                           |       |         |
|-----------|---------------------------|------|---------|---------------------------|-------|---------|
| HMe-2Br   | 2460                      | -299 | -99.44  | 1710                      | -1012 | -156.38 |
| HMe-ClF   | 2479                      | -281 | -95.78  | 1731                      | -1018 | -155.26 |
| HMe-BrF   | 2486                      | -273 | -95.77  | 1764                      | -981  | -155.78 |
| HMe-BrCl  | 2467                      | -292 | -98.78  | 1702                      | -1025 | -156.29 |
| HMe-2Me   | 2126                      | -633 | -155.26 | 2217                      | -541  | -143.49 |
| HMe-MeF   | 2354                      | -405 | -121.18 | 1966                      | -791  | -149.89 |
| HMe-MeCl  | 2350                      | -409 | -120.59 | 1952                      | -795  | -151.23 |
| HMe-MeBr  | 2347                      | -413 | -119.79 | 1943                      | -801  | -151.52 |
|           | On PA-2Me due to partner  |      |         | On partner due to PA-2Me  |       |         |
| 2Me-2Me   | 2196                      | -562 | -149.82 | 2196                      | -562  | -149.82 |
| 2Me-2H    | 2305                      | -453 | -128.88 | 2038                      | -720  | -156.48 |
| 2Me-HF    | 2414                      | -344 | -110.46 | 1717                      | -1038 | -165.37 |
| 2Me-HCl   | 2404                      | -354 | -110.93 | 1705                      | -1038 | -167.32 |
| 2Me-HBr   | 2400                      | -357 | -110.24 | 1704                      | -1038 | -167.86 |
| 2Me-2F    | 2468                      | -289 | -95.94  | 1465                      | -1299 | -169.73 |
| 2Me-2Cl   | 2445                      | -313 | -101.64 | 1468                      | -1263 | -169.70 |
| 2Me-2Br   | 2437                      | -321 | -102.13 | 1459                      | -1263 | -170.10 |
| 2Me-ClF   | 2460                      | -298 | -98.39  | 1468                      | -1281 | -169.01 |
| 2Me-BrF   | 2462                      | -296 | -98.33  | 1523                      | -1223 | -169.15 |
| 2Me-BrCl  | 2442                      | -316 | -101.64 | 1477                      | -1250 | -169.67 |
| 2Me-HMe   | 2217                      | -541 | -143.49 | 2126                      | -633  | -155.26 |
| 2Me-MeF   | 2341                      | -417 | -120.85 | 1831                      | -926  | -162.66 |
| 2Me-MeCl  | 2331                      | -427 | -120.10 | 1807                      | -940  | -164.78 |
| 2Me-MeBr  | 2330                      | -428 | -118.68 | 1798                      | -947  | -165.36 |
|           | On PA-MeF due to partner  |      |         | On partner due to PA-MeF  |       |         |
| MeF-MeF   | 2141                      | -616 | -127.65 | 2141                      | -616  | -127.64 |
| MeF-2H    | 2091                      | -666 | -135.71 | 2250                      | -508  | -126.78 |
| MeF-HF    | 2219                      | -538 | -115.13 | 2081                      | -675  | -129.09 |
| MeF-HCl   | 2199                      | -558 | -116.74 | 2098                      | -646  | -129.90 |
| MeF-HBr   | 2195                      | -562 | -116.20 | 2114                      | -628  | -129.74 |
| MeF-2F    | 2304                      | -453 | -98.21  | 1977                      | -787  | -131.44 |
| MeF-2Cl   | 2259                      | -498 | -105.50 | 1980                      | -752  | -132.31 |
| MeF-2Br   | 2248                      | -509 | -105.58 | 1991                      | -730  | -132.18 |
| MeF-ClF   | 2283                      | -473 | -102.22 | 1981                      | -768  | -131.73 |
| MeF-BrF   | 2280                      | -477 | -102.54 | 1990                      | -756  | -132.15 |
| MeF-BrCl  | 2256                      | -501 | -105.41 | 2000                      | -727  | -132.15 |
| MeF-HMe   | 1965                      | -791 | -149.89 | 2354                      | -405  | -121.18 |
| MeF-2Me   | 1831                      | -926 | -162.66 | 2341                      | -417  | -120.85 |
| MeF-MeCl  | 2114                      | -643 | -128.03 | 2132                      | -615  | -129.13 |
| MeF-MeBr  | 2112                      | -645 | -126.93 | 2131                      | -614  | -129.51 |
|           | On PA-MeCl due to partner |      |         | On partner due to PA-MeCl |       |         |
| MeCl-MeCl | 2126                      | -621 | -128.87 | 2126                      | -621  | -128.87 |
| MeCl-2H   | 2086                      | -661 | -137.25 | 2251                      | -507  | -126.02 |
| MeCl-HF   | 2228                      | -519 | -116.08 | 2053                      | -702  | -129.52 |
| MeCl-HCl  | 2207                      | -540 | -117.83 | 2072                      | -672  | -130.26 |
| MeCl-HBr  | 2201                      | -546 | -117.52 | 2081                      | -661  | -130.44 |
| MeCl-2F   | 2316                      | -431 | -99.42  | 1935                      | -830  | -132.81 |
| MeCl-2Cl  | 2261                      | -486 | -105.98 | 1944                      | -788  | -133.03 |

|               |                           |      |         |                           |      |         |
|---------------|---------------------------|------|---------|---------------------------|------|---------|
| MeCl-2Br      | 2264                      | -483 | -106.44 | 1960                      | -762 | -132.59 |
| MeCl-ClF      | 2307                      | -440 | -102.65 | 1948                      | -801 | -132.44 |
| MeCl-BrF      | 2309                      | -438 | -102.71 | 1974                      | -772 | -132.29 |
| MeCl-BrCl     | 2271                      | -475 | -106.19 | 1971                      | -756 | -132.49 |
| MeCl-HMe      | 1952                      | -795 | -151.23 | 2350                      | -409 | -120.59 |
| MeCl-2Me      | 1807                      | -940 | -164.78 | 2331                      | -427 | -120.10 |
| MeCl-MeF      | 2132                      | -615 | -129.13 | 2114                      | -643 | -128.03 |
| MeCl-<br>MeBr | 2108                      | -639 | -128.51 | 2108                      | -636 | -129.96 |
|               | On PA-MeBr due to partner |      |         | On partner due to PA-MeBr |      |         |
| MeBr-<br>MeBr | 2123                      | -622 | -128.37 | 2123                      | -622 | -128.37 |
| MeBr-2H       | 2076                      | -669 | -138.50 | 2256                      | -502 | -122.95 |
| MeBr-HF       | 2234                      | -511 | -116.20 | 2050                      | -705 | -128.42 |
| MeBr-HCl      | 2209                      | -535 | -118.08 | 2064                      | -679 | -129.43 |
| MeBr-HBr      | 2203                      | -542 | -117.85 | 2074                      | -668 | -129.72 |
| MeBr-2F       | 2325                      | -419 | -99.28  | 1933                      | -832 | -131.82 |
| MeBr-2Cl      | 2284                      | -461 | -105.96 | 1947                      | -784 | -131.55 |
| MeBr-2Br      | 2270                      | -475 | -106.60 | 1949                      | -773 | -131.90 |
| MeBr-ClF      | 2319                      | -426 | -102.37 | 1949                      | -800 | -131.13 |
| MeBr-BrF      | 2314                      | -430 | -102.64 | 1961                      | -785 | -131.24 |
| MeBr-BrCl     | 2276                      | -469 | -106.43 | 1959                      | -768 | -131.86 |
| MeBr-HMe      | 1943                      | -801 | -151.52 | 2347                      | -413 | -119.79 |
| MeBr-2Me      | 1798                      | -947 | -165.36 | 2330                      | -428 | -118.68 |
| MeBr-MeF      | 2131                      | -614 | -129.51 | 2112                      | -645 | -126.93 |
| MeBr-<br>MeCl | 2108                      | -636 | -129.96 | 2108                      | -639 | -128.51 |

**Table S5.** The harmonic vibrational frequencies (in  $\text{cm}^{-1}$ ) of the donor O-D stretch along with its vibrational shift (in  $\text{cm}^{-1}$ ) with respect to O-D stretch of the corresponding phosphinic acid monomer and the electric field (in  $\text{MV cm}^{-1}$ ) along the bond calculated at B3LYP-D3/aug-cc-pVDZ level of theory for the two cases namely, the effect on acid due to partner and the effect on partner due to acid respectively. For the sake of convenience, the different possible dimers formed by different combinations of the monomeric units will be labelled with respect to the R groups as  $R_1R_2$ , i.e., dimer formed by combination of PA-2H and PA-BrCl will be labelled as (2H-BrCl).

| Dimer  | $\nu_{\text{O-D}}$      | $\Delta\nu_{\text{O-D}}$ | Field   | $\nu_{\text{O-D}}$      | $\Delta\nu_{\text{O-D}}$ | Field   |
|--------|-------------------------|--------------------------|---------|-------------------------|--------------------------|---------|
|        | On PA-2H due to partner |                          |         | On partner due to PA-2H |                          |         |
| 2H-2H  | 2144                    | -615                     | -111.49 | 2144                    | -615                     | -111.49 |
| 2H-HF  | 2258                    | -501                     | -97.07  | 1941                    | -814                     | -114.63 |
| 2H-HCl | 2248                    | -511                     | -96.11  | 1955                    | -794                     | -115.58 |
| 2H-HBr | 2248                    | -512                     | -95.21  | 1963                    | -786                     | -115.70 |
| 2H-2F  | 2333                    | -426                     | -85.48  | 1811                    | -954                     | -115.31 |
| 2H-2Cl | 2315                    | -444                     | -84.68  | 1809                    | -930                     | -116.11 |
| 2H-2Br | 2306                    | -453                     | -84.57  | 1828                    | -903                     | -114.34 |
| 2H-ClF | 2331                    | -428                     | -85.45  | 1816                    | -936                     | -116.10 |
| 2H-BrF | 2331                    | -428                     | -85.01  | 1830                    | -920                     | -116.37 |

|          |                          |       |         |                          |      |         |
|----------|--------------------------|-------|---------|--------------------------|------|---------|
| 2H-BrCl  | 2317                     | -442  | -84.19  | 1825                     | -911 | -116.34 |
| 2H-HMe   | 2045                     | -714  | -125.06 | 2166                     | -600 | -112.69 |
| 2H-2Me   | 1960                     | -799  | -133.17 | 2264                     | -504 | -108.68 |
| 2H-MeF   | 2187                     | -572  | -109.65 | 2043                     | -718 | -112.29 |
| 2H-MeCl  | 2191                     | -568  | -106.21 | 2054                     | -702 | -112.95 |
| 2H-MeBr  | 2205                     | -554  | -103.98 | 2051                     | -705 | -113.88 |
|          | On PA-HF due to partner  |       |         | On partner due to PA-HF  |      |         |
| HF-HF    | 2099                     | -656  | -98.58  | 2100                     | -655 | -98.56  |
| HF-2H    | 1941                     | -814  | -114.63 | 2258                     | -501 | -97.07  |
| HF-HCl   | 2085                     | -670  | -97.62  | 2124                     | -625 | -98.94  |
| HF-HBr   | 2086                     | -668  | -96.82  | 2135                     | -613 | -98.93  |
| HF-2F    | 2207                     | -548  | -85.90  | 2004                     | -761 | -99.35  |
| HF-2Cl   | 2165                     | -590  | -85.61  | 2024                     | -715 | -98.80  |
| HF-2Br   | 2157                     | -597  | -84.31  | 2032                     | -699 | -98.75  |
| HF-ClF   | 2188                     | -567  | -86.03  | 2021                     | -732 | -99.03  |
| HF-BrF   | 2184                     | -570  | -85.57  | 2033                     | -717 | -99.14  |
| HF-BrCl  | 2163                     | -592  | -84.74  | 2014                     | -722 | -98.35  |
| HF-HMe   | 1807                     | -948  | -126.95 | 2326                     | -440 | -94.58  |
| HF-2Me   | 1639                     | -1115 | -139.13 | 2367                     | -400 | -95.20  |
| HF-MeF   | 2003                     | -752  | -110.99 | 2165                     | -597 | -97.83  |
| HF-MeCl  | 1992                     | -763  | -108.46 | 2184                     | -573 | -98.30  |
| HF-MeBr  | 1996                     | -759  | -107.06 | 2189                     | -567 | -98.36  |
|          | On PA-HCl due to partner |       |         | On partner due to PA-HCl |      |         |
| HCl-HCl  | 2109                     | -640  | -98.06  | 2110                     | -639 | -98.05  |
| HCl-2H   | 1955                     | -794  | -115.58 | 2248                     | -511 | -96.11  |
| HCl-HF   | 2124                     | -625  | -98.94  | 2085                     | -670 | -97.62  |
| HCl-HBr  | 2106                     | -643  | -97.38  | 2116                     | -633 | -98.23  |
| HCl-2F   | 2237                     | -512  | -86.43  | 1977                     | -788 | -98.84  |
| HCl-2Cl  | 2201                     | -548  | -86.63  | 2006                     | -733 | -98.04  |
| HCl-2Br  | 2189                     | -559  | -84.77  | 2006                     | -725 | -98.33  |
| HCl-ClF  | 2218                     | -531  | -86.61  | 1992                     | -760 | -98.67  |
| HCl-BrF  | 2216                     | -533  | -86.31  | 2006                     | -744 | -98.72  |
| HCl-BrCl | 2191                     | -558  | -85.70  | 2015                     | -720 | -98.51  |
| HCl-HMe  | 1816                     | -933  | -128.16 | 2329                     | -437 | -93.21  |
| HCl-2Me  | 1643                     | -1106 | -140.41 | 2367                     | -400 | -93.53  |
| HCl-MeF  | 2032                     | -717  | -111.34 | 2160                     | -601 | -96.32  |
| HCl-MeCl | 2024                     | -725  | -108.70 | 2174                     | -582 | -96.96  |
| HCl-MeBr | 2025                     | -724  | -107.26 | 2185                     | -571 | -96.87  |
|          | On PA-HBr due to partner |       |         | On partner due to PA-HBr |      |         |
| HBr-HBr  | 2119                     | -629  | -97.30  | 2119                     | -629 | -97.29  |
| HBr-2H   | 1963                     | -786  | -115.70 | 2248                     | -512 | -95.21  |
| HBr-HF   | 2135                     | -613  | -98.93  | 2086                     | -668 | -96.82  |
| HBr-HCl  | 2116                     | -633  | -98.23  | 2106                     | -643 | -97.38  |
| HBr-2F   | 2251                     | -498  | -86.36  | 1970                     | -794 | -98.24  |
| HBr-2Cl  | 2215                     | -533  | -86.60  | 1998                     | -741 | -97.41  |
| HBr-2Br  | 2201                     | -547  | -84.86  | 2002                     | -729 | -97.61  |
| HBr-ClF  | 2230                     | -519  | -86.68  | 1985                     | -767 | -98.06  |
| HBr-BrF  | 2230                     | -519  | -86.19  | 2007                     | -743 | -98.05  |

|          |                          |       |         |                          |      |        |
|----------|--------------------------|-------|---------|--------------------------|------|--------|
| HBr-BrCl | 2206                     | -543  | -85.74  | 2010                     | -725 | -97.81 |
| HBr-HMe  | 1821                     | -927  | -128.50 | 2333                     | -433 | -92.17 |
| HBr-2Me  | 1647                     | -1101 | -140.63 | 2206                     | -562 | -92.57 |
| HBr-MeF  | 2046                     | -702  | -111.29 | 2162                     | -600 | -95.41 |
| HBr-MeCl | 2037                     | -712  | -108.73 | 2177                     | -580 | -96.00 |
| HBr-MeBr | 2038                     | -711  | -107.37 | 2179                     | -577 | -96.15 |
|          | On PA-2F due to partner  |       |         | On partner due to PA-2F  |      |        |
| 2F-2F    | 2142                     | -623  | -86.03  | 2142                     | -622 | -86.04 |
| 2F-2H    | 1811                     | -954  | -115.31 | 2333                     | -426 | -85.48 |
| 2F-HF    | 2004                     | -761  | -99.35  | 2207                     | -548 | -85.90 |
| 2F-HCl   | 1977                     | -788  | -98.84  | 2237                     | -512 | -86.43 |
| 2F-HBr   | 1970                     | -794  | -98.24  | 2251                     | -498 | -86.36 |
| 2F-2Cl   | 2083                     | -681  | -86.27  | 2159                     | -580 | -85.90 |
| 2F-2Br   | 2071                     | -693  | -84.84  | 2172                     | -560 | -85.78 |
| 2F-ClF   | 2112                     | -653  | -86.54  | 2153                     | -600 | -86.07 |
| 2F-BrF   | 2107                     | -657  | -86.03  | 2164                     | -587 | -86.21 |
| 2F-BrCl  | 2078                     | -686  | -85.44  | 2150                     | -585 | -85.34 |
| 2F-HMe   | 1599                     | -1165 | -128.69 | 2443                     | -323 | -82.63 |
| 2F-2Me   | 1350                     | -1415 | -140.80 | 2426                     | -342 | -85.70 |
| 2F-MeF   | 1873                     | -891  | -112.25 | 2249                     | -512 | -85.62 |
| 2F-MeCl  | 1855                     | -910  | -110.25 | 2270                     | -487 | -86.19 |
| 2F-MeBr  | 1859                     | -905  | -108.89 | 2278                     | -478 | -86.17 |
|          | On PA-2Cl due to partner |       |         | On partner due to PA-2Cl |      |        |
| 2Cl-2Cl  | 2104                     | -635  | -86.67  | 2104                     | -635 | -86.67 |
| 2Cl-2H   | 1809                     | -930  | -116.11 | 2315                     | -444 | -84.68 |
| 2Cl-HF   | 2024                     | -715  | -98.80  | 2165                     | -590 | -85.61 |
| 2Cl-HCl  | 2006                     | -733  | -98.04  | 2201                     | -548 | -86.63 |
| 2Cl-HBr  | 1998                     | -741  | -97.41  | 2215                     | -533 | -86.60 |
| 2Cl-2F   | 2159                     | -580  | -85.90  | 2083                     | -681 | -86.27 |
| 2Cl-2Br  | 2095                     | -644  | -84.46  | 2121                     | -610 | -85.66 |
| 2Cl-ClF  | 2137                     | -602  | -85.77  | 2100                     | -652 | -85.86 |
| 2Cl-BrF  | 2130                     | -609  | -85.49  | 2115                     | -635 | -86.09 |
| 2Cl-BrCl | 2100                     | -639  | -85.39  | 2127                     | -608 | -85.85 |
| 2Cl-HMe  | 1590                     | -1149 | -128.20 | 2437                     | -328 | -85.20 |
| 2Cl-2Me  | 1300                     | -1439 | -141.38 | 2415                     | -353 | -84.33 |
| 2Cl-MeF  | 1891                     | -848  | -111.71 | 2219                     | -543 | -85.01 |
| 2Cl-MeCl | 1874                     | -865  | -109.60 | 2238                     | -518 | -85.59 |
| 2Cl-MeBr | 1879                     | -860  | -107.90 | 2256                     | -500 | -85.78 |
|          | On PA-2Br due to partner |       |         | On partner due to PA-2Br |      |        |
| 2Br-2Br  | 2106                     | -625  | -85.43  | 2106                     | -626 | -85.43 |
| 2Br-2H   | 1828                     | -903  | -114.34 | 2306                     | -453 | -84.57 |
| 2Br-HF   | 2032                     | -699  | -98.75  | 2157                     | -597 | -84.31 |
| 2Br-HCl  | 2006                     | -725  | -98.33  | 2189                     | -559 | -84.77 |
| 2Br-HBr  | 2002                     | -729  | -97.61  | 2201                     | -547 | -84.86 |
| 2Br-2F   | 2172                     | -560  | -85.78  | 2071                     | -693 | -84.84 |
| 2Br-2Cl  | 2121                     | -610  | -85.66  | 2095                     | -644 | -84.46 |
| 2Br-ClF  | 2137                     | -594  | -86.60  | 2087                     | -665 | -85.34 |
| 2Br-BrF  | 2138                     | -593  | -86.03  | 2109                     | -641 | -85.62 |

|           |                           |       |         |                           |      |        |
|-----------|---------------------------|-------|---------|---------------------------|------|--------|
| 2Br-BrCl  | 2118                      | -614  | -84.76  | 2086                      | -650 | -84.09 |
| 2Br-HMe   | 1628                      | -1103 | -128.71 | 2433                      | -333 | -80.89 |
| 2Br-2Me   | 1337                      | -1394 | -140.69 | 2414                      | -353 | -83.35 |
| 2Br-MeF   | 1895                      | -836  | -111.50 | 2219                      | -542 | -84.06 |
| 2Br-MeCl  | 1891                      | -840  | -109.19 | 2245                      | -511 | -84.40 |
| 2Br-MeBr  | 1897                      | -834  | -107.83 | 2255                      | -501 | -84.33 |
|           | On PA-ClF due to partner  |       |         | On partner due to PA-ClF  |      |        |
| ClF-ClF   | 2124                      | -629  | -86.22  | 2119                      | -633 | -85.81 |
| ClF-2H    | 1816                      | -936  | -116.10 | 2331                      | -428 | -85.45 |
| ClF-HF    | 2021                      | -732  | -99.03  | 2188                      | -567 | -86.03 |
| ClF-HCl   | 1992                      | -760  | -98.67  | 2218                      | -531 | -86.61 |
| ClF-HBr   | 1985                      | -767  | -98.06  | 2230                      | -519 | -86.68 |
| ClF-2F    | 2153                      | -600  | -86.07  | 2112                      | -653 | -86.54 |
| ClF-2Cl   | 2100                      | -652  | -85.86  | 2137                      | -602 | -85.77 |
| ClF-2Br   | 2087                      | -665  | -85.34  | 2137                      | -594 | -86.60 |
| ClF-BrF   | 2117                      | -636  | -85.44  | 2142                      | -608 | -86.59 |
| ClF-BrCl  | 2089                      | -663  | -86.27  | 2120                      | -616 | -86.25 |
| ClF-HMe   | 1624                      | -1128 | -127.96 | 2178                      | -588 | -82.03 |
| ClF-2Me   | 1349                      | -1404 | -140.22 | 2426                      | -341 | -84.74 |
| ClF-MeF   | 1893                      | -860  | -111.91 | 2237                      | -525 | -85.84 |
| ClF-MeCl  | 1874                      | -878  | -109.63 | 2258                      | -498 | -86.31 |
| ClF-MeBr  | 1878                      | -875  | -108.34 | 2267                      | -490 | -86.35 |
|           | On PA-BrF due to partner  |       |         | On partner due to PA-BrF  |      |        |
| BrF-BrF   | 2141                      | -610  | -85.99  | 2142                      | -609 | -86.07 |
| BrF-2H    | 1830                      | -920  | -116.37 | 2331                      | -428 | -85.01 |
| BrF-HF    | 2033                      | -717  | -99.14  | 2184                      | -570 | -85.57 |
| BrF-HCl   | 2006                      | -744  | -98.72  | 2216                      | -533 | -86.31 |
| BrF-HBr   | 2007                      | -743  | -98.05  | 2230                      | -519 | -86.19 |
| BrF-2F    | 2164                      | -587  | -86.21  | 2107                      | -657 | -86.03 |
| BrF-2Cl   | 2115                      | -635  | -86.09  | 2130                      | -609 | -85.49 |
| BrF-2Br   | 2109                      | -641  | -85.62  | 2138                      | -593 | -86.03 |
| BrF-ClF   | 2142                      | -608  | -86.59  | 2117                      | -636 | -85.44 |
| BrF-BrCl  | 2116                      | -635  | -86.26  | 2146                      | -590 | -86.22 |
| BrF-HMe   | 1656                      | -1094 | -128.25 | 2445                      | -321 | -81.24 |
| BrF-2Me   | 1388                      | -1362 | -140.43 | 2433                      | -335 | -83.69 |
| BrF-MeF   | 1907                      | -843  | -112.05 | 2238                      | -523 | -85.16 |
| BrF-MeCl  | 1898                      | -852  | -109.68 | 2260                      | -497 | -85.72 |
| BrF-MeBr  | 1908                      | -842  | -108.30 | 2275                      | -482 | -85.65 |
|           | On PA-BrCl due to partner |       |         | On partner due to PA-BrCl |      |        |
| BrCl-BrCl | 2119                      | -617  | -85.57  | 2119                      | -616 | -85.58 |
| BrCl-2H   | 1825                      | -911  | -116.34 | 2317                      | -442 | -84.19 |
| BrCl-HF   | 2014                      | -722  | -98.35  | 2163                      | -592 | -84.74 |
| BrCl-HCl  | 2015                      | -720  | -98.51  | 2191                      | -558 | -85.70 |
| BrCl-HBr  | 2010                      | -725  | -97.81  | 2206                      | -543 | -85.74 |
| BrCl-2F   | 2150                      | -585  | -85.34  | 2078                      | -686 | -85.44 |
| BrCl-2Cl  | 2127                      | -608  | -85.85  | 2100                      | -639 | -85.39 |
| BrCl-2Br  | 2086                      | -650  | -84.09  | 2118                      | -614 | -84.76 |
| BrCl-ClF  | 2120                      | -616  | -86.25  | 2089                      | -663 | -86.27 |



|           |                          |       |         |                          |       |         |
|-----------|--------------------------|-------|---------|--------------------------|-------|---------|
| BrCl-BrF  | 2146                     | -590  | -86.22  | 2116                     | -635  | -86.26  |
| BrCl-HMe  | 1597                     | -1139 | -130.00 | 2435                     | -331  | -80.69  |
| BrCl-2Me  | 1363                     | -1373 | -140.61 | 2418                     | -349  | -83.70  |
| BrCl-MeF  | 1914                     | -822  | -111.88 | 2223                     | -539  | -84.76  |
| BrCl-MeCl | 1904                     | -831  | -109.42 | 2247                     | -509  | -85.17  |
| BrCl-MeBr | 1909                     | -827  | -108.06 | 2257                     | -500  | -85.15  |
|           | On PA-HMe due to partner |       |         | On partner due to PA-HMe |       |         |
| HMe-HMe   | 2152                     | -614  | -122.97 | 2152                     | -614  | -122.96 |
| HMe-2H    | 2166                     | -600  | -112.69 | 2045                     | -714  | -125.06 |
| HMe-HF    | 2326                     | -440  | -94.58  | 1807                     | -948  | -126.95 |
| HMe-HCl   | 2329                     | -437  | -93.21  | 1816                     | -933  | -128.16 |
| HMe-HBr   | 2333                     | -433  | -92.17  | 1821                     | -927  | -128.50 |
| HMe-2F    | 2443                     | -323  | -82.63  | 1599                     | -1165 | -128.69 |
| HMe-2Cl   | 2437                     | -328  | -85.20  | 1590                     | -1149 | -128.20 |
| HMe-2Br   | 2433                     | -333  | -80.89  | 1628                     | -1103 | -128.71 |
| HMe-ClF   | 2440                     | -326  | -82.03  | 1624                     | -1128 | -127.96 |
| HMe-BrF   | 2445                     | -321  | -81.24  | 1656                     | -1094 | -128.25 |
| HMe-BrCl  | 2435                     | -331  | -80.69  | 1597                     | -1139 | -130.00 |
| HMe-2Me   | 2069                     | -697  | -134.20 | 2187                     | -580  | -121.87 |
| HMe-MeF   | 2310                     | -456  | -105.70 | 1913                     | -848  | -125.25 |
| HMe-MeCl  | 2302                     | -464  | -102.61 | 1912                     | -844  | -125.81 |
| HMe-MeBr  | 2292                     | -474  | -101.54 | 1907                     | -849  | -125.76 |
|           | On PA-2Me due to partner |       |         | On partner due to PA-2Me |       |         |
| 2Me-2Me   | 2142                     | -625  | -129.01 | 2142                     | -625  | -129.00 |
| 2Me-2H    | 2264                     | -504  | -108.68 | 1960                     | -799  | -133.17 |
| 2Me-HF    | 2367                     | -400  | -95.20  | 1639                     | -1115 | -139.13 |
| 2Me-HCl   | 2367                     | -400  | -93.53  | 1643                     | -1106 | -140.41 |
| 2Me-HBr   | 2368                     | -400  | -92.57  | 1647                     | -1101 | -140.63 |
| 2Me-2F    | 2426                     | -342  | -85.70  | 1350                     | -1415 | -140.80 |
| 2Me-2Cl   | 2415                     | -353  | -84.33  | 1300                     | -1439 | -141.38 |
| 2Me-2Br   | 2414                     | -353  | -83.35  | 1337                     | -1394 | -140.69 |
| 2Me-ClF   | 2426                     | -341  | -84.74  | 1349                     | -1404 | -140.22 |
| 2Me-BrF   | 2433                     | -335  | -83.69  | 1388                     | -1362 | -140.43 |
| 2Me-BrCl  | 2418                     | -349  | -83.70  | 1363                     | -1373 | -140.61 |
| 2Me-HMe   | 2187                     | -580  | -121.87 | 2069                     | -697  | -134.20 |
| 2Me-MeF   | 2289                     | -479  | -105.85 | 1787                     | -975  | -137.17 |
| 2Me-MeCl  | 2290                     | -478  | -102.93 | 1775                     | -981  | -138.35 |
| 2Me-MeBr  | 2292                     | -475  | -101.35 | 1772                     | -984  | -138.65 |
|           | On PA-MeF due to partner |       |         | On partner due to PA-MeF |       |         |
| MeF-MeF   | 2083                     | -678  | -109.91 | 2083                     | -679  | -109.91 |
| MeF-2H    | 2043                     | -718  | -112.29 | 2187                     | -572  | -109.65 |
| MeF-HF    | 2165                     | -597  | -97.83  | 2003                     | -752  | -110.99 |
| MeF-HCl   | 2160                     | -601  | -96.32  | 2032                     | -717  | -111.34 |
| MeF-HBr   | 2162                     | -600  | -95.41  | 2046                     | -702  | -111.29 |
| MeF-2F    | 2249                     | -512  | -85.62  | 1873                     | -891  | -112.25 |
| MeF-2Cl   | 2219                     | -543  | -85.01  | 1891                     | -848  | -111.71 |
| MeF-2Br   | 2219                     | -542  | -84.06  | 1895                     | -836  | -111.50 |
| MeF-ClF   | 2237                     | -525  | -85.84  | 1893                     | -860  | -111.91 |

|               |                           |      |         |                           |      |         |
|---------------|---------------------------|------|---------|---------------------------|------|---------|
| MeF-BrF       | 2238                      | -523 | -85.16  | 1907                      | -843 | -112.05 |
| MeF-BrCl      | 2223                      | -539 | -84.76  | 1914                      | -822 | -111.88 |
| MeF-HMe       | 1913                      | -848 | -125.25 | 2310                      | -456 | -105.70 |
| MeF-2Me       | 1787                      | -975 | -137.17 | 2289                      | -479 | -105.85 |
| MeF-MeCl      | 2072                      | -689 | -107.26 | 2086                      | -671 | -110.55 |
| MeF-MeBr      | 2074                      | -687 | -105.76 | 2083                      | -674 | -110.81 |
|               | On PA-MeCl due to partner |      |         | On partner due to PA-MeCl |      |         |
| MeCl-MeCl     | 2095                      | -662 | -107.63 | 2095                      | -662 | -107.62 |
| MeCl-2H       | 2054                      | -702 | -112.95 | 2191                      | -568 | -106.21 |
| MeCl-HF       | 2184                      | -573 | -98.30  | 1992                      | -763 | -108.46 |
| MeCl-HCl      | 2174                      | -582 | -96.96  | 2024                      | -725 | -108.70 |
| MeCl-HBr      | 2177                      | -580 | -96.00  | 2037                      | -712 | -108.73 |
| MeCl-2F       | 2270                      | -487 | -86.19  | 1855                      | -910 | -110.25 |
| MeCl-2Cl      | 2238                      | -518 | -85.59  | 1874                      | -865 | -109.60 |
| MeCl-2Br      | 2245                      | -511 | -84.40  | 1891                      | -840 | -109.19 |
| MeCl-ClF      | 2258                      | -498 | -86.31  | 1874                      | -878 | -109.63 |
| MeCl-BrF      | 2260                      | -497 | -85.72  | 1898                      | -852 | -109.68 |
| MeCl-BrCl     | 2247                      | -509 | -85.17  | 1904                      | -831 | -109.42 |
| MeCl-HMe      | 1912                      | -844 | -125.81 | 2302                      | -464 | -102.61 |
| MeCl-2Me      | 1775                      | -981 | -138.35 | 2290                      | -478 | -102.93 |
| MeCl-MeF      | 2086                      | -671 | -110.55 | 2072                      | -689 | -107.26 |
| MeCl-<br>MeBr | 2082                      | -675 | -106.53 | 2079                      | -678 | -108.18 |
|               | On PA-MeBr due to partner |      |         | On partner due to PA-MeBr |      |         |
| MeBr-<br>MeBr | 2100                      | -656 | -106.28 | 2101                      | -656 | -106.30 |
| MeBr-2H       | 2051                      | -705 | -113.88 | 2205                      | -554 | -103.98 |
| MeBr-HF       | 2189                      | -567 | -98.36  | 1996                      | -759 | -107.06 |
| MeBr-HCl      | 2185                      | -571 | -96.87  | 2025                      | -724 | -107.26 |
| MeBr-HBr      | 2179                      | -577 | -96.15  | 2038                      | -711 | -107.37 |
| MeBr-2F       | 2278                      | -478 | -86.17  | 1859                      | -905 | -108.89 |
| MeBr-2Cl      | 2256                      | -500 | -85.78  | 1879                      | -860 | -107.90 |
| MeBr-2Br      | 2255                      | -501 | -84.33  | 1897                      | -834 | -107.83 |
| MeBr-ClF      | 2267                      | -490 | -86.35  | 1878                      | -875 | -108.34 |
| MeBr-BrF      | 2275                      | -482 | -85.65  | 1908                      | -842 | -108.30 |
| MeBr-BrCl     | 2257                      | -500 | -85.15  | 1909                      | -827 | -108.06 |
| MeBr-HMe      | 1907                      | -849 | -125.76 | 2292                      | -474 | -101.54 |
| MeBr-2Me      | 1772                      | -984 | -138.65 | 2292                      | -475 | -101.35 |
| MeBr-MeF      | 2083                      | -674 | -110.81 | 2074                      | -687 | -105.76 |
| MeBr-<br>MeCl | 2079                      | -678 | -108.18 | 2082                      | -675 | -106.53 |

**Table S6.** The anharmonic vibrational frequencies (in  $\text{cm}^{-1}$ ) of the donor O-D stretch along with its vibrational shift (in  $\text{cm}^{-1}$ ) with respect to O-D stretch of the corresponding phosphinic acid monomer and the electric field (in  $\text{MV cm}^{-1}$ ) along the bond calculated at B3LYP-D3/aug-cc-pVDZ level of theory using VPT2 method for the two cases namely, the effect on acid due to partner and the effect on partner due to acid respectively. For the

sake of convenience, the different possible dimers formed by different combinations of the monomeric units will be labelled with respect to the R groups as  $R_1R_2$ , i.e., dimer formed by combination of PA-2H and PA-BrCl will be labelled as (2H-BrCl).

| Dimer    | $\nu_{O-D}$              | $\Delta\nu_{O-D}$ | Field   | $\nu_{O-D}$              | $\Delta\nu_{O-D}$ | Field   |
|----------|--------------------------|-------------------|---------|--------------------------|-------------------|---------|
|          | On PA-2H due to partner  |                   |         | On partner due to PA-2H  |                   |         |
| 2H-2H    | 1855                     | -803              | -111.49 | 1865                     | -793              | -111.49 |
| 2H-HF    | 1981                     | -677              | -97.07  | 1546                     | -1117             | -114.63 |
| 2H-HCl   | 1979                     | -679              | -96.11  | 1591                     | -1061             | -115.58 |
| 2H-HBr   | 1972                     | -686              | -95.21  | 1594                     | -1059             | -115.70 |
| 2H-2F    | 1981                     | -677              | -85.48  | 1387                     | -1283             | -115.31 |
| 2H-2Cl   | 1967                     | -691              | -84.68  | 1337                     | -1305             | -116.11 |
| 2H-2Br   | 2005                     | -653              | -84.57  | 1336                     | -1297             | -114.34 |
| 2H-ClF   | 1995                     | -663              | -85.45  | 1346                     | -1312             | -116.10 |
| 2H-BrF   | 2012                     | -646              | -85.01  | 1374                     | -1277             | -116.37 |
| 2H-BrCl  | 2013                     | -645              | -84.19  | 1366                     | -1277             | -116.34 |
| 2H-HMe   | 1687                     | -971              | -125.06 | 1903                     | -764              | -112.69 |
| 2H-2Me   | 1575                     | -1083             | -133.17 | 1986                     | -684              | -108.68 |
| 2H-MeF   | 1900                     | -758              | -109.65 | 1704                     | -966              | -112.29 |
| 2H-MeCl  | 1918                     | -740              | -106.21 | 1731                     | -931              | -112.95 |
| 2H-MeBr  | 1937                     | -721              | -103.98 | 1707                     | -955              | -113.88 |
|          | On PA-HF due to partner  |                   |         | On partner due to PA-HF  |                   |         |
| HF-HF    | 1815                     | -848              | -98.58  | 1820                     | -843              | -98.56  |
| HF-2H    | 1546                     | -1117             | -114.63 | 1981                     | -677              | -97.07  |
| HF-HCl   | 1774                     | -890              | -97.62  | 1840                     | -812              | -98.94  |
| HF-HBr   | 1773                     | -890              | -96.82  | 1865                     | -788              | -98.93  |
| HF-2F    | 1946                     | -718              | -85.90  | 1654                     | -1016             | -99.35  |
| HF-2Cl   | 1911                     | -753              | -85.61  | 1648                     | -993              | -98.80  |
| HF-2Br   | 1900                     | -763              | -84.31  | 1633                     | -1001             | -98.75  |
| HF-ClF   | 1933                     | -730              | -86.03  | 1654                     | -1003             | -99.03  |
| HF-BrF   | 1925                     | -738              | -85.57  | 1653                     | -998              | -99.14  |
| HF-BrCl  | 1927                     | -736              | -84.74  | 1610                     | -1034             | -98.35  |
| HF-HMe   | 1332                     | -1331             | -126.95 | 1981                     | -686              | -94.58  |
| HF-2Me   | 1009                     | -1654             | -139.13 | 2052                     | -618              | -95.20  |
| HF-MeF   | 1631                     | -1032             | -110.99 | 1909                     | -761              | -97.83  |
| HF-MeCl  | 1623                     | -1040             | -108.46 | 1909                     | -754              | -98.30  |
| HF-MeBr  | 1629                     | -1035             | -107.06 | 1928                     | -734              | -98.36  |
|          | On PA-HCl due to partner |                   |         | On partner due to PA-HCl |                   |         |
| HCl-HCl  | 1838                     | -815              | -98.06  | 1839                     | -814              | -98.05  |
| HCl-2H   | 1591                     | -1061             | -115.58 | 1979                     | -679              | -96.11  |
| HCl-HF   | 1840                     | -812              | -98.94  | 1774                     | -890              | -97.62  |
| HCl-HBr  | 1825                     | -828              | -97.38  | 1836                     | -817              | -98.23  |
| HCl-2F   | 1987                     | -665              | -86.43  | 1603                     | -1067             | -98.84  |
| HCl-2Cl  | 1945                     | -708              | -86.63  | 1646                     | -996              | -98.04  |
| HCl-2Br  | 1910                     | -742              | -84.77  | 1703                     | -930              | -98.33  |
| HCl-ClF  | 1954                     | -699              | -86.61  | 1610                     | -1048             | -98.67  |
| HCl-BrF  | 1955                     | -697              | -86.31  | 1633                     | -1018             | -98.72  |
| HCl-BrCl | 1921                     | -731              | -85.70  | 1667                     | -977              | -98.51  |

|          |                          |       |         |                          |       |        |
|----------|--------------------------|-------|---------|--------------------------|-------|--------|
| HCl-HMe  | 1316                     | -1336 | -128.16 | 2002                     | -665  | -93.21 |
| HCl-2Me  | 1000                     | -1652 | -140.41 | 2055                     | -615  | -93.53 |
| HCl-MeF  | 1660                     | -993  | -111.34 | 1918                     | -752  | -96.32 |
| HCl-MeCl | 1671                     | -982  | -108.70 | 1918                     | -744  | -96.96 |
| HCl-MeBr | 1667                     | -985  | -107.26 | 1930                     | -731  | -96.87 |
|          | On PA-HBr due to partner |       |         | On partner due to PA-HBr |       |        |
| HBr-HBr  | 1843                     | -810  | -97.30  | 1840                     | -813  | -97.29 |
| HBr-2H   | 1594                     | -1059 | -115.70 | 1972                     | -686  | -95.21 |
| HBr-HF   | 1865                     | -788  | -98.93  | 1773                     | -890  | -96.82 |
| HBr-HCl  | 1836                     | -817  | -98.23  | 1825                     | -828  | -97.38 |
| HBr-2F   | 1992                     | -661  | -86.36  | 1604                     | -1067 | -98.24 |
| HBr-2Cl  | 1947                     | -706  | -86.60  | 1608                     | -1034 | -97.41 |
| HBr-2Br  | 1933                     | -720  | -84.86  | 1680                     | -953  | -97.61 |
| HBr-ClF  | 1968                     | -685  | -86.68  | 1615                     | -1043 | -98.06 |
| HBr-BrF  | 1961                     | -692  | -86.19  | 1638                     | -1012 | -98.05 |
| HBr-BrCl | 1931                     | -722  | -85.74  | 1672                     | -972  | -97.81 |
| HBr-HMe  | 1283                     | -1370 | -128.50 | 2001                     | -666  | -92.17 |
| HBr-2Me  | 967                      | -1686 | -140.63 | 901                      | -1769 | -92.57 |
| HBr-MeF  | 1737                     | -916  | -111.29 | 1903                     | -767  | -95.41 |
| HBr-MeCl | 1681                     | -972  | -108.73 | 1914                     | -748  | -96.00 |
| HBr-MeBr | 1701                     | -952  | -107.37 | 1917                     | -745  | -96.15 |
|          | On PA-2F due to partner  |       |         | On partner due to PA-2F  |       |        |
| 2F-2F    | 1881                     | -789  | -86.03  | 1880                     | -790  | -86.04 |
| 2F-2H    | 1387                     | -1283 | -115.31 | 1981                     | -677  | -85.48 |
| 2F-HF    | 1654                     | -1016 | -99.35  | 1946                     | -718  | -85.90 |
| 2F-HCl   | 1603                     | -1067 | -98.84  | 1987                     | -665  | -86.43 |
| 2F-HBr   | 1604                     | -1067 | -98.24  | 1992                     | -661  | -86.36 |
| 2F-2Cl   | 1719                     | -952  | -86.27  | 1922                     | -720  | -85.90 |
| 2F-2Br   | 1722                     | -948  | -84.84  | 1903                     | -730  | -85.78 |
| 2F-ClF   | 1827                     | -843  | -86.54  | 1909                     | -749  | -86.07 |
| 2F-BrF   | 1815                     | -855  | -86.03  | 1912                     | -739  | -86.21 |
| 2F-BrCl  | 1722                     | -948  | -85.44  | 1906                     | -738  | -85.34 |
| 2F-HMe   | 976                      | -1694 | -128.69 | 2171                     | -496  | -82.63 |
| 2F-2Me   | 600                      | -2070 | -140.80 | 2093                     | -578  | -85.70 |
| 2F-MeF   | 1452                     | -1218 | -112.25 | 1990                     | -680  | -85.62 |
| 2F-MeCl  | 1429                     | -1241 | -110.25 | 1998                     | -665  | -86.19 |
| 2F-MeBr  | 1434                     | -1236 | -108.89 | 2004                     | -658  | -86.17 |
|          | On PA-2Cl due to partner |       |         | On partner due to PA-2Cl |       |        |
| 2Cl-2Cl  | 1824                     | -818  | -86.67  | 1831                     | -811  | -86.67 |
| 2Cl-2H   | 1337                     | -1305 | -116.11 | 1967                     | -691  | -84.68 |
| 2Cl-HF   | 1648                     | -993  | -98.80  | 1911                     | -753  | -85.61 |
| 2Cl-HCl  | 1646                     | -996  | -98.04  | 1945                     | -708  | -86.63 |
| 2Cl-HBr  | 1608                     | -1034 | -97.41  | 1947                     | -706  | -86.60 |
| 2Cl-2F   | 1922                     | -720  | -85.90  | 1719                     | -952  | -86.27 |
| 2Cl-2Br  | 1789                     | -853  | -84.46  | 1850                     | -784  | -85.66 |
| 2Cl-ClF  | 1873                     | -768  | -85.77  | 1834                     | -824  | -85.86 |
| 2Cl-BrF  | 1859                     | -782  | -85.49  | 1804                     | -847  | -86.09 |
| 2Cl-BrCl | 1801                     | -840  | -85.39  | 1843                     | -801  | -85.85 |

|          |                          |       |         |                          |       |        |
|----------|--------------------------|-------|---------|--------------------------|-------|--------|
| 2Cl-HMe  | 1047                     | -1594 | -128.20 | 2044                     | -623  | -85.20 |
| 2Cl-2Me  | 613                      | -2029 | -141.38 | 2038                     | -632  | -84.33 |
| 2Cl-MeF  | 1460                     | -1182 | -111.71 | 1963                     | -707  | -85.01 |
| 2Cl-MeCl | 1450                     | -1191 | -109.60 | 1958                     | -705  | -85.59 |
| 2Cl-MeBr | 1397                     | -1244 | -107.90 | 1988                     | -674  | -85.78 |
|          | On PA-2Br due to partner |       |         | On partner due to PA-2Br |       |        |
| 2Br-2Br  | 1785                     | -848  | -85.43  | 1783                     | -851  | -85.43 |
| 2Br-2H   | 1336                     | -1297 | -114.34 | 2005                     | -653  | -84.57 |
| 2Br-HF   | 1633                     | -1001 | -98.75  | 1900                     | -763  | -84.31 |
| 2Br-HCl  | 1703                     | -930  | -98.33  | 1910                     | -742  | -84.77 |
| 2Br-HBr  | 1680                     | -953  | -97.61  | 1933                     | -720  | -84.86 |
| 2Br-2F   | 1903                     | -730  | -85.78  | 1722                     | -948  | -84.84 |
| 2Br-2Cl  | 1850                     | -784  | -85.66  | 1789                     | -853  | -84.46 |
| 2Br-ClF  | 1823                     | -811  | -86.60  | 1829                     | -829  | -85.34 |
| 2Br-BrF  | 1873                     | -761  | -86.03  | 1784                     | -867  | -85.62 |
| 2Br-BrCl | 1815                     | -819  | -84.76  | 1797                     | -847  | -84.09 |
| 2Br-HMe  | 985                      | -1648 | -128.71 | 2151                     | -515  | -80.89 |
| 2Br-2Me  | 262                      | -2372 | -140.69 | 2043                     | -627  | -83.35 |
| 2Br-MeF  | 1426                     | -1207 | -111.50 | 1964                     | -706  | -84.06 |
| 2Br-MeCl | 1413                     | -1220 | -109.19 | 1967                     | -696  | -84.40 |
| 2Br-MeBr | 1461                     | -1172 | -107.83 | 1968                     | -694  | -84.33 |
|          | On PA-ClF due to partner |       |         | On partner due to PA-ClF |       |        |
| ClF-ClF  | 1859                     | -798  | -86.22  | 1861                     | -797  | -85.81 |
| ClF-2H   | 1346                     | -1312 | -116.10 | 1995                     | -663  | -85.45 |
| ClF-HF   | 1654                     | -1003 | -99.03  | 1933                     | -730  | -86.03 |
| ClF-HCl  | 1610                     | -1048 | -98.67  | 1954                     | -699  | -86.61 |
| ClF-HBr  | 1615                     | -1043 | -98.06  | 1968                     | -685  | -86.68 |
| ClF-2F   | 1909                     | -749  | -86.07  | 1827                     | -843  | -86.54 |
| ClF-2Cl  | 1834                     | -824  | -85.86  | 1873                     | -768  | -85.77 |
| ClF-2Br  | 1829                     | -829  | -85.34  | 1823                     | -811  | -86.60 |
| ClF-BrF  | 1816                     | -842  | -85.44  | 1857                     | -793  | -86.59 |
| ClF-BrCl | 1756                     | -902  | -86.27  | 1847                     | -797  | -86.25 |
| ClF-HMe  | 1007                     | -1651 | -127.96 | 907                      | -1760 | -82.03 |
| ClF-2Me  | 448                      | -2210 | -140.22 | 2087                     | -583  | -84.74 |
| ClF-MeF  | 1476                     | -1181 | -111.91 | 1970                     | -700  | -85.84 |
| ClF-MeCl | 1439                     | -1219 | -109.63 | 1966                     | -696  | -86.31 |
| ClF-MeBr | 1438                     | -1220 | -108.34 | 2005                     | -657  | -86.35 |
|          | On PA-BrF due to partner |       |         | On partner due to PA-BrF |       |        |
| BrF-BrF  | 1847                     | -804  | -85.99  | 1854                     | -797  | -86.07 |
| BrF-2H   | 1374                     | -1277 | -116.37 | 2012                     | -646  | -85.01 |
| BrF-HF   | 1653                     | -998  | -99.14  | 1925                     | -738  | -85.57 |
| BrF-HCl  | 1633                     | -1018 | -98.72  | 1955                     | -697  | -86.31 |
| BrF-HBr  | 1638                     | -1012 | -98.05  | 1961                     | -692  | -86.19 |
| BrF-2F   | 1912                     | -739  | -86.21  | 1815                     | -855  | -86.03 |
| BrF-2Cl  | 1804                     | -847  | -86.09  | 1859                     | -782  | -85.49 |
| BrF-2Br  | 1784                     | -867  | -85.62  | 1873                     | -761  | -86.03 |
| BrF-ClF  | 1857                     | -793  | -86.59  | 1816                     | -842  | -85.44 |
| BrF-BrCl | 1828                     | -823  | -86.26  | 1836                     | -808  | -86.22 |

|           |                           |       |         |                           |       |         |
|-----------|---------------------------|-------|---------|---------------------------|-------|---------|
| BrF-HMe   | 1045                      | -1606 | -128.25 | 2158                      | -509  | -81.24  |
| BrF-2Me   | 404                       | -2247 | -140.43 | 2111                      | -559  | -83.69  |
| BrF-MeF   | 1489                      | -1162 | -112.05 | 1977                      | -693  | -85.16  |
| BrF-MeCl  | 1459                      | -1192 | -109.68 | 1988                      | -674  | -85.72  |
| BrF-MeBr  | 1474                      | -1177 | -108.30 | 2014                      | -647  | -85.65  |
|           | On PA-BrCl due to partner |       |         | On partner due to PA-BrCl |       |         |
| BrCl-BrCl | 1849                      | -795  | -85.57  | 1855                      | -789  | -85.58  |
| BrCl-2H   | 1366                      | -1277 | -116.34 | 2013                      | -645  | -84.19  |
| BrCl-HF   | 1610                      | -1034 | -98.35  | 1927                      | -736  | -84.74  |
| BrCl-HCl  | 1667                      | -977  | -98.51  | 1921                      | -731  | -85.70  |
| BrCl-HBr  | 1672                      | -972  | -97.81  | 1931                      | -722  | -85.74  |
| BrCl-2F   | 1906                      | -738  | -85.34  | 1722                      | -948  | -85.44  |
| BrCl-2Cl  | 1843                      | -801  | -85.85  | 1801                      | -840  | -85.39  |
| BrCl-2Br  | 1797                      | -847  | -84.09  | 1815                      | -819  | -84.76  |
| BrCl-ClF  | 1847                      | -797  | -86.25  | 1756                      | -902  | -86.27  |
| BrCl-BrF  | 1836                      | -808  | -86.22  | 1828                      | -823  | -86.26  |
| BrCl-HMe  | 894                       | -1750 | -130.00 | 2154                      | -512  | -80.69  |
| BrCl-2Me  | 362                       | -2282 | -140.61 | 2090                      | -581  | -83.70  |
| BrCl-MeF  | 1482                      | -1162 | -111.88 | 1954                      | -716  | -84.76  |
| BrCl-MeCl | 1438                      | -1206 | -109.42 | 1969                      | -694  | -85.17  |
| BrCl-MeBr | 1481                      | -1163 | -108.06 | 1982                      | -680  | -85.15  |
|           | On PA-HMe due to partner  |       |         | On partner due to PA-HMe  |       |         |
| HMe-HMe   | 1861                      | -806  | -122.97 | 1863                      | -803  | -122.96 |
| HMe-2H    | 1903                      | -764  | -112.69 | 1687                      | -971  | -125.06 |
| HMe-HF    | 1981                      | -686  | -94.58  | 1332                      | -1331 | -126.95 |
| HMe-HCl   | 2002                      | -665  | -93.21  | 1316                      | -1336 | -128.16 |
| HMe-HBr   | 2001                      | -666  | -92.17  | 1283                      | -1370 | -128.50 |
| HMe-2F    | 2171                      | -496  | -82.63  | 976                       | -1694 | -128.69 |
| HMe-2Cl   | 2044                      | -623  | -85.20  | 1047                      | -1594 | -128.20 |
| HMe-2Br   | 2151                      | -515  | -80.89  | 985                       | -1648 | -128.71 |
| HMe-ClF   | 2167                      | -500  | -82.03  | 1007                      | -1651 | -127.96 |
| HMe-BrF   | 2158                      | -509  | -81.24  | 1045                      | -1606 | -128.25 |
| HMe-BrCl  | 2154                      | -512  | -80.69  | 894                       | -1750 | -130.00 |
| HMe-2Me   | 1719                      | -948  | -134.20 | 1918                      | -752  | -121.87 |
| HMe-MeF   | 2028                      | -638  | -105.70 | 1534                      | -1136 | -125.25 |
| HMe-MeCl  | 2009                      | -658  | -102.61 | 1488                      | -1174 | -125.81 |
| HMe-MeBr  | 2014                      | -653  | -101.54 | 1522                      | -1139 | -125.76 |
|           | On PA-2Me due to partner  |       |         | On partner due to PA-2Me  |       |         |
| 2Me-2Me   | 1807                      | -863  | -129.01 | 1808                      | -863  | -129.00 |
| 2Me-2H    | 1986                      | -684  | -108.68 | 1575                      | -1083 | -133.17 |
| 2Me-HF    | 2052                      | -618  | -95.20  | 1009                      | -1654 | -139.13 |
| 2Me-HCl   | 2055                      | -615  | -93.53  | 1000                      | -1652 | -140.41 |
| 2Me-HBr   | 2059                      | -611  | -92.57  | 967                       | -1686 | -140.63 |
| 2Me-2F    | 2093                      | -578  | -85.70  | 600                       | -2070 | -140.80 |
| 2Me-2Cl   | 2038                      | -632  | -84.33  | 613                       | -2029 | -141.38 |
| 2Me-2Br   | 2043                      | -627  | -83.35  | 262                       | -2372 | -140.69 |
| 2Me-ClF   | 2087                      | -583  | -84.74  | 448                       | -2210 | -140.22 |
| 2Me-BrF   | 2111                      | -559  | -83.69  | 404                       | -2247 | -140.43 |

|           |                           |       |         |                           |       |         |
|-----------|---------------------------|-------|---------|---------------------------|-------|---------|
| 2Me-BrCl  | 2090                      | -581  | -83.70  | 362                       | -2282 | -140.61 |
| 2Me-HMe   | 1918                      | -752  | -121.87 | 1719                      | -948  | -134.20 |
| 2Me-MeF   | 1945                      | -725  | -105.85 | 1286                      | -1384 | -137.17 |
| 2Me-MeCl  | 1935                      | -735  | -102.93 | 1274                      | -1388 | -138.35 |
| 2Me-MeBr  | 1921                      | -750  | -101.35 | 1244                      | -1418 | -138.65 |
|           | On PA-MeF due to partner  |       |         | On partner due to PA-MeF  |       |         |
| MeF-MeF   | 1741                      | -929  | -109.91 | 1741                      | -929  | -109.91 |
| MeF-2H    | 1704                      | -966  | -112.29 | 1900                      | -758  | -109.65 |
| MeF-HF    | 1909                      | -761  | -97.83  | 1631                      | -1032 | -110.99 |
| MeF-HCl   | 1918                      | -752  | -96.32  | 1660                      | -993  | -111.34 |
| MeF-HBr   | 1903                      | -767  | -95.41  | 1737                      | -916  | -111.29 |
| MeF-2F    | 1990                      | -680  | -85.62  | 1452                      | -1218 | -112.25 |
| MeF-2Cl   | 1963                      | -707  | -85.01  | 1460                      | -1182 | -111.71 |
| MeF-2Br   | 1964                      | -706  | -84.06  | 1426                      | -1207 | -111.50 |
| MeF-ClF   | 1970                      | -700  | -85.84  | 1476                      | -1181 | -111.91 |
| MeF-BrF   | 1977                      | -693  | -85.16  | 1489                      | -1162 | -112.05 |
| MeF-BrCl  | 1954                      | -716  | -84.76  | 1482                      | -1162 | -111.88 |
| MeF-HMe   | 1534                      | -1136 | -125.25 | 2028                      | -638  | -105.70 |
| MeF-2Me   | 1286                      | -1384 | -137.17 | 1945                      | -725  | -105.85 |
| MeF-MeCl  | 1730                      | -940  | -107.26 | 1749                      | -913  | -110.55 |
| MeF-MeBr  | 1753                      | -917  | -105.76 | 1739                      | -923  | -110.81 |
|           | On PA-MeCl due to partner |       |         | On partner due to PA-MeCl |       |         |
| MeCl-MeCl | 1757                      | -906  | -107.63 | 1757                      | -906  | -107.62 |
| MeCl-2H   | 1731                      | -931  | -112.95 | 1918                      | -740  | -106.21 |
| MeCl-HF   | 1909                      | -754  | -98.30  | 1623                      | -1040 | -108.46 |
| MeCl-HCl  | 1918                      | -744  | -96.96  | 1671                      | -982  | -108.70 |
| MeCl-HBr  | 1914                      | -748  | -96.00  | 1681                      | -972  | -108.73 |
| MeCl-2F   | 1998                      | -665  | -86.19  | 1429                      | -1241 | -110.25 |
| MeCl-2Cl  | 1958                      | -705  | -85.59  | 1450                      | -1191 | -109.60 |
| MeCl-2Br  | 1967                      | -696  | -84.40  | 1413                      | -1220 | -109.19 |
| MeCl-ClF  | 1966                      | -696  | -86.31  | 1439                      | -1219 | -109.63 |
| MeCl-BrF  | 1988                      | -674  | -85.72  | 1459                      | -1192 | -109.68 |
| MeCl-BrCl | 1969                      | -694  | -85.17  | 1438                      | -1206 | -109.42 |
| MeCl-HMe  | 1488                      | -1174 | -125.81 | 2009                      | -658  | -102.61 |
| MeCl-2Me  | 1274                      | -1388 | -138.35 | 1935                      | -735  | -102.93 |
| MeCl-MeF  | 1749                      | -913  | -110.55 | 1730                      | -940  | -107.26 |
| MeCl-MeBr | 1733                      | -930  | -106.53 | 1748                      | -914  | -108.18 |
|           | On PA-MeBr due to partner |       |         | On partner due to PA-MeBr |       |         |
| MeBr-MeBr | 1773                      | -889  | -106.28 | 1756                      | -906  | -106.30 |
| MeBr-2H   | 1707                      | -955  | -113.88 | 1937                      | -721  | -103.98 |
| MeBr-HF   | 1928                      | -734  | -98.36  | 1629                      | -1035 | -107.06 |
| MeBr-HCl  | 1930                      | -731  | -96.87  | 1667                      | -985  | -107.26 |
| MeBr-HBr  | 1917                      | -745  | -96.15  | 1701                      | -952  | -107.37 |
| MeBr-2F   | 2004                      | -658  | -86.17  | 1434                      | -1236 | -108.89 |
| MeBr-2Cl  | 1988                      | -674  | -85.78  | 1397                      | -1244 | -107.90 |
| MeBr-2Br  | 1968                      | -694  | -84.33  | 1461                      | -1172 | -107.83 |

|               |      |       |         |      |       |         |
|---------------|------|-------|---------|------|-------|---------|
| MeBr-ClF      | 2005 | -657  | -86.35  | 1438 | -1220 | -108.34 |
| MeBr-BrF      | 2014 | -647  | -85.65  | 1474 | -1177 | -108.30 |
| MeBr-BrCl     | 1982 | -680  | -85.15  | 1481 | -1163 | -108.06 |
| MeBr-HMe      | 1522 | -1139 | -125.76 | 2014 | -653  | -101.54 |
| MeBr-2Me      | 1244 | -1418 | -138.65 | 1921 | -750  | -101.35 |
| MeBr-MeF      | 1739 | -923  | -110.81 | 1753 | -917  | -105.76 |
| MeBr-<br>MeCl | 1748 | -914  | -108.18 | 1733 | -930  | -106.53 |



**Table S7.** The harmonic vibrational frequencies (in  $\text{cm}^{-1}$ ) of the donor O-D stretch along with its vibrational shift (in  $\text{cm}^{-1}$ ) with respect to O-D stretch of the corresponding phosphinic acid monomer and the electric field (in  $\text{MV cm}^{-1}$ ) along the bond calculated at B3LYP-D3/TZVP level of theory for the two cases namely, the effect on acid due to partner and the effect on partner due to acid respectively. For the sake of convenience, the different possible dimers formed by different combinations of the monomeric units will be labelled with respect to the R groups as  $R_1R_2$ , i.e., dimer formed by combination of PA-HH and PA-ClF will be labelled as (2H-ClF).

| Dimer    | $\nu_{\text{O-D}}$       | $\Delta\nu_{\text{O-D}}$ | Field   | $\nu_{\text{O-D}}$       | $\Delta\nu_{\text{O-D}}$ | Field   |
|----------|--------------------------|--------------------------|---------|--------------------------|--------------------------|---------|
|          | On PA-2H due to partner  |                          |         | On partner due to PA-2H  |                          |         |
| 2H-2H    | 2194                     | -581                     | -120.50 | 2194                     | -581                     | -120.49 |
| 2H-HF    | 2317                     | -458                     | -104.13 | 1987                     | -783                     | -126.31 |
| 2H-HCl   | 2290                     | -485                     | -103.54 | 1999                     | -764                     | -126.75 |
| 2H-HBr   | 2303                     | -472                     | -101.88 | 2015                     | -748                     | -126.38 |
| 2H-2F    | 2385                     | -390                     | -92.58  | 1843                     | -938                     | -128.73 |
| 2H-2Cl   | 2375                     | -400                     | -91.26  | 1819                     | -936                     | -128.03 |
| 2H-2Br   | 2383                     | -392                     | -89.26  | 1835                     | -910                     | -128.78 |
| 2H-ClF   | 2376                     | -399                     | -92.07  | 1846                     | -923                     | -129.19 |
| 2H-BrF   | 2373                     | -402                     | -92.07  | 1863                     | -905                     | -128.95 |
| 2H-BrCl  | 2367                     | -408                     | -90.57  | 1841                     | -909                     | -128.89 |
| 2H-HMe   | 2112                     | -663                     | -132.36 | 2201                     | -577                     | -121.26 |
| 2H-2Me   | 2021                     | -754                     | -140.77 | 2256                     | -525                     | -118.25 |
|          | On PA-ClF due to partner |                          |         | On partner due to PA-ClF |                          |         |
| ClF-ClF  | 1846                     | -923                     | -129.19 | 2376                     | -399                     | -92.07  |
| ClF-2H   | 2068                     | -701                     | -109.76 | 2244                     | -526                     | -94.42  |
| ClF-HF   | 2048                     | -721                     | -108.51 | 2271                     | -492                     | -94.36  |
| ClF-HCl  | 2031                     | -738                     | -108.15 | 2285                     | -478                     | -94.20  |
| ClF-HBr  | 2206                     | -563                     | -95.51  | 2169                     | -612                     | -95.52  |
| ClF-2F   | 2162                     | -607                     | -94.78  | 2170                     | -585                     | -95.01  |
| ClF-2Cl  | 2147                     | -622                     | -93.67  | 2192                     | -553                     | -94.50  |
| ClF-2Br  | 2191                     | -578                     | -95.32  | 2189                     | -580                     | -95.32  |
| ClF-BrF  | 2181                     | -588                     | -95.40  | 2208                     | -560                     | -95.10  |
| ClF-BrCl | 2154                     | -615                     | -94.48  | 2162                     | -588                     | -94.80  |
| ClF-HMe  | 1695                     | -1074                    | -138.01 | 2452                     | -326                     | -89.46  |
| ClF-2Me  | 1493                     | -1276                    | -150.69 | 2443                     | -338                     | -91.16  |

**Table S8.** The harmonic vibrational frequencies (in  $\text{cm}^{-1}$ ) of the donor O-D stretch along with its vibrational shift (in  $\text{cm}^{-1}$ ) with respect to O-D stretch of the corresponding phosphinic acid monomer and the electric field (in  $\text{MV cm}^{-1}$ ) along the bond calculated at B2GP-PLYP-D3/def2-TZVP/CP level of theory for the two cases namely, the effect on acid due to partner and the effect on partner due to acid respectively. For the sake of convenience, the different possible dimers formed by different combinations of the monomeric units will be labelled with respect to the R groups as  $R_1R_2$ , i.e., dimer formed by combination of PA-HH and PA-ClF will be labelled as (2H-ClF).

| Dimer    | $\nu_{\text{O-D}}$       | $\Delta\nu_{\text{O-D}}$ | Field   | $\nu_{\text{O-D}}$       | $\Delta\nu_{\text{O-D}}$ | Field   |
|----------|--------------------------|--------------------------|---------|--------------------------|--------------------------|---------|
|          | On PA-2H due to partner  |                          |         | On partner due to PA-2H  |                          |         |
| 2H-2H    | 2286                     | -537                     | -133.67 | 2286                     | -537                     | -133.66 |
| 2H-HF    | 2412                     | -411                     | -113.48 | 2118                     | -699                     | -139.40 |
| 2H-HCl   | 2406                     | -417                     | -113.17 | 2127                     | -682                     | -139.80 |
| 2H-HBr   | 2435                     | -388                     | -111.47 | 2086                     | -721                     | -140.63 |
| 2H-2F    | 2481                     | -342                     | -100.09 | 2002                     | -827                     | -142.83 |
| 2H-2Cl   | 2463                     | -360                     | -101.17 | 1963                     | -835                     | -141.99 |
| 2H-2Br   | 2417                     | -406                     | -102.40 | 1999                     | -792                     | -141.88 |
| 2H-ClF   | 2458                     | -365                     | -102.04 | 1984                     | -834                     | -143.87 |
| 2H-BrF   | 2486                     | -337                     | -100.38 | 1987                     | -824                     | -144.10 |
| 2H-BrCl  | 2459                     | -364                     | -102.74 | 1973                     | -820                     | -142.78 |
| 2H-HMe   | 2229                     | -594                     | -143.79 | 2302                     | -520                     | -132.96 |
| 2H-2Me   | 2158                     | -665                     | -152.50 | 2321                     | -501                     | -130.41 |
|          | On PA-ClF due to partner |                          |         | On partner due to PA-ClF |                          |         |
| ClF-ClF  | 1983                     | -835                     | -143.86 | 2458                     | -365                     | -102.05 |
| ClF-2H   | 2185                     | -633                     | -121.17 | 2337                     | -480                     | -104.48 |
| ClF-HF   | 2170                     | -648                     | -121.67 | 2358                     | -451                     | -104.66 |
| ClF-HCl  | 2141                     | -677                     | -121.10 | 2383                     | -424                     | -104.04 |
| ClF-HBr  | 2337                     | -481                     | -104.18 | 2271                     | -558                     | -106.99 |
| ClF-2F   | 2268                     | -550                     | -108.39 | 2282                     | -516                     | -105.55 |
| ClF-2Cl  | 2206                     | -612                     | -109.48 | 2293                     | -498                     | -105.18 |
| ClF-2Br  | 2265                     | -553                     | -106.21 | 2318                     | -500                     | -106.21 |
| ClF-BrF  | 2264                     | -554                     | -104.95 | 2296                     | -515                     | -107.25 |
| ClF-BrCl | 2256                     | -562                     | -107.42 | 2267                     | -526                     | -105.90 |
| ClF-HMe  | 1895                     | -923                     | -152.70 | 2476                     | -346                     | -100.26 |
| ClF-2Me  | 1674                     | -1144                    | -166.38 | 2506                     | -316                     | -100.98 |

**Table S9.** Fitting parameters for linear least-square fits for the plots shown in Figures 3, 4, S3 and S4 for the O–H and O–D shifts of R due to R'.

|                | MP2 (Harmonic)      |          |                | MP2 (Harmonic)     |          |                | B3LYP (Harmonic)    |          |                | B3LYP (Anharmonic)  |          |                |
|----------------|---------------------|----------|----------------|--------------------|----------|----------------|---------------------|----------|----------------|---------------------|----------|----------------|
|                | O–H                 |          |                | O–D                |          |                | O–D                 |          |                | O–D                 |          |                |
|                | Slope               | Residual | R <sup>2</sup> | Slope              | Residual | R <sup>2</sup> | Slope               | Residual | R <sup>2</sup> | Slope               | Residual | R <sup>2</sup> |
| 2H             | 8.9                 | 20.9     | 0.995          | 6.2                | 15.5     | 0.994          | 7.0                 | 32.9     | 0.976          | 7.5                 | 87.3     | 0.853          |
| HF             | 11.2                | 89.3     | 0.971          | 7.7                | 49.1     | 0.978          | 9.2                 | 54.7     | 0.966          | 15.3                | 115.6    | 0.962          |
| HCl            | 11.8                | 87.0     | 0.976          | 8.2                | 48.9     | 0.982          | 9.6                 | 54.7     | 0.969          | 15.7                | 128.9    | 0.948          |
| HBr            | 12.0                | 88.7     | 0.975          | 8.3                | 50.2     | 0.980          | 9.7                 | 57.5     | 0.969          | 16.1                | 151.6    | 0.927          |
| 2F             | 14.4                | 145.1    | 0.955          | 9.8                | 84.3     | 0.965          | 12.2                | 100.8    | 0.951          | 19.0                | 181.0    | 0.921          |
| 2Cl            | 14.5                | 152.3    | 0.957          | 9.9                | 93.6     | 0.964          | 13.1                | 117.2    | 0.947          | 20.0                | 142.8    | 0.960          |
| 2Br            | 15.1                | 150.5    | 0.961          | 10.3               | 87.8     | 0.971          | 12.8                | 113.2    | 0.953          | 24.0                | 323.9    | 0.912          |
| ClF            | 14.2                | 169.0    | 0.947          | 9.7                | 103.2    | 0.957          | 12.4                | 113.9    | 0.946          | 21.7                | 249.8    | 0.926          |
| BrF            | 13.7                | 126.9    | 0.968          | 9.4                | 81.4     | 0.973          | 12.1                | 105.0    | 0.955          | 21.9                | 299.5    | 0.907          |
| BrCl           | 14.5                | 139.5    | 0.957          | 10.0               | 86.3     | 0.964          | 12.3                | 112.5    | 0.944          | 22.9                | 282.8    | 0.916          |
| HMe            | 8.1                 | 64.6     | 0.974          | 6.0                | 44.3     | 0.975          | 7.0                 | 48.5     | 0.963          | 7.6                 | 66.4     | 0.905          |
| 2Me            | 7.1                 | 17.1     | 0.994          | 5.3                | 22.3     | 0.987          | 6.3                 | 20.5     | 0.987          | 5.5                 | 65.5     | 0.817          |
| MeF            | 9.8                 | 53.1     | 0.980          | 6.9                | 40.6     | 0.978          | 8.0                 | 40.6     | 0.972          | 12.0                | 87.5     | 0.952          |
| MeCl           | 10.5                | 51.9     | 0.983          | 7.4                | 40.4     | 0.981          | 8.5                 | 38.7     | 0.975          | 12.3                | 81.5     | 0.946          |
| MeBr           | 10.8                | 47.5     | 0.987          | 7.7                | 37.6     | 0.985          | 8.8                 | 33.6     | 0.980          | 12.8                | 100.1    | 0.949          |
| <b>Average</b> | <b>11.8 (σ=2.6)</b> |          |                | <b>8.2 (σ=1.6)</b> |          |                | <b>10.0 (σ=2.4)</b> |          |                | <b>15.4 (σ=5.8)</b> |          |                |

**Table S10.** Fitting parameters for linear least-square fits for the plots shown in Figures 3, 4, S3 and S4 for the O–H and O–D shifts of R' due to R.

|     | MP2 (Harmonic) |          |                | MP2 (Harmonic) |          |                | B3LYP (Harmonic) |          |                | B3LYP (Anharmonic) |          |                |
|-----|----------------|----------|----------------|----------------|----------|----------------|------------------|----------|----------------|--------------------|----------|----------------|
|     | O–H            |          |                | O–D            |          |                | O–D              |          |                | O–D                |          |                |
|     | Slope          | Residual | R <sup>2</sup> | Slope          | Residual | R <sup>2</sup> | Slope            | Residual | R <sup>2</sup> | Slope              | Residual | R <sup>2</sup> |
| 2H  | 44.5           | 84.0     | 0.925          | 31.8           | 60.9     | 0.923          | 57.9             | 107.1    | 0.789          | 86.1               | 210.3    | 0.738          |
| HF  | 45.4           | 79.7     | 0.885          | 32.8           | 55.4     | 0.883          | 68.1             | 83.0     | 0.754          | 73.3               | 166.4    | 0.472          |
| HCl | 39.8           | 83.9     | 0.914          | 28.7           | 58.1     | 0.913          | 62.3             | 65.7     | 0.875          | 71.5               | 106.2    | 0.696          |
| HBr | 38.7           | 82.8     | 0.917          | 27.9           | 57.3     | 0.917          | 60.1             | 98.2     | 0.888          | 68.8               | 761.4    | 0.728          |
| 2F  | 48.0           | 100.3    | 0.794          | 34.9           | 69.5     | 0.807          | 57.4             | 167.4    | 0.288          | 52.9               | 105.5    | 0.391          |
| 2Cl | 46.3           | 105.5    | 0.83           | 33.9           | 72.9     | 0.84           | 101.             | 164.3    | 0.41           | 68.2               | 166.4    | 0.23           |

|                |                                       |       |           |                                       |       |           |                                        |       |           |                                        |       |           |
|----------------|---------------------------------------|-------|-----------|---------------------------------------|-------|-----------|----------------------------------------|-------|-----------|----------------------------------------|-------|-----------|
|                |                                       |       | 3         |                                       |       | 9         | 2                                      |       | 0         |                                        |       | 3         |
| 2Br            | 48.4                                  | 107.9 | 0.86<br>7 | 35.2                                  | 74.7  | 0.87<br>8 | 73.6                                   | 127.4 | 0.53<br>3 | 75.2                                   | 157.8 | 0.52<br>5 |
| ClF            | 43.0                                  | 88.8  | 0.86<br>2 | 31.1                                  | 61.6  | 0.86<br>8 | 62.0                                   | 192.9 | 0.49<br>8 | 59.6                                   | 421.2 | 0.54<br>5 |
| BrF            | 43.4                                  | 96.4  | 0.81<br>7 | 31.7                                  | 67.6  | 0.82<br>7 | 60.8                                   | 101.8 | 0.58<br>1 | 56.6                                   | 122.0 | 0.52<br>3 |
| BrCl           | 44.1                                  | 113.5 | 0.86<br>7 | 31.9                                  | 79.2  | 0.87<br>1 | 63.1                                   | 122.8 | 0.61<br>2 | 65.2                                   | 170.5 | 0.55<br>3 |
| HMe            | 55.2                                  | 130.1 | 0.93<br>1 | 37.9                                  | 84.6  | 0.94<br>0 | 76.4                                   | 130.6 | 0.86<br>0 | 133.<br>4                              | 181.3 | 0.89<br>1 |
| 2Me            | 55.7                                  | 177.2 | 0.89<br>6 | 37.4                                  | 104.1 | 0.90<br>9 | 68.2                                   | 174.0 | 0.76<br>2 | 130.<br>4                              | 516.0 | 0.67<br>6 |
| MeF            | 44.8                                  | 98.6  | 0.90<br>7 | 31.3                                  | 69.8  | 0.90<br>4 | 61.1                                   | 96.5  | 0.83<br>4 | 79.6                                   | 170.6 | 0.73<br>1 |
| MeCl           | 43.6                                  | 80.9  | 0.92<br>8 | 30.5                                  | 59.2  | 0.92<br>4 | 57.5                                   | 66.0  | 0.89<br>0 | 76.1                                   | 141.7 | 0.79<br>3 |
| MeBr           | 42.5                                  | 75.8  | 0.93<br>5 | 29.7                                  | 54.2  | 0.93<br>0 | 56.6                                   | 66.2  | 0.90<br>5 | 75.2                                   | 130.3 | 0.80<br>9 |
| <b>Average</b> | <b>45.6 (<math>\sigma=4.8</math>)</b> |       |           | <b>32.4 (<math>\sigma=2.9</math>)</b> |       |           | <b>65.7 (<math>\sigma=11.5</math>)</b> |       |           | <b>78.1 (<math>\sigma=23.5</math>)</b> |       |           |

**Table S11.** Fitting parameters for linear least-square fits for the plots shown in Figure S5 for the harmonic O–D shifts of R due to R' as well as R' due to R. The values shown in parenthesis were calculated at MP2/aug-cc-pVDZ level.

|     | B3LYP/TZVP  |          |                |             |          |                | B2GP-PLYP-D3/def2-TZVP/CP |          |                |                |          |                |
|-----|-------------|----------|----------------|-------------|----------|----------------|---------------------------|----------|----------------|----------------|----------|----------------|
|     | R due to R' |          |                | R' due to R |          |                | R due to R'               |          |                | R' due to R    |          |                |
|     | Slope       | Residual | R <sup>2</sup> | Slope       | Residual | R <sup>2</sup> | Slope                     | Residual | R <sup>2</sup> | Slope          | Residual | R <sup>2</sup> |
| 2H  | 6.8         | 24.9     | 0.987          | 39.5        | 64.5     | 0.937          | 5.8<br>(6.2)              | 44.9     | 0.972          | 27.6<br>(31.8) | 51.0     | 0.957          |
| ClF | 11.4        | 53.0     | 0.972          | 50.1        | 43.7     | 0.917          | 9.1<br>(9.7)              | 63.4     | 0.965          | 33.0<br>(31.1) | 35.1     | 0.917          |

**Table S12.** Comparison of O–H vibrational frequency shifts for various phosphinic acid dimer in presence of an external electric field equivalent to the value in the hydrogen-bonded dimer against the corresponding red-shift in the hydrogen-bonded dimer.

| 2H     |        | HF      |        | HCl     |        | HBr     |        |
|--------|--------|---------|--------|---------|--------|---------|--------|
| -556.6 | -100.4 | -587.4  | -75.8  | -588.5  | -77.8  | -587.8  | -78.1  |
| -432.8 | -80.0  | -756.3  | -100.3 | -746.5  | -100.3 | -736.7  | -99.5  |
| -450.0 | -81.4  | -614.1  | -78.6  | -558.9  | -75.7  | -547.6  | -76.4  |
| -455.8 | -81.0  | -620.0  | -78.1  | -595.4  | -77.4  | -578.4  | -78.1  |
| -332.1 | -64.5  | -484.1  | -59.2  | -445.6  | -58.9  | -428.7  | -59.5  |
| -376.9 | -70.5  | -538.6  | -65.8  | -494.5  | -65.8  | -475.1  | -65.9  |
| -380.5 | -70.5  | -557.2  | -66.3  | -525.6  | -65.8  | -510.5  | -66.4  |
| -338.4 | -65.9  | -508.4  | -62.1  | -472.9  | -61.8  | -456.8  | -62.8  |
| -343.3 | -65.9  | -513.9  | -62.6  | -481.3  | -62.6  | -463.2  | -63.3  |
| -375.4 | -69.1  | -552.2  | -66.3  | -502.6  | -65.8  | -502.1  | -66.4  |
| -651.4 | -114.7 | -885.2  | -116.8 | -873.4  | -116.3 | -872.3  | -114.9 |
| -720.4 | -125.5 | -1038.4 | -133.1 | -1038.5 | -131.6 | -1037.8 | -129.4 |
| -507.8 | -93.6  | -674.6  | -89.5  | -645.9  | -89.5  | -628.2  | -88.4  |
| -506.7 | -92.3  | -702.1  | -90.1  | -672.0  | -89.1  | -661.0  | -89.4  |
| -502.3 | -89.5  | -705.1  | -89.0  | -679.2  | -88.9  | -667.7  | -88.4  |
| HMe    |        | 2F      |        | BrF     |        | MeF     |        |
| -555.6 | -94.7  | -547.0  | -52.5  | -537.8  | -57.2  | -616.2  | -69.5  |
| -557.8 | -86.2  | -881.3  | -97.4  | -856.4  | -92.3  | -666.1  | -77.4  |
| -368.2 | -64.2  | -671.8  | -70.6  | -642.7  | -69.6  | -537.8  | -58.6  |
| -373.6 | -64.6  | -711.7  | -74.1  | -673.8  | -71.7  | -558.1  | -59.9  |
| -375.2 | -63.8  | -722.0  | -74.1  | -678.6  | -71.7  | -562.2  | -59.5  |
| -271.6 | -51.0  | -621.8  | -59.8  | -525.1  | -54.5  | -452.6  | -44.2  |
| -286.8 | -55.9  | -644.0  | -60.4  | -570.7  | -60.1  | -497.5  | -50.1  |
| -299.3 | -55.9  | -580.5  | -56.3  | -584.5  | -61.3  | -508.9  | -50.1  |
| -280.9 | -64.2  | -588.0  | -56.8  | -562.4  | -58.6  | -473.5  | -47.6  |
| -273.3 | -53.5  | -633.5  | -59.5  | -573.2  | -60.8  | -477.4  | -47.6  |
| -292.4 | -55.9  | -1074.0 | -118.1 | -981.3  | -105.6 | -501.4  | -50.1  |
| -633.1 | -105.2 | -1299.4 | -141.2 | -1222.6 | -119.3 | -791.3  | -91.3  |
| -405.2 | -74.4  | -787.5  | -85.3  | -756.1  | -82.0  | -926.1  | -103.9 |
| -409.3 | -73.9  | -829.5  | -86.6  | -772.1  | -82.0  | -642.6  | -69.7  |
| -412.5 | -73.1  | -831.7  | -85.3  | -785.2  | -81.2  | -644.9  | -69.2  |
