# Supplementary material for: Anharmonicity and vibrational Stark fields in phosphinic acid dimers
Source: Royal Society of Chemistry journal article supplement (doi:10.1039/d4cp03394a), 2025-01-01
Supplement: d4cp03394a2.pdf [file d4cp03394a2.pdf]

## **Electronic supplementary information -2 for**

### **Anharmonicity and Vibrational Stark Fields in Phosphinic Acid Dimers**

Manjusha Boda,<sup>†</sup> Arzoo and G. Naresh Patwari\*

Department of Chemistry, Indian Institute of Technology Bombay, Mumbai 400076, India. Email: naresh@chem.iitb.ac.in

<sup>†</sup>Present address: School of Chemistry, University of Hyderabad, Hyderabad 500046, India

**Cartesian coordinates of various hydrogen bonded phosphinic acid dimers considered in the present investigation at MP2/aug-cc-pVDZ level of theory. For the sake of convenience, the different possible dimers formed by different combinations of the monomeric units will be labelled with respect to only the R groups as R<sub>1</sub>R<sub>2</sub> in the rest of the manuscript, i.e., dimer formed by combination of PA-2H and PA-BrCl will be labelled as (2H-BrCl) only.**

| <b>2H-2H</b>                             | <b>2H-HF</b>                             | <b>2H-HCl</b>                           |
|------------------------------------------|------------------------------------------|-----------------------------------------|
| P 1.96450700 0.06215900<br>0.16139000    | P 1.69058400 -0.03462200 -<br>0.34281300 | P -1.35037000 0.20525000<br>0.69808400  |
| O 1.11774800 1.34486300<br>0.23716200    | O 0.76205900 -1.19988500 -<br>0.64268700 | O -0.43790900 -0.88489700<br>1.25426500 |
| H 2.32418100 -0.38872000<br>1.45479100   | H 2.76799700 0.10797300 -<br>1.22867200  | H -2.42430500 0.55963500<br>1.53240000  |
| H 3.18992700 0.21744500 -<br>0.52213400  | O 1.07576200 1.42936200 -<br>0.22262700  | O -0.70604300 1.62151900<br>0.32314800  |
| O 1.34665200 -1.21744800 -<br>0.61554500 | H 0.07135800 1.41876800 -<br>0.01247300  | H 0.22204900 1.50162300 -<br>0.09934700 |
| H 0.38939100 -1.36540200 -<br>0.32723800 | P -2.25778100 0.07841500 -<br>0.04484200 | P 2.45337100 0.01225300 -<br>0.15025600 |
| P -1.96454700 -0.06223100                | O -1.42988700 1.33201500                 | O 1.60691600 1.17966400 -               |

|                                                                                                                                                                                                                                                                                                                                                                                                               |                                                                                                                                                                                                                                                                                                                                                                                                               |                                                                                                                                                                                                                                                                                                                                                                                                                    |
|---------------------------------------------------------------------------------------------------------------------------------------------------------------------------------------------------------------------------------------------------------------------------------------------------------------------------------------------------------------------------------------------------------------|---------------------------------------------------------------------------------------------------------------------------------------------------------------------------------------------------------------------------------------------------------------------------------------------------------------------------------------------------------------------------------------------------------------|--------------------------------------------------------------------------------------------------------------------------------------------------------------------------------------------------------------------------------------------------------------------------------------------------------------------------------------------------------------------------------------------------------------------|
| 0.16128800<br>O -1.11761000 -1.34481600<br>0.23736100<br>H -3.18967400 -0.21773600 -<br>0.52271600<br>H -2.32480500 0.38851800<br>1.45456400<br>O -1.34666100 1.21756300 -<br>0.61529700<br>H -0.38945400 1.36568600 -<br>0.32688800                                                                                                                                                                          | 0.28842000<br>H -3.51324000 0.05548100<br>0.59532300<br>H -2.53710400 -0.01532200 -<br>1.42976700<br>O -1.66753700 -1.36900500<br>0.38912400<br>H -0.73081500 -1.45275700<br>0.04460300<br>F 2.50295300 -0.25677100<br>1.03866400                                                                                                                                                                             | 0.68929900<br>H 3.58889000 -0.25908400 -<br>0.93971300<br>H 2.94803100 0.27654900<br>1.14983200<br>O 1.77522200 -1.45971900 -<br>0.07717100<br>H 0.91164300 -1.39605700<br>0.42848700<br>Cl -2.33510600 -0.44692700 -<br>0.98686000                                                                                                                                                                                |
| <b>2H-HBr</b><br>P -0.76111600 0.97080700<br>0.55223100<br>O 0.14584600 0.41375400<br>1.64910800<br>H -1.70812500 1.91290300<br>0.99281700<br>O -0.08342000 1.71479400 -<br>0.69555700<br>H 0.74879900 1.20249800 -<br>1.00848900<br>P 2.83159600 -0.29959400 -<br>0.21441900<br>O 1.98607400 0.33904700 -<br>1.33117100<br>H 3.79918300 -1.20232500 -<br>0.69943000<br>H 3.55259600 0.67200500<br>0.52107500 | <b>2H-2F</b><br>P -1.40381300 -0.06636000<br>0.03630500<br>O -0.48157700 -1.19302100<br>0.42485000<br>O -0.82137000 1.34386000 -<br>0.35690800<br>H 0.21398300 1.35616600 -<br>0.32237800<br>P 2.51011400 0.11059700<br>0.19892200<br>O 1.70418200 1.33221400 -<br>0.27887500<br>H 3.85831700 0.15055200 -<br>0.20643800<br>H 2.53020200 0.00998000<br>1.60995200<br>O 2.07565200 -1.35745600 -<br>0.34484400 | <b>2H-2Cl</b><br>P 0.93946700 -0.08201800 -<br>0.03793300<br>O 0.04667800 -0.52082100 -<br>1.18649100<br>O 0.30823800 0.05586300<br>1.41759100<br>H -0.69346800 0.30995300<br>1.35147700<br>P -2.94845600 0.16455400 -<br>0.05031900<br>O -2.14997100 0.64239300<br>1.17662600<br>H -4.29488600 -0.13181700<br>0.24204800<br>H -2.98274500 1.14859200 -<br>1.06623800<br>O -2.48698600 -1.21360600 -<br>0.77478500 |

|                                                                                                                                                                                                                                                                                                                                                                                                                                                                                                                                               |                                                                                                                                                                                                                                                                                                                                                                                                                                                                                                                                        |                                                                                                                                                                                                                                                                                                                                                                                                                                                                                                                                   |
|-----------------------------------------------------------------------------------------------------------------------------------------------------------------------------------------------------------------------------------------------------------------------------------------------------------------------------------------------------------------------------------------------------------------------------------------------------------------------------------------------------------------------------------------------|----------------------------------------------------------------------------------------------------------------------------------------------------------------------------------------------------------------------------------------------------------------------------------------------------------------------------------------------------------------------------------------------------------------------------------------------------------------------------------------------------------------------------------------|-----------------------------------------------------------------------------------------------------------------------------------------------------------------------------------------------------------------------------------------------------------------------------------------------------------------------------------------------------------------------------------------------------------------------------------------------------------------------------------------------------------------------------------|
| O 2.07987400 -1.22342800<br>0.88711900<br>H 1.31504900 -0.70800300<br>1.28152200<br>Br -2.05119100 -0.62567500 -<br>0.29230500                                                                                                                                                                                                                                                                                                                                                                                                                | H 1.11494000 -1.49814600 -<br>0.13126100<br>F -2.40101600 -0.43541300 -<br>1.15255400<br>F -2.50198800 0.24798200<br>1.14899200                                                                                                                                                                                                                                                                                                                                                                                                        | H -1.52365500 -1.13196400 -<br>1.01999200<br>Cl 1.81983200 1.71325400 -<br>0.45995600<br>Cl 2.52639800 -1.30992600<br>0.26895400                                                                                                                                                                                                                                                                                                                                                                                                  |
| <b>2H-2Br</b><br>P 0.33269200 -0.15703300 -<br>0.03548800<br>O -0.53830400 -0.46352600 -<br>1.24683100<br>O -0.29676700 -0.33046600<br>1.42185900<br>H -1.30202700 -0.08036600<br>1.40210700<br>P -3.54070900 -0.05148400 -<br>0.02228100<br>O -2.76318600 0.25862600<br>1.27044500<br>H -4.88241000 -0.41629600<br>0.20829400<br>H -3.58873700 1.06948200 -<br>0.88410200<br>O -3.04205000 -1.29901400 -<br>0.93477200<br>H -2.08236200 -1.15371200 -<br>1.16527600<br>Br 2.14266900 -1.39186000<br>0.07061200<br>Br 1.08871000 1.91710800 - | <b>2H-ClF</b><br>P 1.14126500 -0.24662300<br>0.29469500<br>O 0.21956200 0.48039200<br>1.24916100<br>O 0.54461900 -1.34413300 -<br>0.67970200<br>H -0.46244700 -1.16995300 -<br>0.85265500<br>P -2.72517900 -0.07126200 -<br>0.00933500<br>O -1.90865400 -0.84520500 -<br>1.06084700<br>H -4.01156300 0.27701500 -<br>0.46444400<br>H -2.91796800 -0.82482100<br>1.17239700<br>O -2.17658000 1.37982900<br>0.47529500<br>H -1.25376500 1.25955100<br>0.82637900<br>F 2.30256400 -1.05398600<br>1.04240300<br>Cl 2.24998800 1.02031100 - | <b>2H-BrF</b><br>P -0.65166700 0.74640700<br>0.22618200<br>O 0.26189800 0.45025600<br>1.39757700<br>O -0.01889100 1.20312000 -<br>1.15565800<br>H 0.92130300 0.78477100 -<br>1.27303200<br>P 3.09283900 -0.18230000 -<br>0.08777000<br>O 2.26928900 0.12788700 -<br>1.35146300<br>H 4.25576500 -0.92781000 -<br>0.36195500<br>H 3.52710100 0.99565700<br>0.56448900<br>O 2.41364800 -1.10316600<br>1.06652300<br>H 1.56293200 -0.67075700<br>1.34835000<br>F -1.68143700 1.93705700<br>0.52120300<br>Br -2.03312300 -0.90005000 - |

|                                                                                                                                                                                                                                                                                                                                                                                                                                                                                                                                                      |                                                                                                                                                                                                                                                                                                                                                                                                                                                                                                                                                                                                                                        |                                                                                                                                                                                                                                                                                                                                                                                                                                                                                                                                                                                                                                         |
|------------------------------------------------------------------------------------------------------------------------------------------------------------------------------------------------------------------------------------------------------------------------------------------------------------------------------------------------------------------------------------------------------------------------------------------------------------------------------------------------------------------------------------------------------|----------------------------------------------------------------------------------------------------------------------------------------------------------------------------------------------------------------------------------------------------------------------------------------------------------------------------------------------------------------------------------------------------------------------------------------------------------------------------------------------------------------------------------------------------------------------------------------------------------------------------------------|-----------------------------------------------------------------------------------------------------------------------------------------------------------------------------------------------------------------------------------------------------------------------------------------------------------------------------------------------------------------------------------------------------------------------------------------------------------------------------------------------------------------------------------------------------------------------------------------------------------------------------------------|
| 0.15004300                                                                                                                                                                                                                                                                                                                                                                                                                                                                                                                                           | 0.83617500                                                                                                                                                                                                                                                                                                                                                                                                                                                                                                                                                                                                                             | 0.19144800                                                                                                                                                                                                                                                                                                                                                                                                                                                                                                                                                                                                                              |
| <b>2H-BrCl</b><br>P 0.62699200 0.57132000 -<br>0.08021900<br>O -0.27687000 0.66697800 -<br>1.30036500<br>O 0.01156800 0.91133700<br>1.35193300<br>H -0.96813900 0.57252700<br>1.39563500<br>P -3.20076500 0.11053000<br>0.04608900<br>O -2.37769800 0.05403000<br>1.34685700<br>H -4.45088000 -0.52802600<br>0.16145900<br>H -3.47685000 1.44122100 -<br>0.34793300<br>O -2.60644000 -0.62842900 -<br>1.27294400<br>H -1.70061200 -0.25477300 -<br>1.45781600<br>Br 1.52374200 -1.43905300<br>0.08277100<br>Cl 2.22750700 1.81628500 -<br>0.18472000 | <b>2H-HMe</b><br>P -2.32631400 0.09178700<br>0.20397000<br>O -1.56392500 1.33785300 -<br>0.28044700<br>H -3.67043100 0.05665900 -<br>0.22389500<br>H -2.38702100 0.03072900<br>1.61833000<br>O -1.80689300 -1.36140500 -<br>0.28493100<br>H -0.80940000 -1.43675800 -<br>0.09699800<br>P 1.53132300 -0.08841300 -<br>0.27569100<br>O 0.72102600 -1.29021300<br>0.25303600<br>H 1.55676200 -0.07493900 -<br>1.69441900<br>O 1.01549600 1.38939700<br>0.15883100<br>H 0.01987400 1.46494400<br>0.00564100<br>C 3.25215100 -0.07750800<br>0.26159000<br>H 3.76646900 0.79450400 -<br>0.16771300<br>H 3.27129700 -0.01840000<br>1.35940200 | <b>2H-2Me</b><br>P 1.37408900 -0.07791500<br>0.05098400<br>O 0.52356200 -1.16445900<br>0.75043600<br>O 0.76533400 0.51584900 -<br>1.34221800<br>H -0.16681400 0.84167200 -<br>1.16782000<br>P -2.49681400 0.10330000<br>0.09472900<br>O -1.63342800 1.23558600 -<br>0.49138500<br>H -2.80417200 0.35581300<br>1.45520500<br>H -3.75386600 -0.05164300 -<br>0.53140700<br>O -1.92412100 -1.40530900<br>0.02216600<br>H -0.94378100 -1.40525900<br>0.31610800<br>C 2.98908300 -0.68727200 -<br>0.48657500<br>C 1.63233700 1.34964200<br>1.14220000<br>H 2.82749900 -1.51870700 -<br>1.18760500<br>H 3.54819100 0.11668900 -<br>0.98674300 |

|                                                                                                                                                                                                                                                                                                                                                                                                                                                                                               |                                                                                                                                                                                                                                                                                                                                                                                                                                                                                              |                                                                                                                                                                                                                                                                                                                                                                                                                                                                                      |
|-----------------------------------------------------------------------------------------------------------------------------------------------------------------------------------------------------------------------------------------------------------------------------------------------------------------------------------------------------------------------------------------------------------------------------------------------------------------------------------------------|----------------------------------------------------------------------------------------------------------------------------------------------------------------------------------------------------------------------------------------------------------------------------------------------------------------------------------------------------------------------------------------------------------------------------------------------------------------------------------------------|--------------------------------------------------------------------------------------------------------------------------------------------------------------------------------------------------------------------------------------------------------------------------------------------------------------------------------------------------------------------------------------------------------------------------------------------------------------------------------------|
|                                                                                                                                                                                                                                                                                                                                                                                                                                                                                               | H 3.73878100 -1.00736400 -<br>0.06598100                                                                                                                                                                                                                                                                                                                                                                                                                                                     | H 3.54658200 -1.05189800<br>0.38857000<br>H 2.06488600 1.01120500<br>2.09526100<br>H 2.29353900 2.08448200<br>0.65986200<br>H 0.64950100 1.80930500<br>1.32713300                                                                                                                                                                                                                                                                                                                    |
| <b>2H-MeF</b><br>P 1.41458200 0.06711100<br>0.03754500<br>O 0.52182500 1.25277800<br>0.38345600<br>O 0.76115800 -1.15180000 -<br>0.76565900<br>H -0.23666900 -1.24924100 -<br>0.58548100<br>P -2.56775900 -0.07766200<br>0.13687500<br>O -1.77045600 -1.31987700 -<br>0.29601200<br>H -3.87097600 -0.02485700 -<br>0.40112000<br>H -2.74512700 -0.03583500<br>1.54106300<br>O -2.00166400 1.37948400 -<br>0.29099200<br>H -1.02625800 1.43963400 -<br>0.04788300<br>C 2.93673900 0.44240900 - | <b>2H-MeCl</b><br>P 1.20592200 -0.38507700<br>0.05138400<br>O 0.33583200 -1.04608100 -<br>1.01785200<br>O 0.56718300 -0.17120600<br>1.50892000<br>H -0.38958900 0.17413800<br>1.44154000<br>P -2.64063200 0.27748200 -<br>0.06972500<br>O -1.85029500 0.67361500<br>1.18948900<br>H -4.02226700 0.10742400<br>0.15921600<br>H -2.54898900 1.27183200 -<br>1.07395600<br>O -2.27664600 -1.12754800 -<br>0.79063300<br>H -1.28276800 -1.17745500 -<br>0.94382700<br>Cl 1.74095900 1.51633800 - | <b>2H-MeBr</b><br>P -0.88702100 0.88224800 -<br>0.03198600<br>O -0.02929600 1.24649600 -<br>1.24404700<br>O -0.27375400 1.12601600<br>1.43316800<br>H 0.66292500 0.72525500<br>1.49058200<br>P 2.69076600 -0.39174800<br>0.05252500<br>O 2.07275600 0.05452400<br>1.38911600<br>H 4.09383700 -0.52768000<br>0.10105600<br>H 2.20332100 -1.65891600 -<br>0.35052500<br>O 2.52352700 0.58217100 -<br>1.23235500<br>H 1.56351000 0.86912500 -<br>1.32618800<br>C -2.50837100 1.66069300 |

|                                                                                                                                                                                                                                                                                                                                                                                                                                                            |                                                                                                                                                                                                                                                                                                                                                                                                                                                           |                                                                                                                                                                                                                                                                                                                                                                                                                                                              |
|------------------------------------------------------------------------------------------------------------------------------------------------------------------------------------------------------------------------------------------------------------------------------------------------------------------------------------------------------------------------------------------------------------------------------------------------------------|-----------------------------------------------------------------------------------------------------------------------------------------------------------------------------------------------------------------------------------------------------------------------------------------------------------------------------------------------------------------------------------------------------------------------------------------------------------|--------------------------------------------------------------------------------------------------------------------------------------------------------------------------------------------------------------------------------------------------------------------------------------------------------------------------------------------------------------------------------------------------------------------------------------------------------------|
| 0.83351300<br>H 2.68092700 0.87819100 -<br>1.80913100<br>H 3.51376300 1.16618200 -<br>0.24185600<br>H 3.51183900 -0.48302400 -<br>0.97292700<br>F 1.97364600 -0.60799200<br>1.40619700                                                                                                                                                                                                                                                                     | 0.58691900<br>C 2.78321200 -1.18703600<br>0.37396900<br>H 2.57547100 -2.19544400<br>0.76136900<br>H 3.34208800 -1.25254400 -<br>0.56948000<br>H 3.34253700 -0.59979900<br>1.11467800                                                                                                                                                                                                                                                                      | 0.03236800<br>H -2.35638400 2.74732000<br>0.11786400<br>H -3.04590100 1.42513000 -<br>0.89619700<br>H -3.05512600 1.27982200<br>0.90550600<br>Br -1.32622900 -1.32158200 -<br>0.09461300                                                                                                                                                                                                                                                                     |
| <b>HF-HF</b><br>P -2.01005900 -0.06058600<br>0.39519800<br>O -1.09864500 -1.27433800<br>0.45020100<br>H -2.97207200 0.00773700<br>1.41169000<br>O -1.35754700 1.39457700<br>0.36760100<br>H -0.39667900 1.38197900<br>0.04705000<br>P 2.01065600 0.05960400 -<br>0.39527400<br>O 1.09802900 1.27206300 -<br>0.45782400<br>H 2.97542500 -0.01167000 -<br>1.40897200<br>O 1.35924400 -1.39573900 -<br>0.36256200<br>H 0.39653400 -1.38202200 -<br>0.04638500 | <b>HF-HCl</b><br>P -2.16197500 -0.05418100 -<br>0.50522400<br>O -1.25493200 1.14898500 -<br>0.69840900<br>H -2.96592400 -0.37484300 -<br>1.60723900<br>O -1.51833000 -1.44705400 -<br>0.06988200<br>H -0.62513500 -1.33503200<br>0.39881100<br>P 1.66172000 0.11252800<br>0.74436600<br>O 0.75836300 -1.06155100<br>1.10964900<br>H 2.69089800 0.37182700<br>1.66413900<br>O 0.99537700 1.55712000<br>0.54318800<br>H 0.10981100 1.47691500<br>0.05957900 | <b>HF-HBr</b><br>P -2.51891800 -0.60098800 -<br>0.15702500<br>O -1.63452400 -0.19516200 -<br>1.32355500<br>H -3.14536800 -1.84710000 -<br>0.29285900<br>O -1.89911700 -0.63195000<br>1.31236700<br>H -1.08564200 -0.03203300<br>1.40780000<br>P 1.07840600 1.10240800<br>0.23414000<br>O 0.17638700 0.91709500<br>1.45320900<br>H 2.02661500 2.13291400<br>0.35746700<br>O 0.39567300 1.43062700 -<br>1.18211500<br>H -0.40976400 0.83523400 -<br>1.32379300 |

|                                                                                                                                                                                                                                                                                                                                                                                                                                                                                                                                                       |                                                                                                                                                                                                                                                                                                                                                                                                                                                                                                                                                    |                                                                                                                                                                                                                                                                                                                                                                                                                                                                                                                                                      |
|-------------------------------------------------------------------------------------------------------------------------------------------------------------------------------------------------------------------------------------------------------------------------------------------------------------------------------------------------------------------------------------------------------------------------------------------------------------------------------------------------------------------------------------------------------|----------------------------------------------------------------------------------------------------------------------------------------------------------------------------------------------------------------------------------------------------------------------------------------------------------------------------------------------------------------------------------------------------------------------------------------------------------------------------------------------------------------------------------------------------|------------------------------------------------------------------------------------------------------------------------------------------------------------------------------------------------------------------------------------------------------------------------------------------------------------------------------------------------------------------------------------------------------------------------------------------------------------------------------------------------------------------------------------------------------|
| F 2.97502100 0.10482300<br>0.90030000<br>F -2.97733400 -0.09968900 -<br>0.89825300                                                                                                                                                                                                                                                                                                                                                                                                                                                                    | F -3.30669900 0.23274100<br>0.59882900<br>Cl 2.71827300 -0.27580800 -<br>0.97460300                                                                                                                                                                                                                                                                                                                                                                                                                                                                | F -3.81901900 0.35112400 -<br>0.03421500<br>Br 2.35101900 -0.68386600 -<br>0.08790400                                                                                                                                                                                                                                                                                                                                                                                                                                                                |
| <b>HF-2F</b><br>P 2.33797400 -0.06846000 -<br>0.30399300<br>O 1.41106300 -1.25872200 -<br>0.48276300<br>H 3.43008600 -0.02756000 -<br>1.17995800<br>O 1.71908000 1.40196100 -<br>0.37076200<br>H 0.72980600 1.40480300 -<br>0.19123500<br>P -1.74442000 0.06577400<br>0.05257700<br>O -0.85868400 1.28302000<br>0.08133200<br>O -1.12511200 -1.37522000 -<br>0.12995800<br>H -0.11553000 -1.34458500 -<br>0.26418700<br>F -2.89598400 0.14766300 -<br>1.04457100<br>F -2.67379900 -0.06973600<br>1.33734200<br>F 3.11217800 -0.12244800<br>1.10987600 | <b>HF-2Cl</b><br>P -2.75951300 0.25615000<br>0.07397600<br>O -1.83629900 0.34019900<br>1.27787700<br>H -3.80420800 1.18938000<br>0.06170700<br>O -2.12747000 0.35321000 -<br>1.38873300<br>H -1.15144700 0.09701400 -<br>1.39990300<br>P 1.26063400 -0.13555300 -<br>0.05936600<br>O 0.39235500 -0.31949400 -<br>1.29165200<br>O 0.62559600 -0.42634800<br>1.37746500<br>H -0.35327200 -0.14375400<br>1.38635700<br>Cl 2.02643100 1.75551400<br>0.02871300<br>Cl 2.90471100 -1.31317600 -<br>0.06681800<br>F -3.60786300 -1.11687600<br>0.06453400 | <b>HF-2Br</b><br>P -3.38037300 0.05266700<br>0.06460400<br>O -2.46689300 0.16951500<br>1.27332400<br>H -4.43624400 0.97274800<br>0.02881200<br>O -2.74158700 0.13186300 -<br>1.39617800<br>H -1.76329900 -0.12075800 -<br>1.40113700<br>P 0.62213900 -0.22739100 -<br>0.05026800<br>O -0.22165300 -0.52709900 -<br>1.28172000<br>O 0.00876000 -0.55800500<br>1.39280200<br>H -0.97584000 -0.29533800<br>1.40608000<br>Br 1.19851000 1.90484400<br>0.00313000<br>Br 2.51093600 -1.32454100 -<br>0.02691300<br>F -4.21230400 -1.33073100<br>0.07531000 |

|                                                                                                                                                                                                                                                                                                                                                                                                                                                                                                                                                     |                                                                                                                                                                                                                                                                                                                                                                                                                                                                                                                                                       |                                                                                                                                                                                                                                                                                                                                                                                                                                                                                                                                                     |
|-----------------------------------------------------------------------------------------------------------------------------------------------------------------------------------------------------------------------------------------------------------------------------------------------------------------------------------------------------------------------------------------------------------------------------------------------------------------------------------------------------------------------------------------------------|-------------------------------------------------------------------------------------------------------------------------------------------------------------------------------------------------------------------------------------------------------------------------------------------------------------------------------------------------------------------------------------------------------------------------------------------------------------------------------------------------------------------------------------------------------|-----------------------------------------------------------------------------------------------------------------------------------------------------------------------------------------------------------------------------------------------------------------------------------------------------------------------------------------------------------------------------------------------------------------------------------------------------------------------------------------------------------------------------------------------------|
| <b>HF-ClF</b><br>P -2.55700400 -0.40516300 -<br>0.14129800<br>O -1.60454000 -0.27199400 -<br>1.31768200<br>H -3.52890700 -1.40470300 -<br>0.27767100<br>O -1.94550700 -0.62984800<br>1.31620900<br>H -0.97168700 -0.37735900<br>1.36233200<br>P 1.45836700 0.33719000<br>0.13493200<br>O 0.58833000 0.01165300<br>1.32759700<br>O 0.78224900 0.67821100 -<br>1.26083200<br>H -0.16931900 0.31671200 -<br>1.30887900<br>F -3.50736400 0.88889800<br>0.01558100<br>F 2.39196900 1.61274000<br>0.37096000<br>Cl 2.86022200 -1.07846900 -<br>0.21655800 | <b>HF-BrF</b><br>P -2.91572500 -0.55818000 -<br>0.07731700<br>O -1.96114100 -0.48437100 -<br>1.25727500<br>H -3.73950100 -1.69086800 -<br>0.05247700<br>O -2.31677800 -0.46578900<br>1.39974600<br>H -1.39869000 -0.05116200<br>1.41289500<br>P 0.93991600 0.72645700<br>0.08889600<br>O 0.07324200 0.59082900<br>1.32242500<br>O 0.25370200 0.82432900 -<br>1.34286400<br>H -0.63192200 0.32159200 -<br>1.35145500<br>F -4.03529300 0.60214200 -<br>0.13468800<br>Br 2.47964500 -0.81972600 -<br>0.02361700<br>F 1.83834600 2.04971300<br>0.09776600 | <b>HF-BrCl</b><br>P -3.24138800 0.06477400<br>0.06633000<br>O -2.34582100 0.26978600<br>1.27677100<br>H -4.39251200 0.86274400<br>0.03860400<br>O -2.61393900 0.22837300 -<br>1.39214500<br>H -1.61375400 0.08729100 -<br>1.39549200<br>P 0.79659700 0.17322000 -<br>0.04683300<br>O -0.03751900 -0.14594200 -<br>1.27769200<br>O 0.19309200 -0.16856500<br>1.39452700<br>H -0.81495400 -0.01391600<br>1.39350500<br>F -3.91532700 -1.40199700<br>0.06287800<br>Cl 1.29152300 2.15822100<br>0.00695600<br>Br 2.72024700 -0.85848600 -<br>0.02928400 |
| <b>HF-HMe</b><br>P -1.87021900 -0.04948900<br>0.42711000<br>O -0.87475800 -1.18628400<br>0.60148200                                                                                                                                                                                                                                                                                                                                                                                                                                                 | <b>HF-2Me</b><br>P -2.23135400 -0.11618100<br>0.27511800<br>O -1.31223400 -1.32327300<br>0.15972200                                                                                                                                                                                                                                                                                                                                                                                                                                                   | <b>HF-MeF</b><br>P -2.34082600 -0.06366300<br>0.31974100<br>O -1.45758500 -1.28847100<br>0.48119200                                                                                                                                                                                                                                                                                                                                                                                                                                                 |



|                                           |                                          |                                           |
|-------------------------------------------|------------------------------------------|-------------------------------------------|
| O -1.31594800 1.42967900<br>0.24797000    | H -3.30114700 -0.27328300<br>1.16943600  | H -3.45392400 -0.01267800<br>1.17056800   |
| H -0.33962900 1.43923800 -<br>0.10173800  | O -1.60051300 1.29429000<br>0.63584000   | O -1.68440500 1.38345300<br>0.43245300    |
| P 1.94453500 0.12179700 -<br>0.40286900   | H -0.58265100 1.35073200<br>0.38214500   | H -0.67502600 1.36926100<br>0.28843000    |
| O 1.07253100 1.38050400 -<br>0.59273700   | P 1.67177400 0.09038300 -<br>0.06071700  | P 1.73834300 0.06794700 -<br>0.04110800   |
| H 3.11854700 0.17509000 -<br>1.18473800   | O 0.82505900 1.38438200<br>0.01929100    | O 0.86237800 1.30424100<br>0.11839500     |
| O 1.32239400 -1.29335200 -<br>0.91972300  | O 1.07612600 -1.09133300 -<br>1.01799800 | O 1.15021200 -1.32892100<br>0.47759500    |
| H 0.45983700 -1.43978400 -<br>0.44266800  | H 0.15212700 -1.30518600 -<br>0.71168000 | H 0.14158600 -1.34689500<br>0.46772200    |
| C 2.45681100 -0.12652700<br>1.31527800    | C 1.90758300 -0.65735200<br>1.57563700   | F -3.09554700 -0.06193200 -<br>1.10988800 |
| H 3.15273900 -0.97609300<br>1.37612900    | H 2.56086600 -1.53893600<br>1.49993300   | C 3.38603200 0.17934100<br>0.65372200     |
| H 2.93383900 0.79019400<br>1.69112400     | H 2.34242700 0.08581700<br>2.26008500    | H 3.90377000 1.03516800<br>0.19957400     |
| H 1.55537800 -0.34551000<br>1.90758400    | H 0.91964700 -0.96704200<br>1.94913100   | H 3.29715900 0.32855700<br>1.73849800     |
| F -2.83680000 -0.29616300 -<br>0.84817500 | C 3.28603900 0.39314600 -<br>0.80892700  | H 3.92954300 -0.75177700<br>0.44310800    |
| H -2.83886900 0.05248700<br>1.43665000    | H 3.12564400 0.80269700 -<br>1.81647700  | F 2.05256300 -0.19632900 -<br>1.61086900  |
|                                           | H 3.83435800 1.12618400 -<br>0.19969000  |                                           |
|                                           | H 3.85161000 -0.54736200 -<br>0.87530300 |                                           |
|                                           | F -3.06426900 0.12511700 -<br>1.09429800 |                                           |

|                                           |                                           |                                           |
|-------------------------------------------|-------------------------------------------|-------------------------------------------|
| <b>HF-MeCl</b>                            | <b>HF-MeBr</b>                            | <b>HCl-HCl</b>                            |
| P 2.44959000 -0.28068300<br>0.11252300    | P -2.69532500 0.20375600<br>0.10006300    | P 1.80065500 0.74687200 -<br>0.34522900   |
| O 1.58033200 -0.38866100<br>1.35316400    | O -1.87503700 0.51721300<br>1.33913500    | O 0.89766800 0.27100300 -<br>1.47981500   |
| H 3.67634400 -0.95577400<br>0.18360100    | H -4.02171300 0.65674100<br>0.13464800    | H 2.68178600 1.78441100 -<br>0.69128500   |
| O 1.84406100 -0.69601800 -<br>1.30104000  | O -2.15481400 0.65515700 -<br>1.32903100  | O 1.11900800 1.29836600<br>0.99743100     |
| H 0.82296900 -0.72618500 -<br>1.30514700  | H -1.15504900 0.86537100 -<br>1.33225400  | H 0.32086100 0.72825500<br>1.25581400     |
| P -1.54774100 -0.33413800 -<br>0.06157200 | P 1.21073100 0.83420400 -<br>0.06654600   | P -1.80064900 -0.74687300<br>0.34531000   |
| O -0.72109800 -0.81763500 -<br>1.25434300 | O 0.35247500 1.21974800 -<br>1.27482200   | O -0.89789900 -0.27088300<br>1.48002000   |
| O -1.01212900 -0.71303000<br>1.40787100   | O 0.64415400 1.21563400<br>1.39292700     | H -2.68183800 -1.78439000<br>0.69129400   |
| H -0.01171200 -0.59483500<br>1.45887900   | H -0.33038200 0.96462700<br>1.45703700    | O -1.11878000 -1.29836300 -<br>0.99723200 |
| F 2.98693300 1.22893500 -<br>0.10315600   | F -2.95843900 -1.38452900 -<br>0.04958300 | H -0.32064200 -0.72809600 -<br>1.25557200 |
| C -3.26537600 -0.86202600 -<br>0.05598400 | Br 1.47907800 -1.38155400 -<br>0.01910300 | Cl -3.09813800 0.73588800 -<br>0.23706800 |
| H -3.74002600 -0.51624500 -<br>0.98433600 | C 2.88178100 1.49962000 -<br>0.07344700   | Cl 3.09812500 -0.73595600<br>0.23679200   |
| H -3.28160900 -1.96077200 -<br>0.00767500 | H 3.38303800 1.17201700 -<br>0.99440300   |                                           |
| H -3.77064400 -0.43170200<br>0.81928300   | H 2.80866700 2.59727500 -<br>0.04928300   |                                           |
| Cl -1.64956100 1.73190100 -               | H 3.41766400 1.13000300                   |                                           |

|                                                                                                                                                                                                                                                                                                                                                                                                                                                                                                                                                     |                                                                                                                                                                                                                                                                                                                                                                                                                                                                                                                                                        |                                                                                                                                                                                                                                                                                                                                                                                                                                                                                                                                                   |
|-----------------------------------------------------------------------------------------------------------------------------------------------------------------------------------------------------------------------------------------------------------------------------------------------------------------------------------------------------------------------------------------------------------------------------------------------------------------------------------------------------------------------------------------------------|--------------------------------------------------------------------------------------------------------------------------------------------------------------------------------------------------------------------------------------------------------------------------------------------------------------------------------------------------------------------------------------------------------------------------------------------------------------------------------------------------------------------------------------------------------|---------------------------------------------------------------------------------------------------------------------------------------------------------------------------------------------------------------------------------------------------------------------------------------------------------------------------------------------------------------------------------------------------------------------------------------------------------------------------------------------------------------------------------------------------|
| 0.07704600                                                                                                                                                                                                                                                                                                                                                                                                                                                                                                                                          | 0.81134100                                                                                                                                                                                                                                                                                                                                                                                                                                                                                                                                             |                                                                                                                                                                                                                                                                                                                                                                                                                                                                                                                                                   |
| <b>HCl-HBr</b><br>P -1.21036900 1.09740600<br>0.23638700<br>O -0.31870700 0.80240700<br>1.44197700<br>H -2.02729200 2.23288500<br>0.37690700<br>O -0.51555600 1.35023900 -<br>1.18955800<br>H 0.20374000 0.65544600 -<br>1.35573400<br>P 2.18013700 -0.85497500 -<br>0.19442500<br>O 1.28735200 -0.51666600 -<br>1.38509600<br>H 2.93036200 -2.03357700 -<br>0.33860600<br>O 1.50015100 -1.04669200<br>1.24524300<br>H 0.77954100 -0.34924800<br>1.40023600<br>Br -2.68942400 -0.52424400 -<br>0.07016000<br>Cl 3.65123900 0.55836700<br>0.04957900 | <b>HCl-2F</b><br>P 2.01738200 -0.66483900<br>0.15453800<br>O 1.10823500 -0.74942900<br>1.37776400<br>H 3.19254700 -1.42743900<br>0.24487900<br>O 1.42090700 -1.10874800 -<br>1.26900800<br>H 0.47893200 -0.77600200 -<br>1.36912400<br>P -1.91603700 0.09457700 -<br>0.07909100<br>O -1.02769400 -0.14339500 -<br>1.27132000<br>O -1.33877100 0.00475500<br>1.38761100<br>H -0.35884600 -0.28471800<br>1.40046000<br>F -3.21066200 -0.83379500 -<br>0.05797600<br>F -2.65661800 1.50320200 -<br>0.11819700<br>Cl 2.74537000 1.23482100 -<br>0.09545500 | <b>HCl-2Cl</b><br>P -2.42691300 0.70823400<br>0.19224800<br>O -1.55947000 0.77804600<br>1.44595600<br>H -3.68379200 1.32318500<br>0.31077500<br>O -1.85858000 1.33893600 -<br>1.17015900<br>H -0.89471600 1.07694800 -<br>1.30114400<br>P 1.44301500 0.12490600 -<br>0.06327800<br>O 0.63631500 0.54133400 -<br>1.28055000<br>O 1.01761500 0.68013100<br>1.37259200<br>H 0.00055500 0.72048300<br>1.44606200<br>Cl 3.39306300 0.65241500 -<br>0.17883100<br>Cl 1.50432500 -1.90889600<br>0.10521600<br>Cl -2.92977800 -1.23324200 -<br>0.24008900 |
| <b>HCl-2Br</b><br>P 3.09361000 0.53893100 -<br>0.07524600                                                                                                                                                                                                                                                                                                                                                                                                                                                                                           | <b>HCl-ClF</b><br>P 1.62699000 0.38931100 -<br>0.10503100                                                                                                                                                                                                                                                                                                                                                                                                                                                                                              | <b>HCl-BrF</b><br>P 1.10067800 0.74284300 -<br>0.10996600                                                                                                                                                                                                                                                                                                                                                                                                                                                                                         |

|                                                                                                                                                                                                                                                                                                                                                                                                                                                                                          |                                                                                                                                                                                                                                                                                                                                                                                                                                                                                         |                                                                                                                                                                                                                                                                                                                                                                                                                                                                                          |
|------------------------------------------------------------------------------------------------------------------------------------------------------------------------------------------------------------------------------------------------------------------------------------------------------------------------------------------------------------------------------------------------------------------------------------------------------------------------------------------|-----------------------------------------------------------------------------------------------------------------------------------------------------------------------------------------------------------------------------------------------------------------------------------------------------------------------------------------------------------------------------------------------------------------------------------------------------------------------------------------|------------------------------------------------------------------------------------------------------------------------------------------------------------------------------------------------------------------------------------------------------------------------------------------------------------------------------------------------------------------------------------------------------------------------------------------------------------------------------------------|
| O 2.19471200 0.69415800 -<br>1.29972400<br>H 4.21951400 1.37796000 -<br>0.06625700<br>O 2.45826500 0.79451700<br>1.37681200<br>H 1.54002800 0.37945200<br>1.43639500<br>P -0.77854300 -0.18235900<br>0.04836000<br>O 0.10526400 -0.34454200<br>1.27795400<br>O -0.12908900 -0.42299800 -<br>1.39642900<br>H 0.80074800 -0.00020300 -<br>1.42355700<br>Cl 3.94074900 -1.32767200 -<br>0.01175400<br>Br -1.67536800 1.83539900 -<br>0.00990200<br>Br -2.47641100 -1.55838300<br>0.03812000 | O 0.75612000 0.10791500 -<br>1.30840800<br>O 0.96355200 0.54223600<br>1.32938100<br>H 0.06928500 0.05102000<br>1.37822200<br>P -2.19999000 -0.76011100<br>0.15670200<br>O -1.26893100 -0.72695000<br>1.36628200<br>O -1.56918700 -1.11153600 -<br>1.27747300<br>H -0.67124500 -0.67017400 -<br>1.38098500<br>Cl -3.18450600 1.02348300 -<br>0.07042600<br>F 2.44444700 1.75634700 -<br>0.23360300<br>H -3.25968000 -1.67545900<br>0.25824800<br>Cl 3.14945800 -0.93194400<br>0.08181600 | O 0.22635800 0.51205400 -<br>1.32415300<br>O 0.42964700 0.85881600<br>1.32763000<br>H -0.38904500 0.25195100<br>1.38706900<br>P -2.52699500 -0.85515200<br>0.13882400<br>O -1.60099000 -0.72115100<br>1.34546000<br>O -1.86521800 -1.07451100 -<br>1.30798900<br>H -1.05126700 -0.49170400 -<br>1.41202600<br>Br 2.72576200 -0.71233400<br>0.03586400<br>Cl -3.75993600 0.77308100 -<br>0.03371200<br>F 1.91954300 2.11433700 -<br>0.18181600<br>H -3.44197500 -1.91699700<br>0.21871200 |
| <b>HCl-BrCl</b><br>P -2.87851900 -0.79743200<br>0.18894100<br>O -2.03083700 -0.78435600<br>1.45804600<br>O -2.24591000 -1.41683400 -<br>1.14998000<br>H -1.29857700 -1.09451700 -                                                                                                                                                                                                                                                                                                        | <b>HCl-HMe</b><br>P -1.50210900 0.63228400<br>0.46947200<br>O -0.53777900 0.00899100<br>1.47651600<br>H -2.45422000 1.50681100<br>1.02215700<br>O -0.88951700 1.47706200 -                                                                                                                                                                                                                                                                                                              | <b>HCl-2Me</b><br>P 1.89464000 0.68574000 -<br>0.06998200<br>O 0.99076100 0.76790000 -<br>1.29872100<br>H 2.97116300 1.59057200 -<br>0.06937500<br>O 1.23793100 0.88334900                                                                                                                                                                                                                                                                                                               |

|                                                                                                                                                                                                                                                                                                                                                                       |                                                                                                                                                                                                                                                                                                                                                                                                                                                                                                 |                                                                                                                                                                                                                                                                                                                                                                                                                                                                                                                                                                                                                                              |
|-----------------------------------------------------------------------------------------------------------------------------------------------------------------------------------------------------------------------------------------------------------------------------------------------------------------------------------------------------------------------|-------------------------------------------------------------------------------------------------------------------------------------------------------------------------------------------------------------------------------------------------------------------------------------------------------------------------------------------------------------------------------------------------------------------------------------------------------------------------------------------------|----------------------------------------------------------------------------------------------------------------------------------------------------------------------------------------------------------------------------------------------------------------------------------------------------------------------------------------------------------------------------------------------------------------------------------------------------------------------------------------------------------------------------------------------------------------------------------------------------------------------------------------------|
| 1.27071700<br>P 0.95062000 0.03606900 -<br>0.02233900<br>O 0.19065400 -0.46000800 -<br>1.24230700<br>O 0.53433000 -0.51532700<br>1.42005700<br>H -0.47995700 -0.62028900<br>1.47726400<br>Br 3.09016100 -0.39725900 -<br>0.10482600<br>Cl 0.85588400 2.07562200<br>0.10359700<br>Cl -3.50000900 1.09747900 -<br>0.29321600<br>H -4.09439200 -1.49119500<br>0.30034200 | 0.74071300<br>H -0.01992900 1.03129800 -<br>1.08907500<br>P 2.10812500 -0.38437700 -<br>0.40559800<br>O 1.23684100 0.30558500 -<br>1.47684900<br>H 3.16174500 -1.12349800 -<br>0.98500400<br>O 1.39994900 -1.55242200<br>0.48440300<br>H 0.62052200 -1.14844400<br>0.95673100<br>C 2.84610400 0.78735900<br>0.75986300<br>H 3.52402100 0.25552100<br>1.44340000<br>H 3.39028800 1.56402300<br>0.20325500<br>H 2.02840500 1.24752200<br>1.33544000<br>Cl -2.71139100 -0.80527700 -<br>0.37359000 | 1.36921200<br>H 0.29412800 0.42054200<br>1.40967900<br>P -1.87647800 -0.15321500<br>0.07801500<br>O -1.00531700 -0.23411500<br>1.35658800<br>O -1.20474400 -0.76167400 -<br>1.28099400<br>H -0.34175400 -0.28940000 -<br>1.44394600<br>C -2.33508300 1.55886100 -<br>0.30928300<br>H -2.99541900 1.58625800 -<br>1.18839600<br>H -2.83318900 2.01169300<br>0.56059500<br>H -1.40907300 2.11114600 -<br>0.53093600<br>C -3.37259100 -1.15143500<br>0.22685700<br>H -3.07263700 -2.19284500<br>0.41178400<br>H -3.96660200 -0.78591000<br>1.07698900<br>H -3.95797000 -1.09230800 -<br>0.70192400<br>Cl 2.89034900 -1.11975500 -<br>0.01877000 |
| <b>HCl-MeF</b>                                                                                                                                                                                                                                                                                                                                                        | <b>HCl-MeCl</b>                                                                                                                                                                                                                                                                                                                                                                                                                                                                                 | <b>HCl-MeBr</b>                                                                                                                                                                                                                                                                                                                                                                                                                                                                                                                                                                                                                              |

|                                           |                                           |                                           |
|-------------------------------------------|-------------------------------------------|-------------------------------------------|
| P 2.02105100 -0.69075800<br>0.09497800    | P 2.14842800 -0.68917400<br>0.14605100    | P 2.46221600 -0.63030600<br>0.17422600    |
| O 1.16227800 -0.86933400<br>1.34281600    | O 1.30183400 -0.87905800<br>1.40061300    | O 1.62405900 -0.86654900<br>1.42663200    |
| H 3.20965800 -1.43986100<br>0.08286700    | H 3.42076100 -1.28336900<br>0.19623000    | H 3.79407300 -1.06958300<br>0.26295900    |
| O 1.37647700 -1.02003500 -<br>1.33353200  | O 1.57170800 -1.19889000 -<br>1.25788600  | O 1.97068100 -1.26013500 -<br>1.21319200  |
| H 0.40955200 -0.70157400 -<br>1.37525800  | H 0.56820300 -1.02752000 -<br>1.33015200  | H 0.95362100 -1.23338300 -<br>1.29873700  |
| P -1.91591100 0.08593100 -<br>0.07348600  | P -1.74792600 -0.27421500 -<br>0.09492000 | P -1.44756800 -0.79312900 -<br>0.10463500 |
| O -1.06850000 -0.21213700 -<br>1.30417500 | O -0.96987800 -0.77464900 -<br>1.31301500 | O -0.60412200 -1.21098000 -<br>1.31255100 |
| O -1.42069500 -0.49978600<br>1.33261600   | O -1.31178700 -0.83960300<br>1.34689900   | O -0.95515800 -1.28287300<br>1.34898000   |
| H -0.41960400 -0.63000800<br>1.36882100   | H -0.30583300 -0.86309700<br>1.43448400   | H 0.03831200 -1.13405900<br>1.45288700    |
| C -3.64874900 -0.35587200 -<br>0.18689900 | C -3.52336000 -0.54612200 -<br>0.15568000 | C -3.17411700 -1.29437400 -<br>0.16967400 |
| H -4.08870000 0.16007600 -<br>1.05120900  | H -3.91958100 -0.06474700 -<br>1.06011900 | H -3.62162800 -0.88389700 -<br>1.08509800 |
| H -3.72239100 -1.44349700 -<br>0.32345000 | H -3.69802100 -1.63137600 -<br>0.19591100 | H -3.20648600 -2.39407000 -<br>0.18984100 |
| H -4.15901100 -0.05531900<br>0.73829900   | H -3.98409800 -0.11612200<br>0.74395500   | H -3.69164800 -0.91014900<br>0.71980000   |
| F -1.99222200 1.68825100<br>0.17237800    | Cl -1.55261600 1.78017600<br>0.05600800   | Cl 2.71859600 1.38197800 -<br>0.16589300  |
| Cl 2.74231900 1.23140600 -<br>0.02907400  | Cl 2.63003800 1.29343600 -<br>0.11684700  | Br -1.51260200 1.43467400<br>0.02666900   |

|                                                                                                                                                                                                                                                                                                                                                                                                                                                                                                                                                                                                                         |                                                                                                                                                                                                                                                                                                                                                                                                                                                                                                                                                                                                                     |                                                                                                                                                                                                                                                                                                                                                                                                                                                                                                                                                                                                                      |
|-------------------------------------------------------------------------------------------------------------------------------------------------------------------------------------------------------------------------------------------------------------------------------------------------------------------------------------------------------------------------------------------------------------------------------------------------------------------------------------------------------------------------------------------------------------------------------------------------------------------------|---------------------------------------------------------------------------------------------------------------------------------------------------------------------------------------------------------------------------------------------------------------------------------------------------------------------------------------------------------------------------------------------------------------------------------------------------------------------------------------------------------------------------------------------------------------------------------------------------------------------|----------------------------------------------------------------------------------------------------------------------------------------------------------------------------------------------------------------------------------------------------------------------------------------------------------------------------------------------------------------------------------------------------------------------------------------------------------------------------------------------------------------------------------------------------------------------------------------------------------------------|
| <p><b>HBr-HBr</b></p> <p>P 1.60859100 -1.09747100<br/>0.19506000</p> <p>O 0.72757800 -0.77072300<br/>1.40031800</p> <p>H 2.32542400 -2.30196700<br/>0.30387800</p> <p>O 0.91623600 -1.24120800 -<br/>1.24719400</p> <p>H 0.25927900 -0.48318300 -<br/>1.39837900</p> <p>P -1.60856200 1.09737700 -<br/>0.19551200</p> <p>O -0.72811300 0.77009600 -<br/>1.40104100</p> <p>H -2.32542500 2.30183600 -<br/>0.30447400</p> <p>O -0.91574000 1.24167900<br/>1.24640300</p> <p>H -0.25932800 0.48342900<br/>1.39813700</p> <p>Br -3.22234800 -0.40375700<br/>0.03642400</p> <p>Br 3.22234600 0.40383000 -<br/>0.03586000</p> | <p><b>HBr-2F</b></p> <p>P -1.46301100 1.13188600<br/>0.12569900</p> <p>O -0.54055600 1.22531700<br/>1.34102700</p> <p>H -2.57294100 1.99246400<br/>0.17057100</p> <p>O -0.84632800 1.44893400 -<br/>1.32630500</p> <p>H 0.03199700 0.97525000 -<br/>1.42780900</p> <p>P 2.28692900 -0.18022100 -<br/>0.07510900</p> <p>O 1.42026500 0.10383500 -<br/>1.27306800</p> <p>O 1.76722200 0.11646000<br/>1.38591000</p> <p>H 0.84058600 0.54891100<br/>1.38686000</p> <p>F 3.71384100 0.52552100 -<br/>0.14175700</p> <p>F 2.79143900 -1.68898700 -<br/>0.00922800</p> <p>Br -2.38887900 -0.87076500 -<br/>0.01571700</p> | <p><b>HBr-2Cl</b></p> <p>P 1.90768600 1.18258100 -<br/>0.21046700</p> <p>O 1.02267100 1.26552500 -<br/>1.45358100</p> <p>H 3.11279600 1.90028600 -<br/>0.30185900</p> <p>O 1.31213700 1.69698000<br/>1.19223800</p> <p>H 0.40064700 1.29644800<br/>1.33812100</p> <p>P -1.82477800 0.09117700<br/>0.06654300</p> <p>O -1.02905500 0.51312300<br/>1.28894700</p> <p>O -1.50848800 0.78124700 -<br/>1.33847700</p> <p>H -0.50859400 0.97082500 -<br/>1.42469900</p> <p>Cl -3.81698700 0.39066400<br/>0.26589900</p> <p>Cl -1.67334100 -1.92179400 -<br/>0.23833300</p> <p>Br 2.59168500 -0.89427800<br/>0.13044700</p> |
| <p><b>HBr-2Br</b></p> <p>P -2.55562000 1.07065800<br/>0.09050800</p> <p>O -1.65077700 1.14576500<br/>1.32092700</p>                                                                                                                                                                                                                                                                                                                                                                                                                                                                                                     | <p><b>HBr-ClF</b></p> <p>P 1.62455400 -1.15334200<br/>0.15311300</p> <p>O 0.69536600 -1.10815700<br/>1.36647600</p>                                                                                                                                                                                                                                                                                                                                                                                                                                                                                                 | <p><b>HBr-BrF</b></p> <p>P 1.95185600 -1.16502200<br/>0.15757500</p> <p>O 1.03759300 -1.00139500<br/>1.37206000</p>                                                                                                                                                                                                                                                                                                                                                                                                                                                                                                  |

|                                                                                                                                                                                                                                                                                                                                                                                                                                                   |                                                                                                                                                                                                                                                                                                                                                                                                                                                 |                                                                                                                                                                                                                                                                                                                                                                                                                                                |
|---------------------------------------------------------------------------------------------------------------------------------------------------------------------------------------------------------------------------------------------------------------------------------------------------------------------------------------------------------------------------------------------------------------------------------------------------|-------------------------------------------------------------------------------------------------------------------------------------------------------------------------------------------------------------------------------------------------------------------------------------------------------------------------------------------------------------------------------------------------------------------------------------------------|------------------------------------------------------------------------------------------------------------------------------------------------------------------------------------------------------------------------------------------------------------------------------------------------------------------------------------------------------------------------------------------------------------------------------------------------|
| H -3.61274000 1.99689900<br>0.08914800<br>O -1.89870000 1.30581500 -<br>1.35865400<br>H -1.05109300 0.76509600 -<br>1.43881600<br>P 1.16059700 -0.15074800 -<br>0.04326900<br>O 0.25364500 -0.18314600 -<br>1.26623100<br>O 0.49373200 -0.28445900<br>1.40729000<br>H -0.36633600 0.26817500<br>1.43826500<br>Br 2.35223300 1.70868400 -<br>0.00179100<br>Br 2.63177800 -1.76745500 -<br>0.03711800<br>Br -3.60194500 -0.87553200 -<br>0.00748600 | H 2.62823400 -2.13439300<br>0.22449300<br>O 0.97616400 -1.43515000 -<br>1.29187600<br>H 0.14467600 -0.88161200 -<br>1.40226500<br>P -2.01571100 0.42346600 -<br>0.08444600<br>O -1.16132500 0.09660100 -<br>1.28807300<br>O -1.37056700 0.41709600<br>1.36634300<br>H -0.54223500 -0.18079800<br>1.40222500<br>Br 2.77778000 0.72353500 -<br>0.03590800<br>Cl -3.69616400 -0.70200400<br>0.00877300<br>F -2.65199100 1.88802100 -<br>0.15219600 | H 2.82432700 -2.26433500<br>0.23014300<br>O 1.27251500 -1.36909300 -<br>1.28672800<br>H 0.52573600 -0.70676100 -<br>1.40680400<br>P -1.49735900 0.73150300 -<br>0.08847400<br>O -0.62879200 0.44914400 -<br>1.29587400<br>O -0.84204400 0.75680200<br>1.36087500<br>H -0.08320900 0.07615900<br>1.41998300<br>Br 3.33083000 0.55157600 -<br>0.03804700<br>F -2.18919900 2.17232400 -<br>0.14027600<br>Br -3.24785000 -0.57548600<br>0.00319000 |
| <b>HBr-BrCl</b><br>P 2.09700700 -1.15095600<br>0.10452000<br>O 1.18566100 -1.08127100<br>1.33042200<br>H 3.01163900 -2.21798300<br>0.11998900<br>O 1.41855300 -1.30906100 -<br>1.34529200<br>H 0.65286500 -0.65962200 -                                                                                                                                                                                                                           | <b>HBr-HMe</b><br>P 0.90291100 1.06910200 -<br>0.31387800<br>O -0.03781200 0.67932800 -<br>1.45475100<br>O 0.25897600 1.46098500<br>1.09779800<br>H -0.51323100 0.80683500<br>1.32643900<br>P -2.47590500 -0.62830100                                                                                                                                                                                                                           | <b>HBr-2Me</b><br>P 1.30967000 1.09924100 -<br>0.07110400<br>O 0.41027400 1.09383600 -<br>1.30821600<br>H 2.29173600 2.10751500 -<br>0.06288700<br>O 0.62644900 1.24001400<br>1.36489000<br>H -0.23337900 0.63582000                                                                                                                                                                                                                           |



|                                                                                                                                                                                                                                                                                                                             |                                                                                                                                                                                                                                                                                                                                                                                                                                                                |                                                                                                                                                                                                                                                                                                                                                                                                                                                                                                                                                                                                     |
|-----------------------------------------------------------------------------------------------------------------------------------------------------------------------------------------------------------------------------------------------------------------------------------------------------------------------------|----------------------------------------------------------------------------------------------------------------------------------------------------------------------------------------------------------------------------------------------------------------------------------------------------------------------------------------------------------------------------------------------------------------------------------------------------------------|-----------------------------------------------------------------------------------------------------------------------------------------------------------------------------------------------------------------------------------------------------------------------------------------------------------------------------------------------------------------------------------------------------------------------------------------------------------------------------------------------------------------------------------------------------------------------------------------------------|
| 1.43510800<br>P -1.41681900 0.56987700 -<br>0.05950800<br>O -0.51676100 0.45826500 -<br>1.28047100<br>O -0.74145600 0.63212600<br>1.38956500<br>H 0.03422900 -0.03203400<br>1.43189000<br>Br 3.40949400 0.62525300 -<br>0.01122900<br>Br -2.87192900 -1.08554200<br>0.00345700<br>Cl -2.55789900 2.24326300 -<br>0.07492400 | 0.29039200<br>O -1.62269900 -0.19265600<br>1.50103000<br>H -3.39519400 -1.64190800<br>0.63610500<br>O -1.69615000 -1.36220000 -<br>0.93916900<br>H -1.00803300 -0.73022300 -<br>1.28719400<br>C -3.41936100 0.73807000 -<br>0.42985900<br>H -4.07471200 0.35845700 -<br>1.22738100<br>H -4.01175000 1.22863700<br>0.35598400<br>H -2.69939700 1.45476200 -<br>0.85382900<br>H 1.74627900 2.16170400 -<br>0.58845300<br>Br 2.36710300 -0.55321000<br>0.08372900 | 1.41393900<br>P -2.28898300 -0.24816800<br>0.07795300<br>O -1.41072200 -0.22024400<br>1.35428400<br>O -1.54275500 -0.73798200 -<br>1.29014500<br>H -0.75972900 -0.14230100 -<br>1.45343700<br>C -2.98535800 1.38696600 -<br>0.28629400<br>H -3.64513900 1.33281800 -<br>1.16455900<br>H -3.53972800 1.75400900<br>0.58993200<br>H -2.14646700 2.06659900 -<br>0.50113200<br>C -3.62693100 -1.45118700<br>0.21676000<br>H -3.18036600 -2.44091300<br>0.38934600<br>H -4.26454600 -1.18398500<br>1.07185400<br>H -4.21724200 -1.46598500 -<br>0.71063500<br>Br 2.55406600 -0.74426700 -<br>0.00641300 |
| <b>HBr-MeF</b><br>P -1.47807400 1.15298100<br>0.08678400<br>O -0.60935700 1.31880800                                                                                                                                                                                                                                        | <b>HBr-MeCl</b><br>P -1.61874000 1.18502300<br>0.17151200<br>O -0.74070700 1.28704400                                                                                                                                                                                                                                                                                                                                                                          | <b>HBr-MeBr</b><br>P -1.97174100 1.18429200<br>0.23863100<br>O -1.08301100 1.29679800                                                                                                                                                                                                                                                                                                                                                                                                                                                                                                               |

|                                                                                                                                                                                                                                                                                                                                                                                                                                                                                                                                                                                           |                                                                                                                                                                                                                                                                                                                                                                                                                                                                                                                                                                                           |                                                                                                                                                                                                                                                                                                                                                                                                                                                                                                                                                                                         |
|-------------------------------------------------------------------------------------------------------------------------------------------------------------------------------------------------------------------------------------------------------------------------------------------------------------------------------------------------------------------------------------------------------------------------------------------------------------------------------------------------------------------------------------------------------------------------------------------|-------------------------------------------------------------------------------------------------------------------------------------------------------------------------------------------------------------------------------------------------------------------------------------------------------------------------------------------------------------------------------------------------------------------------------------------------------------------------------------------------------------------------------------------------------------------------------------------|-----------------------------------------------------------------------------------------------------------------------------------------------------------------------------------------------------------------------------------------------------------------------------------------------------------------------------------------------------------------------------------------------------------------------------------------------------------------------------------------------------------------------------------------------------------------------------------------|
| 1.33187300<br>H -2.62750800 1.96266400<br>0.05816500<br>O -0.82191600 1.42816300 -<br>1.35101700<br>H 0.09151700 0.98247700 -<br>1.40514500<br>P 2.26603900 -0.15640800 -<br>0.07299900<br>O 1.48318500 0.27189500 -<br>1.30781200<br>O 1.87515500 0.51183600<br>1.32945900<br>H 0.91114300 0.81242800<br>1.36454500<br>C 4.04865300 -0.01256100 -<br>0.18464900<br>H 4.39712900 -0.60215100 -<br>1.04356600<br>H 4.30385700 1.04614700 -<br>0.32958500<br>H 4.49972300 -0.38674500<br>0.74443800<br>F 2.07181300 -1.74730700<br>0.18290600<br>Br -2.33571700 -0.89165400 -<br>0.00439700 | 1.41710100<br>H -2.80303700 1.94210000<br>0.22210900<br>O -0.99815500 1.60376900 -<br>1.24648500<br>H -0.04836500 1.24513800 -<br>1.34440800<br>P 2.15678700 0.16678200 -<br>0.11742100<br>O 1.41317400 0.69492100 -<br>1.34530300<br>O 1.83645800 0.85987100<br>1.29878500<br>H 0.84609400 1.02846500<br>1.40645200<br>C 3.95003400 0.20850700 -<br>0.23084900<br>H 4.25742600 -0.36731800 -<br>1.11441000<br>H 4.25794500 1.25915100 -<br>0.33660200<br>H 4.37835700 -0.22729500<br>0.68191900<br>Br -2.39705900 -0.87887400 -<br>0.07263100<br>Cl 1.71480000 -1.83603700<br>0.15341100 | 1.47578900<br>H -3.22519000 1.81207200<br>0.35406900<br>O -1.42579900 1.75289200 -<br>1.15767100<br>H -0.44191100 1.51686300 -<br>1.28928100<br>P 1.89723500 0.68963800 -<br>0.14868900<br>O 1.07690200 1.16168700 -<br>1.35259300<br>O 1.52464200 1.30766300<br>1.29157800<br>H 0.52407100 1.31056800<br>1.43133600<br>C 3.67219200 0.94998200 -<br>0.28553100<br>H 4.02965000 0.44167000 -<br>1.19142000<br>H 3.85029200 2.03319400 -<br>0.36120100<br>H 4.16368200 0.54019900<br>0.60729100<br>Br -2.54698200 -0.92752200 -<br>0.12609500<br>Br 1.67389600 -1.51864100<br>0.09056400 |
| <b>2F-2F</b><br>P -2.05282000 -0.06464500<br>0.00038900                                                                                                                                                                                                                                                                                                                                                                                                                                                                                                                                   | <b>2F-2Cl</b><br>P -2.47793300 -0.05169300<br>0.06044400                                                                                                                                                                                                                                                                                                                                                                                                                                                                                                                                  | <b>2F-2Br</b><br>P -3.09873700 -0.24952600<br>0.05700500                                                                                                                                                                                                                                                                                                                                                                                                                                                                                                                                |

|                                                                                                                                                                                                                                                                                                                                                                                                                                                                                       |                                                                                                                                                                                                                                                                                                                                                                                                                                                                                               |                                                                                                                                                                                                                                                                                                                                                                                                                                                                                                |
|---------------------------------------------------------------------------------------------------------------------------------------------------------------------------------------------------------------------------------------------------------------------------------------------------------------------------------------------------------------------------------------------------------------------------------------------------------------------------------------|-----------------------------------------------------------------------------------------------------------------------------------------------------------------------------------------------------------------------------------------------------------------------------------------------------------------------------------------------------------------------------------------------------------------------------------------------------------------------------------------------|------------------------------------------------------------------------------------------------------------------------------------------------------------------------------------------------------------------------------------------------------------------------------------------------------------------------------------------------------------------------------------------------------------------------------------------------------------------------------------------------|
| O -1.14994200 -1.26963700<br>0.00558800<br>O -1.44002700 1.39321500 -<br>0.00586500<br>H -0.43070600 1.37348500 -<br>0.00180700<br>P 2.05283000 0.06464500<br>0.00011600<br>O 1.14991800 1.26960700<br>0.00524900<br>O 1.44000500 -1.39320700 -<br>0.00611800<br>H 0.43067400 -1.37342000 -<br>0.00180600<br>F 3.09400900 0.04897800<br>1.20127500<br>F 3.09382900 0.05772800 -<br>1.20123300<br>F -3.09402100 -0.04890200<br>1.20152700<br>F -3.09379100 -0.05779400 -<br>1.20099200 | O -1.57620800 0.08251300<br>1.25915000<br>O -1.87004700 -0.31118100 -<br>1.37506900<br>H -0.85681500 -0.36311000 -<br>1.35199000<br>P 1.56006700 -0.13086400 -<br>0.04921700<br>O 0.70153800 -0.45379800 -<br>1.26033900<br>O 0.97582300 -0.45086700<br>1.40640500<br>H -0.01550400 -0.26189700<br>1.42015000<br>Cl 2.09772200 1.83465900 -<br>0.02912000<br>F -3.44326000 1.19704200 -<br>0.13851500<br>Cl 3.32184800 -1.11593800 -<br>0.04293700<br>F -3.59465300 -1.17351100<br>0.22154000 | O -2.20814200 -0.16144600<br>1.26791000<br>O -2.47975100 -0.44385700 -<br>1.38404900<br>H -1.46807700 -0.53607900 -<br>1.35285100<br>P 0.90254000 -0.26798400 -<br>0.03448800<br>O 0.08032000 -0.69205100 -<br>1.24476700<br>O 0.35831000 -0.66004300<br>1.42526300<br>H -0.63615200 -0.49551200<br>1.45424200<br>F -4.06774300 1.00235400 -<br>0.10219000<br>F -4.21320300 -1.38077500<br>0.16638600<br>Br 2.90842400 -1.12140200 -<br>0.03153500<br>Br 1.19357000 1.91738000 -<br>0.01223000 |
| <b>2F-ClF</b><br>P -2.29075600 -0.08050400<br>0.06382100<br>O -1.37279300 -0.26357500<br>1.24389100<br>O -1.71812100 0.41875800 -<br>1.32294000<br>H -0.70641000 0.40112300 -                                                                                                                                                                                                                                                                                                         | <b>2F-BrF</b><br>P -2.71938000 -0.17351900<br>0.06460500<br>O -1.77862200 -0.27491300<br>1.23668600<br>O -2.22542500 0.44460500 -<br>1.30441900<br>H -1.21779600 0.54079000 -                                                                                                                                                                                                                                                                                                                 | <b>2F-BrCl</b><br>P -2.95686100 -0.16381600<br>0.05840200<br>O -2.07804400 0.04122900<br>1.26405900<br>O -2.32086000 -0.34293700 -<br>1.37706300<br>H -1.30606000 -0.31524700 -                                                                                                                                                                                                                                                                                                                |

|                                                                                                                                                                                                                                                                                                                                                                   |                                                                                                                                                                                                                                                                                                                                                                    |                                                                                                                                                                                                                                                                                                                                                                        |
|-------------------------------------------------------------------------------------------------------------------------------------------------------------------------------------------------------------------------------------------------------------------------------------------------------------------------------------------------------------------|--------------------------------------------------------------------------------------------------------------------------------------------------------------------------------------------------------------------------------------------------------------------------------------------------------------------------------------------------------------------|------------------------------------------------------------------------------------------------------------------------------------------------------------------------------------------------------------------------------------------------------------------------------------------------------------------------------------------------------------------------|
| 1.33402000<br>P 1.77020300 0.32789600 -<br>0.05958500<br>O 0.86591100 0.32105000 -<br>1.27193600<br>O 1.12571000 0.44068500<br>1.39055400<br>H 0.15337100 0.16844300<br>1.37654300<br>F -3.50895600 0.90339100<br>0.33451400<br>Cl 3.03696000 -1.24197000 -<br>0.02964100<br>F -3.12842200 -1.39023600 -<br>0.27526000<br>F 2.80708500 1.54214600 -<br>0.05022100 | 1.32570300<br>P 1.25003000 0.70916000 -<br>0.06196300<br>O 0.35344600 0.63222900 -<br>1.28006100<br>O 0.58528700 0.80578800<br>1.38336100<br>H -0.33398300 0.38857300<br>1.38082200<br>F -4.05483900 0.63256600<br>0.36819100<br>F -3.37950000 -1.57056000 -<br>0.31675100<br>F 2.19774500 1.99675000 -<br>0.05393300<br>Br 2.72125400 -0.89584200 -<br>0.01019500 | 1.34708900<br>P 1.07270400 0.13532800 -<br>0.03971300<br>O 0.25067000 -0.28664800 -<br>1.24829000<br>O 0.51578200 -0.22570900<br>1.41955000<br>H -0.49015300 -0.13864500<br>1.42686700<br>F -4.03813200 0.98760300 -<br>0.13153900<br>F -3.96062900 -1.39044900<br>0.20084800<br>Br 3.07166300 -0.73089600 -<br>0.02286000<br>Cl 1.38816700 2.15298300 -<br>0.03822600 |
| <b>2F-HMe</b><br>P -1.61109200 -0.08374500<br>0.00843800<br>O -0.64020500 -1.16989300 -<br>0.38296400<br>O -1.08701000 1.34720500<br>0.39435100<br>H -0.03897000 1.40755800<br>0.30734900<br>P 2.25761300 0.24990700 -<br>0.14601000<br>O 1.39462600 1.48575400<br>0.19325700                                                                                     | <b>2F-2Me</b><br>P -1.93440500 -0.00159100<br>0.04798000<br>O -1.03865800 0.56203900<br>1.12431000<br>O -1.32077900 -0.66461800 -<br>1.23270500<br>H -0.24720800 -0.73714900 -<br>1.17502500<br>P 1.95334000 -0.05011500 -<br>0.05105700<br>O 1.12970100 -0.84313300 -<br>1.10030200                                                                               | <b>2F-MeF</b><br>P -2.04802800 0.06287700 -<br>0.01471400<br>O -1.18659500 1.29700400<br>0.03597000<br>O -1.39755500 -1.37199300 -<br>0.07745700<br>H -0.37274900 -1.32965500 -<br>0.14848400<br>P 2.04190600 -0.06245400 -<br>0.01268000<br>O 1.12649100 -1.24989100 -<br>0.28867000                                                                                  |

|                                                                                                                                                                                                                                                                                                                                                                                                |                                                                                                                                                                                                                                                                                                                                                                                                                                                                                                                               |                                                                                                                                                                                                                                                                                                                                                                                                    |
|------------------------------------------------------------------------------------------------------------------------------------------------------------------------------------------------------------------------------------------------------------------------------------------------------------------------------------------------------------------------------------------------|-------------------------------------------------------------------------------------------------------------------------------------------------------------------------------------------------------------------------------------------------------------------------------------------------------------------------------------------------------------------------------------------------------------------------------------------------------------------------------------------------------------------------------|----------------------------------------------------------------------------------------------------------------------------------------------------------------------------------------------------------------------------------------------------------------------------------------------------------------------------------------------------------------------------------------------------|
| H 3.55153800 0.62574300 -<br>0.56298500<br>O 1.79305300 -0.64153700 -<br>1.43036500<br>H 0.87153400 -0.96396800 -<br>1.25987100<br>C 2.44202100 -0.88410300<br>1.25020100<br>H 3.14227200 -1.68926000<br>0.98360400<br>H 2.80896500 -0.32791300<br>2.12496200<br>H 1.45289700 -1.31316900<br>1.47101600<br>F -2.75537800 0.16974400 -<br>1.07517600<br>F -2.55816600 -0.51408200<br>1.22007100 | O 1.49809100 -0.25507000<br>1.50399300<br>H 0.54064700 -0.00716500<br>1.58061400<br>C 1.90124900 1.73331200 -<br>0.37036400<br>H 2.23159400 1.93028000 -<br>1.40083600<br>H 0.86059500 2.06930600 -<br>0.24667700<br>H 2.54302700 2.26487300<br>0.34742100<br>F -2.97378700 1.07948600 -<br>0.50630400<br>F -3.00346400 -1.04976800<br>0.60806500<br>C 3.66793600 -0.60529500 -<br>0.01449100<br>H 3.67647200 -1.67823500<br>0.22486000<br>H 4.11851300 -0.44762100 -<br>1.00502600<br>H 4.22565600 -0.04801400<br>0.75174200 | O 1.43069100 1.40329400 -<br>0.23396300<br>H 0.43396500 1.41280200 -<br>0.12632600<br>C 3.60612500 -0.06763900 -<br>0.88269200<br>H 4.14728700 -0.98944200 -<br>0.62941600<br>H 3.40390100 -0.03610400 -<br>1.96203100<br>H 4.18880000 0.81316700 -<br>0.58033600<br>F -3.10394200 0.08195700 -<br>1.20963200<br>F -3.08688800 -0.03142300<br>1.18929100<br>F 2.50967800 -0.06148900<br>1.53885300 |
| <b>2F-MeCl</b><br>P -2.16700700 0.01273300<br>0.06187200<br>O -1.30881000 0.12690700<br>1.29408800<br>O -1.53195800 0.10619600 -                                                                                                                                                                                                                                                               | <b>2F-MeBr</b><br>P -2.44904100 -0.02460800<br>0.06225200<br>O -1.61714400 0.21581600<br>1.29412700<br>O -1.84567700 0.18966700 -                                                                                                                                                                                                                                                                                                                                                                                             | <b>2Cl-2Cl</b><br>P -1.98196500 -0.15411900<br>0.06652100<br>O -1.11996400 -0.17950900<br>1.31797300<br>O -1.39956100 -0.79824700 -                                                                                                                                                                                                                                                                |

|                                                                                                                                                                                                                                                                                                                                                                                                                                                                                                                                          |                                                                                                                                                                                                                                                                                                                                                                                                                                                                                                                                           |                                                                                                                                                                                                                                                                                                                                                                                                                     |
|------------------------------------------------------------------------------------------------------------------------------------------------------------------------------------------------------------------------------------------------------------------------------------------------------------------------------------------------------------------------------------------------------------------------------------------------------------------------------------------------------------------------------------------|-------------------------------------------------------------------------------------------------------------------------------------------------------------------------------------------------------------------------------------------------------------------------------------------------------------------------------------------------------------------------------------------------------------------------------------------------------------------------------------------------------------------------------------------|---------------------------------------------------------------------------------------------------------------------------------------------------------------------------------------------------------------------------------------------------------------------------------------------------------------------------------------------------------------------------------------------------------------------|
| 1.37788500<br>H -0.52778800 0.33939100 -<br>1.34751800<br>P 1.81504600 0.37494300 -<br>0.06844600<br>O 0.92742800 0.70716000 -<br>1.27106500<br>O 1.24886600 0.76781300<br>1.38759400<br>H 0.27264700 0.54920800<br>1.44826600<br>C 3.45697600 1.09980100 -<br>0.11437900<br>H 3.96245000 0.76113000 -<br>1.02897700<br>H 3.34312800 2.19376100 -<br>0.12593000<br>H 4.01550400 0.78093200<br>0.77610600<br>F -3.37767800 1.05112300<br>0.04275000<br>F -3.03056100 -1.32561500<br>0.01804500<br>Cl 2.14479800 -1.66073800<br>0.01493600 | 1.37850300<br>H -0.88634900 0.56718400 -<br>1.34897100<br>P 1.41901600 0.86075600 -<br>0.06822200<br>O 0.50415800 1.13558300 -<br>1.26714900<br>O 0.83090400 1.20268100<br>1.39472000<br>H -0.10817900 0.86183900<br>1.46705200<br>C 2.99897700 1.71636900 -<br>0.11204800<br>H 3.52256500 1.43199100 -<br>1.03497300<br>H 2.79749500 2.79808800 -<br>0.10576200<br>H 3.58646700 1.42862900<br>0.77042800<br>F -3.81472800 0.79933800<br>0.05634600<br>F -3.07979700 -1.48706900<br>0.00560300<br>Br 1.93192300 -1.30538700<br>0.00317100 | 1.27675300<br>H -0.41085700 -0.58471800 -<br>1.35621500<br>P 1.98196400 -0.15411600 -<br>0.06649700<br>O 1.11987100 -0.17952000 -<br>1.31788300<br>O 1.39959700 -0.79822600<br>1.27681000<br>H 0.41089100 -0.58478800<br>1.35625500<br>Cl 2.53093800 1.75303000<br>0.39540300<br>Cl 3.74314900 -1.12255300 -<br>0.28417100<br>Cl -3.74318900 -1.12252000<br>0.28410800<br>Cl -2.53087300 1.75304600 -<br>0.39543300 |
| <b>2Cl-2Br</b><br>P -1.27995600 -0.20244500 -<br>0.04053600<br>O -0.42969000 -0.53175500 -<br>1.26129800                                                                                                                                                                                                                                                                                                                                                                                                                                 | <b>2Cl-ClF</b><br>P -2.21126800 0.29728400<br>0.06997900<br>O -1.32404300 0.27267500<br>1.29427100                                                                                                                                                                                                                                                                                                                                                                                                                                        | <b>2Cl-BrF</b><br>P -1.70900200 0.75607900<br>0.06986100<br>O -0.81700900 0.77237200<br>1.29341000                                                                                                                                                                                                                                                                                                                  |

|                                                                                                                                                                                                                                                                                                                                                                                                                                           |                                                                                                                                                                                                                                                                                                                                                                                                                                                   |                                                                                                                                                                                                                                                                                                                                                                                                                                                |
|-------------------------------------------------------------------------------------------------------------------------------------------------------------------------------------------------------------------------------------------------------------------------------------------------------------------------------------------------------------------------------------------------------------------------------------------|---------------------------------------------------------------------------------------------------------------------------------------------------------------------------------------------------------------------------------------------------------------------------------------------------------------------------------------------------------------------------------------------------------------------------------------------------|------------------------------------------------------------------------------------------------------------------------------------------------------------------------------------------------------------------------------------------------------------------------------------------------------------------------------------------------------------------------------------------------------------------------------------------------|
| O -0.69129000 -0.55359700<br>1.41102800<br>H 0.28524200 -0.28209100<br>1.43985400<br>P 2.65800900 -0.04120700<br>0.04523700<br>O 1.78791900 0.22321900<br>1.26258400<br>O 2.04563700 0.22868100 -<br>1.40756900<br>H 1.06844900 -0.04923600 -<br>1.42041000<br>Cl 3.34247300 -1.96248400<br>0.02813000<br>Br -1.78941700 1.94266600<br>0.00583600<br>Br -3.19292800 -1.25237600 -<br>0.03509000<br>Cl 4.34323200 1.07387100<br>0.02457200 | O -1.55705900 0.47962900 -<br>1.36762600<br>H -0.59356300 0.16208100 -<br>1.36801000<br>P 1.78413200 -0.15706700 -<br>0.04695100<br>O 0.88386700 -0.36899100 -<br>1.25276700<br>O 1.18079700 -0.43213400<br>1.40927000<br>H 0.20332800 -0.17256300<br>1.42437100<br>Cl 2.53299100 1.73834700 -<br>0.00283500<br>F -3.27333600 1.48920200<br>0.09432100<br>Cl -3.44569500 -1.29982900 -<br>0.03423600<br>Cl 3.42969200 -1.32704900 -<br>0.07562600 | O -1.05722900 0.94398000 -<br>1.37192200<br>H -0.14598900 0.50253100 -<br>1.39693700<br>P 2.15964200 -0.18184800 -<br>0.04868100<br>O 1.24087200 -0.25612500 -<br>1.25663000<br>O 1.52208000 -0.37352900<br>1.40689400<br>H 0.60550900 0.05384200<br>1.43246200<br>Br -2.99122700 -1.00868900 -<br>0.00836700<br>Cl 3.61573800 -1.58100900 -<br>0.07779500<br>Cl 3.17677100 1.58386100<br>0.00311400<br>F -2.78983700 1.93246700<br>0.07057600 |
| <b>2Cl-BrCl</b><br>P -1.61803300 0.56071900<br>0.05385000<br>O -0.73518000 0.77349000<br>1.27486100<br>O -0.99760600 0.85170900 -<br>1.39525400<br>H -0.06095100 0.46656000 -<br>1.43061300<br>P 2.27217500 -0.07665700 -                                                                                                                                                                                                                 | <b>2Cl-HMe</b><br>P 1.14766900 -0.14271200 -<br>0.04259300<br>O 0.26177100 -0.46369000 -<br>1.23412400<br>O 0.66502100 -0.54734700<br>1.41503500<br>H -0.37412500 -0.41176100<br>1.48839500<br>P -2.64551100 -0.23380500                                                                                                                                                                                                                          | <b>2Cl-2Me</b><br>P 1.45290500 -0.16841100 -<br>0.03911300<br>O 0.62431000 -0.40572800 -<br>1.29094600<br>O 0.87503300 -0.58930900<br>1.37135000<br>H -0.19061500 -0.43996300<br>1.39562400<br>P -2.36032300 -0.08301000                                                                                                                                                                                                                       |

|                                                                                                                                                                                                                                                                                                                             |                                                                                                                                                                                                                                                                                                                                                                                                                                                                 |                                                                                                                                                                                                                                                                                                                                                                                                                                                                                                                                                                                                   |
|-----------------------------------------------------------------------------------------------------------------------------------------------------------------------------------------------------------------------------------------------------------------------------------------------------------------------------|-----------------------------------------------------------------------------------------------------------------------------------------------------------------------------------------------------------------------------------------------------------------------------------------------------------------------------------------------------------------------------------------------------------------------------------------------------------------|---------------------------------------------------------------------------------------------------------------------------------------------------------------------------------------------------------------------------------------------------------------------------------------------------------------------------------------------------------------------------------------------------------------------------------------------------------------------------------------------------------------------------------------------------------------------------------------------------|
| 0.04668800<br>O 1.36994300 -0.21903700 -<br>1.26100000<br>O 1.63590200 -0.27655900<br>1.40735600<br>H 0.69950700 0.11544300<br>1.42488500<br>Br -2.40507100 -1.49417700 -<br>0.00723800<br>Cl 3.80071100 -1.39836500 -<br>0.04192200<br>Cl -3.25990900 1.74108500<br>0.05849800<br>Cl 3.19698200 1.74059900 -<br>0.01987400 | 0.18830800<br>O -1.81945400 -0.20218800<br>1.49362500<br>H -3.99216700 -0.57764900<br>0.43244600<br>O -2.25294100 -1.38207500 -<br>0.90111300<br>H -1.30841800 -1.23956200 -<br>1.16941300<br>C -2.63736200 1.35407700 -<br>0.67738800<br>H -3.30266900 1.30435400 -<br>1.55182500<br>H -2.96542900 2.14467700<br>0.01305300<br>H -1.60622600 1.55478900 -<br>1.00619800<br>Cl 2.99960700 -0.96131300 -<br>0.16246200<br>Cl 1.53013800 1.87371500<br>0.01450700 | 0.06432100<br>O -1.57171700 -0.24623900<br>1.39118100<br>O -1.95981600 -1.12690900 -<br>1.12569400<br>H -0.99171700 -1.02102600 -<br>1.32197500<br>Cl 1.92597600 1.82959000<br>0.10143900<br>Cl 3.27614500 -1.06218200 -<br>0.10373600<br>C -2.16320500 1.58422500 -<br>0.62002700<br>H -2.47039800 2.32499700<br>0.13292800<br>H -1.09938900 1.72956200 -<br>0.86239000<br>H -2.76498300 1.69219400 -<br>1.53430400<br>C -4.11434600 -0.43249900<br>0.29406700<br>H -4.21409000 -1.46587700<br>0.65570400<br>H -4.52341000 0.25905800<br>1.04475100<br>H -4.64736900 -0.31845600 -<br>0.66075500 |
| <b>2Cl-MeF</b><br>P -1.55469000 -0.12300100 -<br>0.05600900                                                                                                                                                                                                                                                                 | <b>2Cl-MeCl</b><br>P 1.70117000 -0.09247200 -<br>0.05898000                                                                                                                                                                                                                                                                                                                                                                                                     | <b>2Cl-MeBr</b><br>P -1.98804800 0.18365700<br>0.06079900                                                                                                                                                                                                                                                                                                                                                                                                                                                                                                                                         |



|                                                                                                                                                                                                                                                                                                                                                                                                                                                                                                                                                                                                                           |                                                                                                                                                                                                                                                                                                                                                                                                                                                                                                                                                                                                                      |                                                                                                                                                                                                                                                                                                                                                                                                                                                                                                                                                                                                                      |
|---------------------------------------------------------------------------------------------------------------------------------------------------------------------------------------------------------------------------------------------------------------------------------------------------------------------------------------------------------------------------------------------------------------------------------------------------------------------------------------------------------------------------------------------------------------------------------------------------------------------------|----------------------------------------------------------------------------------------------------------------------------------------------------------------------------------------------------------------------------------------------------------------------------------------------------------------------------------------------------------------------------------------------------------------------------------------------------------------------------------------------------------------------------------------------------------------------------------------------------------------------|----------------------------------------------------------------------------------------------------------------------------------------------------------------------------------------------------------------------------------------------------------------------------------------------------------------------------------------------------------------------------------------------------------------------------------------------------------------------------------------------------------------------------------------------------------------------------------------------------------------------|
| O -0.71553400 -0.36621800 -<br>1.29808100<br>O -0.91602900 -0.41558800<br>1.37502100<br>H 0.09398500 -0.22286700<br>1.36396200<br>P 2.48733900 -0.04355800<br>0.06541800<br>O 1.58906800 0.03833200<br>1.29481500<br>O 1.88091400 -0.73180800 -<br>1.24885900<br>H 0.88521700 -0.60701400 -<br>1.31460200<br>C 4.08491100 -0.81557700<br>0.30693200<br>H 4.61944300 -0.27739500<br>1.10159400<br>H 3.92494200 -1.86071400<br>0.60541000<br>H 4.65204800 -0.77231300 -<br>0.63282600<br>Cl -2.23632400 1.80096600 -<br>0.00043500<br>Cl -3.26054700 -1.21896900 -<br>0.01937400<br>F 2.89606900 1.44893800 -<br>0.41696500 | O 0.84256300 -0.23199300 -<br>1.30395800<br>O 1.03700300 -0.33033000<br>1.37040900<br>H 0.07104800 0.03041100<br>1.37384100<br>P -2.23833300 0.34670200<br>0.06251300<br>O -1.33100600 0.60344600<br>1.26941000<br>O -1.62647100 0.66024900 -<br>1.39382600<br>H -0.67406100 0.34145300 -<br>1.44939100<br>Cl 2.58482800 1.75022900<br>0.02039300<br>Cl 3.27460300 -1.36832300 -<br>0.04198900<br>Cl -2.77901800 -1.64443300<br>0.00396500<br>C -3.79804100 1.23717300<br>0.08487600<br>H -4.34084000 0.96666400<br>1.00081700<br>H -3.57290600 2.31378200<br>0.08063300<br>H -4.38128000 0.96319700 -<br>0.80469400 | O -1.19778300 0.51462200<br>1.31425100<br>O -1.53988500 0.81867700 -<br>1.33059700<br>H -0.51898900 0.95599800 -<br>1.35866300<br>P 1.85306600 0.90268300 -<br>0.11210600<br>O 0.98407400 1.18354000 -<br>1.34259000<br>O 1.28488300 1.38379200<br>1.31853900<br>H 0.32771900 1.09561100<br>1.41690900<br>C 3.50793200 1.60248700 -<br>0.17811800<br>H 4.01124900 1.22096100 -<br>1.07694100<br>H 3.40967200 2.69712100 -<br>0.23219200<br>H 4.05678800 1.30910700<br>0.72702600<br>Cl -2.07381800 -1.83633700 -<br>0.23500700<br>Br 2.16270000 -1.29486200<br>0.09798200<br>Cl -3.94113000 0.71435500<br>0.19124000 |
| <b>2Br-2Br</b><br>P -1.94336400 -0.39061900                                                                                                                                                                                                                                                                                                                                                                                                                                                                                                                                                                               | <b>2Br-ClF</b><br>P -1.11000200 -0.27704600 -                                                                                                                                                                                                                                                                                                                                                                                                                                                                                                                                                                        | <b>2Br-BrF</b><br>P -1.49963200 -0.32617100 -                                                                                                                                                                                                                                                                                                                                                                                                                                                                                                                                                                        |

|                                                                                                                                                                                                                                                                                                                                                                                                                                                                                                             |                                                                                                                                                                                                                                                                                                                                                                                                                                                                                                         |                                                                                                                                                                                                                                                                                                                                                                                                                                                                                                          |
|-------------------------------------------------------------------------------------------------------------------------------------------------------------------------------------------------------------------------------------------------------------------------------------------------------------------------------------------------------------------------------------------------------------------------------------------------------------------------------------------------------------|---------------------------------------------------------------------------------------------------------------------------------------------------------------------------------------------------------------------------------------------------------------------------------------------------------------------------------------------------------------------------------------------------------------------------------------------------------------------------------------------------------|----------------------------------------------------------------------------------------------------------------------------------------------------------------------------------------------------------------------------------------------------------------------------------------------------------------------------------------------------------------------------------------------------------------------------------------------------------------------------------------------------------|
| 0.06420800<br>O -1.12524800 -0.55961400<br>1.33793400<br>O -1.41909000 -1.09634800 -<br>1.27841700<br>H -0.42388900 -0.92431700 -<br>1.37443900<br>P 1.94336600 -0.39065700 -<br>0.06416100<br>O 1.12529900 -0.55988200 -<br>1.33788200<br>O 1.41914000 -1.09624800<br>1.27856100<br>H 0.42389800 -0.92440000<br>1.37450600<br>Br 2.18650100 1.74814300<br>0.41634300<br>Br 3.97387000 -1.17576500 -<br>0.23760800<br>Br -3.97383400 -1.17583400<br>0.23758000<br>Br -2.18656100 1.74815900 -<br>0.41638200 | 0.04477400<br>O -0.29792400 -0.69678000 -<br>1.26336000<br>O -0.62639000 -0.78065900<br>1.40172400<br>H 0.37111200 -0.63591000<br>1.47732300<br>P 2.83208900 -0.55567200<br>0.15085900<br>O 1.93842300 -0.30060700<br>1.34424900<br>O 2.22704000 -1.24608000 -<br>1.14695100<br>H 1.23486500 -1.04884700 -<br>1.23092500<br>Br -1.24046500 1.92029400<br>0.07871800<br>Br -3.17554200 -0.97676900 -<br>0.11200200<br>Cl 3.79857100 1.11595600 -<br>0.44672800<br>F 4.06867600 -1.51400800<br>0.47070700 | 0.04610200<br>O -0.72384000 -0.80109100 -<br>1.26775800<br>O -1.15712000 -0.98462700<br>1.37876500<br>H -0.15456100 -0.97616600<br>1.50254800<br>P 2.33849700 -0.97356000<br>0.22479300<br>O 1.45136800 -0.82123900<br>1.44228000<br>O 1.73692000 -1.60717000 -<br>1.10710900<br>H 0.77139000 -1.32134500 -<br>1.22437600<br>Br -1.27132200 1.85210600<br>0.21452200<br>Br -3.64692000 -0.67271200 -<br>0.21021600<br>F 3.59722700 -1.92763600<br>0.46909700<br>Br 3.31728500 0.90218400 -<br>0.31144400 |
| <b>2Br-BrCl</b><br>P 1.74254200 -0.19230800<br>0.04226200<br>O 0.92564400 -0.58807200<br>1.26606900<br>O 1.18034400 -0.59028300 -<br>1.40763700                                                                                                                                                                                                                                                                                                                                                             | <b>2Br-HMe</b><br>P 0.57098200 -0.28775300 -<br>0.01365700<br>O -0.25630800 -0.72237500 -<br>1.21548500<br>O 0.09481300 -0.70642100<br>1.44648500                                                                                                                                                                                                                                                                                                                                                       | <b>2Br-2Me</b><br>P 0.81593700 -0.28359600 -<br>0.03018900<br>O 0.01402500 -0.62279500 -<br>1.28012800<br>O 0.24642200 -0.68777000<br>1.39263800                                                                                                                                                                                                                                                                                                                                                         |

|                                            |                                           |                                           |
|--------------------------------------------|-------------------------------------------|-------------------------------------------|
| H 0.18655400 -0.38773900 -<br>1.43641200   | H -0.94945800 -0.59813000<br>1.51005800   | H -0.81964800 -0.52901700<br>1.41623700   |
| P -2.19325000 -0.32703100 -<br>0.03942900  | P -3.20204900 -0.51389900<br>0.17390400   | P -2.98504800 -0.26968900<br>0.06236000   |
| O -1.34307300 0.01467700 -<br>1.25411100   | O -2.39896900 -0.42627300<br>1.49136400   | O -2.19705100 -0.32258000<br>1.39910100   |
| O -1.60108900 -0.01992400<br>1.41689600    | H -4.54178400 -0.89279600<br>0.40442400   | O -2.55388800 -1.38208100 -<br>1.05233300 |
| H -0.60510400 -0.22338100<br>1.42719900    | O -2.75551300 -1.67487700 -<br>0.88021500 | H -1.58855700 -1.26454300 -<br>1.25777800 |
| Br -4.10179300 0.72862700 -<br>0.01438700  | H -1.80990100 -1.51189000 -<br>1.13556300 | Br 2.83661600 -1.14045700 -<br>0.04421200 |
| Cl -2.70272600 -2.30621100 -<br>0.03455200 | C -3.22669400 1.05328200 -<br>0.72838900  | Br 1.15763000 1.91620000<br>0.03748700    |
| Br 2.07729600 1.98708200 -<br>0.00606200   | H -3.86566500 0.96001500 -<br>1.61869700  | C -4.73050300 -0.64748800<br>0.31230800   |
| Br 3.73395200 -1.08497700<br>0.03143200    | H -3.60156700 1.84616500 -<br>0.06470200  | H -4.80504900 -1.65769000<br>0.73961100   |
|                                            | H -2.19467200 1.28657000 -<br>1.03188600  | H -5.15866700 0.08047400<br>1.01646600    |
|                                            | Br 2.64541300 -0.99010300 -<br>0.08165500 | H -5.26361700 -0.60874900 -<br>0.64849300 |
|                                            | Br 0.73507300 1.92880900<br>0.00067800    | C -2.82778000 1.35169600 -<br>0.73275000  |
|                                            |                                           | H -3.16206800 2.13263500 -<br>0.03369500  |
|                                            |                                           | H -1.76609800 1.51183300 -<br>0.97497800  |
|                                            |                                           | H -3.42461600 1.37987500 -<br>1.65613800  |

| <b>2Br-MeF</b>                             | <b>2Br-MeCl</b>                            | <b>2Br-MeBr</b>                           |
|--------------------------------------------|--------------------------------------------|-------------------------------------------|
| P -0.88899000 -0.25820500 -<br>0.05659800  | P -1.04400200 -0.31332100 -<br>0.04747300  | P 1.37202300 -0.32967400 -<br>0.04305300  |
| O -0.09195700 -0.62269100 -<br>1.30118900  | O -0.26554000 -0.72261500 -<br>1.28977600  | O 0.58668900 -0.72922100 -<br>1.28420200  |
| O -0.28953400 -0.63938800<br>1.37629200    | O -0.53178200 -0.81322600<br>1.38202400    | O 0.93510200 -0.93152200<br>1.37183800    |
| H 0.72344300 -0.46685100<br>1.38276000     | H 0.49718000 -0.79118000<br>1.41512500     | H -0.09078300 -1.01193600<br>1.42556200   |
| P 3.11772500 -0.23557600<br>0.06605100     | P 2.85975000 -0.59554900<br>0.11596900     | P -2.47171200 -1.02307000<br>0.17781400   |
| O 2.22622000 -0.21438900<br>1.30266200     | O 2.02138700 -0.77875200<br>1.38331200     | O -1.60651400 -1.16045000<br>1.43518700   |
| O 2.51702800 -0.88394100 -<br>1.27081100   | O 2.30538200 -1.26529900 -<br>1.23948100   | O -1.88116000 -1.62860500 -<br>1.19522500 |
| H 1.51657100 -0.78937300 -<br>1.32434400   | H 1.31908300 -1.09502100 -<br>1.33770700   | H -0.92881200 -1.33152300 -<br>1.31918400 |
| C 4.72990900 -0.98764300<br>0.27173300     | C 4.55418300 -1.18025700<br>0.23296300     | Br -2.83632100 1.13412800 -<br>0.24868100 |
| H 5.26026500 -0.46758800<br>1.08112000     | H 5.04378900 -0.66473600<br>1.07038200     | Br 3.49132200 -0.87458100 -<br>0.16094800 |
| H 4.58932000 -2.04483400<br>0.53550000     | H 4.52525100 -2.26394700<br>0.41917700     | Br 1.37861600 1.86760500<br>0.19360800    |
| H 5.29019200 -0.90304900 -<br>0.66930800   | H 5.07472300 -0.96600100 -<br>0.71022800   | C -4.11009100 -1.75343000<br>0.30311100   |
| Br -1.28929600 1.91429600 -<br>0.00191300  | Br -1.18757600 1.88862100<br>0.08336600    | H -3.98595400 -2.83478200<br>0.46471800   |
| Br -2.86991500 -1.18965700 -<br>0.00834800 | Cl 3.03598200 1.41749100 -<br>0.31402600   | H -4.62893100 -1.29846200<br>1.15786600   |
| F 3.49867200 1.28057900 -<br>0.36382100    | Br -3.12295600 -1.00184200 -<br>0.07857000 | H -4.65915100 -1.56347300 -<br>0.62908100 |

|                                                                                                                                                                                                                                                                                                                                                                                                                                                                                                                                                        |                                                                                                                                                                                                                                                                                                                                                                                                                                                                                                                                                     |                                                                                                                                                                                                                                                                                                                                                                                                                                                                                                                                                            |
|--------------------------------------------------------------------------------------------------------------------------------------------------------------------------------------------------------------------------------------------------------------------------------------------------------------------------------------------------------------------------------------------------------------------------------------------------------------------------------------------------------------------------------------------------------|-----------------------------------------------------------------------------------------------------------------------------------------------------------------------------------------------------------------------------------------------------------------------------------------------------------------------------------------------------------------------------------------------------------------------------------------------------------------------------------------------------------------------------------------------------|------------------------------------------------------------------------------------------------------------------------------------------------------------------------------------------------------------------------------------------------------------------------------------------------------------------------------------------------------------------------------------------------------------------------------------------------------------------------------------------------------------------------------------------------------------|
| <b>CIF-CIF</b><br>P 1.99259100 0.29544500<br>0.02428300<br>O 1.08124100 0.22875800<br>1.23016000<br>O 1.40989400 -0.06424900 -<br>1.41064300<br>H 0.39719100 -0.09573200 -<br>1.39855000<br>P -2.04396300 -0.36008100 -<br>0.10057800<br>O -1.17708800 -0.11872800 -<br>1.31638300<br>O -1.35345500 -0.64752100<br>1.30262000<br>H -0.39843700 -0.31152200<br>1.31139900<br>F -3.01116400 -1.62211400 -<br>0.25314800<br>F 2.62960900 1.75403300 -<br>0.15504900<br>Cl 3.66341200 -0.81486800<br>0.19162100<br>Cl -3.39746600 1.10918700<br>0.18833800 | <b>CIF-BrF</b><br>P -1.51046100 0.71753300 -<br>0.10756400<br>O -0.65322500 0.53105200 -<br>1.34218600<br>O -0.80179900 0.88087300<br>1.30971800<br>H 0.09943200 0.42009300<br>1.31136800<br>P 2.42455600 -0.33230000 -<br>0.00668700<br>O 1.49461100 -0.31417900<br>1.18685100<br>O 1.92107800 0.26145000 -<br>1.39303200<br>H 0.91430700 0.38075500 -<br>1.39780700<br>Br -3.03528000 -0.82708800<br>0.08492900<br>F 2.90629900 -1.81984000 -<br>0.35489300<br>F -2.41379000 2.03637500 -<br>0.15719200<br>Cl 4.19951500 0.56155200<br>0.31445000 | <b>CIF-BrCl</b><br>P -2.67323200 -0.43856400<br>0.15448400<br>O -1.82393400 -0.04566500<br>1.34351800<br>O -1.97286500 -1.04610900 -<br>1.13698300<br>H -1.02064000 -0.70545500 -<br>1.22196400<br>P 1.28768100 0.18038700 -<br>0.02271300<br>O 0.43404600 -0.11186100 -<br>1.24825800<br>O 0.76190100 -0.32157300<br>1.40531900<br>H -0.24627100 -0.23102500<br>1.44992800<br>F -3.75550500 -1.56511100<br>0.48573600<br>Br 3.28557600 -0.69106800 -<br>0.12866400<br>Cl 1.61980600 2.18517100<br>0.16143600<br>Cl -3.87502100 1.06683900 -<br>0.45447700 |
| <b>CIF-HMe</b><br>P 1.35735100 -0.35812800 -<br>0.10351600<br>O 0.39168000 -0.32031900 -<br>1.26845100                                                                                                                                                                                                                                                                                                                                                                                                                                                 | <b>CIF-2Me</b><br>P 1.66670800 -0.37556200 -<br>0.08296600<br>O 0.77074000 -0.26597500 -<br>1.29922000                                                                                                                                                                                                                                                                                                                                                                                                                                              | <b>CIF-MeF</b><br>P -1.77143000 0.34873000<br>0.06713100<br>O -0.89711100 0.33413700<br>1.30072300                                                                                                                                                                                                                                                                                                                                                                                                                                                         |

|                                           |                                           |                                            |
|-------------------------------------------|-------------------------------------------|--------------------------------------------|
| O 0.83279800 -0.73401900<br>1.33848600    | O 1.04703800 -0.71257200<br>1.32380800    | O -1.10908400 0.50863600 -<br>1.36415200   |
| H -0.18955100 -0.51295500<br>1.42643600   | H -0.01435200 -0.53363100<br>1.33981400   | H -0.10376600 0.29557200 -<br>1.34196100   |
| P -2.46719300 -0.04485400<br>0.20975800   | P -2.17380200 0.04817000<br>0.07564500    | P 2.28266800 -0.06876400 -<br>0.06758400   |
| O -1.60671900 -0.18844200<br>1.48465400   | O -1.38432000 -0.31271900<br>1.36192400   | O 1.38147400 0.01197800 -<br>1.29461500    |
| H -3.82525200 -0.33160400<br>0.46360200   | O -1.84789300 -0.87286200 -<br>1.23316700 | O 1.72169700 0.54868700<br>1.30151100      |
| O -2.17470100 -1.10227000 -<br>0.99696800 | H -0.87661300 -0.80335200 -<br>1.42514500 | H 0.72111000 0.48664800<br>1.35615700      |
| H -1.22803300 -0.99519700 -<br>1.27275700 | C -1.88562300 1.76819700 -<br>0.41903200  | C 3.92729700 0.61362600 -<br>0.25437200    |
| C -2.38605600 1.61553700 -<br>0.50183300  | H -2.50007900 2.01840800 -<br>1.29625200  | H 4.42585300 0.10678400 -<br>1.09184200    |
| H -3.08551700 1.69211300 -<br>1.34721100  | H -2.12626000 2.43502400<br>0.42197800    | H 3.83632800 1.68748800 -<br>0.46767500    |
| H -2.63455000 2.35557200<br>0.27267700    | H -0.82083400 1.87132700 -<br>0.67796800  | H 4.48972600 0.45820500<br>0.67631700      |
| H -1.35711900 1.78029600 -<br>0.85643200  | C -3.94249800 -0.22516600<br>0.29420300   | F -2.85130800 1.53056300<br>0.07451200     |
| F 2.57031300 -1.38216000 -<br>0.30846900  | H -4.09786400 -1.28465900<br>0.54306000   | Cl -3.00192900 -1.25576300 -<br>0.02558000 |
| Cl 2.38863000 1.38606600<br>0.06150000    | H -4.30402600 0.40198400<br>1.12186400    | F 2.59079600 -1.61895000<br>0.29095000     |
|                                           | H -4.47726700 0.02214300 -<br>0.63402700  |                                            |
|                                           | F 2.82626500 -1.46962800 -<br>0.25203000  |                                            |
|                                           | Cl 2.80420800 1.29794800<br>0.14746900    |                                            |

|                                          |                                            |                                          |
|------------------------------------------|--------------------------------------------|------------------------------------------|
| <b>ClF-MeCl</b>                          | <b>ClF-MeBr</b>                            | <b>BrF-BrF</b>                           |
| P -1.90318200 0.38938900<br>0.09419700   | P -2.16370600 0.42300000<br>0.08818700     | P -1.83945400 0.77791400 -<br>0.08739200 |
| O -1.02078000 0.43517900<br>1.32092300   | O -1.33374400 0.67771300<br>1.32558300     | O -0.94885000 0.59765400 -<br>1.29857800 |
| O -1.31030400 0.78038900 -<br>1.32250700 | O -1.63938500 0.89615200 -<br>1.33103500   | O -1.17510400 0.88151600<br>1.35777000   |
| H -0.28053500 0.74845400 -<br>1.32745800 | H -0.61957300 1.04091400 -<br>1.33152200   | H -0.33881400 0.31564900<br>1.39568900   |
| P 2.06004700 0.31115000 -<br>0.09010000  | P 1.71590400 0.81059300 -<br>0.08400700    | P 1.84525400 -0.78597600<br>0.08004600   |
| O 1.23025000 0.73004300 -<br>1.30616100  | O 0.87922000 1.26319400 -<br>1.28532100    | O 0.94637600 -0.62500600<br>1.28791900   |
| O 1.58015600 0.85166200<br>1.34967000    | O 1.23150000 1.29465000<br>1.37692100      | O 1.18909200 -0.88527400 -<br>1.36909200 |
| H 0.58738800 0.74354800<br>1.44131600    | H 0.24993400 1.11791700<br>1.47515200      | H 0.34663100 -0.32857700 -<br>1.40599400 |
| C 3.79856700 0.75405200 -<br>0.16801600  | C 3.44821500 1.28624300 -<br>0.14516400    | Br -3.42471600 -0.71687300<br>0.02085200 |
| H 4.23204100 0.30673800 -<br>1.07286200  | H 3.88657200 0.88441000 -<br>1.06882500    | F 2.70638400 -2.13089000<br>0.11872100   |
| H 3.86589700 1.85083300 -<br>0.21714500  | H 3.49597900 2.38560500 -<br>0.14780900    | Br 3.41406900 0.72748700 -<br>0.00896000 |
| H 4.30627300 0.37748600<br>0.73027600    | H 3.96259100 0.88046200<br>0.73652100      | F -2.68574700 2.13213900 -<br>0.13204100 |
| F -3.18112900 1.34687400<br>0.20412800   | F -3.61126400 1.10157500<br>0.15509400     |                                          |
| Cl 2.05142300 -1.74698800<br>0.08068100  | Cl -2.69046400 -1.52504200 -<br>0.09878900 |                                          |
| Cl -2.81965000 -1.40357200 -             | Br 1.71973700 -1.41636500                  |                                          |

|                                           |                                           |                                           |
|-------------------------------------------|-------------------------------------------|-------------------------------------------|
| 0.12656600                                | 0.02111900                                |                                           |
| <b>BrF-BrCl</b>                           | <b>BrF-HMe</b>                            | <b>BrF-2Me</b>                            |
| P -1.99351000 0.89312200 -<br>0.22350000  | P 0.89708000 -0.86467000 -<br>0.11133300  | P 1.21415500 -0.86068300 -<br>0.08426500  |
| O -1.06688300 0.82546300 -<br>1.41904300  | O -0.03565400 -0.87223900 -<br>1.30365500 | O 0.35347400 -0.91441500 -<br>1.32938900  |
| O -1.47486300 1.55277900<br>1.13074300    | O 0.34146000 -1.20257000<br>1.33138000    | O 0.58515400 -1.15900200<br>1.33058200    |
| H -0.49576600 1.33389800<br>1.27086500    | H -0.61087800 -0.78260600<br>1.44463200   | H -0.41682600 -0.78594900<br>1.37426600   |
| P 1.87637800 0.55249700<br>0.12515900     | P -2.72201300 0.20274800<br>0.20977800    | P -2.46025000 0.12519700<br>0.07604100    |
| O 1.03317700 0.91223900<br>1.33899100     | O -1.93388400 -0.15007200<br>1.49052900   | O -1.72793000 -0.27924400<br>1.38241300   |
| O 1.51331300 1.22270400 -<br>1.28655100   | H -4.10789900 0.29529000<br>0.45818200    | O -2.33995800 -0.93840300 -<br>1.15776500 |
| H 0.51944500 1.13022500 -<br>1.43815700   | O -2.72262900 -0.91066400 -<br>0.98184300 | H -1.37908800 -1.08153200 -<br>1.35975500 |
| F -3.31454900 1.75261500 -<br>0.48823600  | H -1.78350500 -1.07169200 -<br>1.25581300 | C -1.86146600 1.71759300 -<br>0.55198100  |
| Cl 3.82341300 1.05162300<br>0.33764600    | C -2.19448200 1.77226800 -<br>0.51873800  | H -2.42088300 2.00319500 -<br>1.45484400  |
| Br 1.88232900 -1.62424500 -<br>0.20215800 | H -2.83011600 2.01393900 -<br>1.38313800  | H -1.97647800 2.48258900<br>0.23017300    |
| Br -2.83866500 -1.05875500<br>0.26454100  | H -2.26069100 2.56343700<br>0.24237500    | H -0.79458100 1.61071200 -<br>0.80091700  |
|                                           | H -1.14891200 1.66342100 -<br>0.84529000  | C -4.24494700 0.21227900<br>0.31810900    |
|                                           | Br 1.97210300 1.04905100<br>0.02441800    | H -4.59538100 -0.77706900<br>0.64524100   |



|                                                                                                                                                                                                                                                                                                                                                                                                                                                                                         |                                                                                                                                                                                                                                                                                                                                                                                                                                                                                        |                                                                                                                                                                                                                                                                                                                                                                                                                                                                                        |
|-----------------------------------------------------------------------------------------------------------------------------------------------------------------------------------------------------------------------------------------------------------------------------------------------------------------------------------------------------------------------------------------------------------------------------------------------------------------------------------------|----------------------------------------------------------------------------------------------------------------------------------------------------------------------------------------------------------------------------------------------------------------------------------------------------------------------------------------------------------------------------------------------------------------------------------------------------------------------------------------|----------------------------------------------------------------------------------------------------------------------------------------------------------------------------------------------------------------------------------------------------------------------------------------------------------------------------------------------------------------------------------------------------------------------------------------------------------------------------------------|
|                                                                                                                                                                                                                                                                                                                                                                                                                                                                                         | F 2.11832800 -1.89099800 -<br>0.24123500                                                                                                                                                                                                                                                                                                                                                                                                                                               | H -4.46663800 0.95544100<br>1.09760400<br>H -4.73784800 0.48919200 -<br>0.62485300<br>F 2.46176300 -1.86497100 -<br>0.12854100<br>Br 2.25702400 1.07627800<br>0.05056600                                                                                                                                                                                                                                                                                                               |
| <b>BrF-MeF</b><br>P -1.25675000 0.74119700<br>0.06842100<br>O -0.38712200 0.69442700<br>1.30675900<br>O -0.57661800 0.85909600 -<br>1.36162700<br>H 0.37885000 0.48197000 -<br>1.34972900<br>P 2.69952400 -0.16064100 -<br>0.06819200<br>O 1.79804600 -0.05042900 -<br>1.29281800<br>O 2.23937500 0.61192200<br>1.25922100<br>H 1.23929000 0.66789600<br>1.33153200<br>C 4.41378300 0.29707000 -<br>0.30794100<br>H 4.83380000 -0.32102000 -<br>1.11317000<br>H 4.45436900 1.35785700 - | <b>BrF-MeCl</b><br>P -1.42940000 0.87092600<br>0.10834600<br>O -0.55667200 0.96425800<br>1.34129500<br>O -0.82556800 1.23071500 -<br>1.31552300<br>H 0.18240200 1.02996200 -<br>1.34966900<br>P 2.42487400 0.21702200 -<br>0.10533400<br>O 1.67681700 0.74278200 -<br>1.33244300<br>O 2.08109500 0.89517200<br>1.31529200<br>H 1.08755600 0.97508700<br>1.42485700<br>C 4.21543700 0.30455800 -<br>0.21010100<br>H 4.54012800 -0.25187900 -<br>1.09987000<br>H 4.49670000 1.36401500 - | <b>BrF-MeBr</b><br>P -1.73834000 0.91048300<br>0.12426500<br>O -0.86394400 1.04949300<br>1.35165800<br>O -1.18311800 1.35216600 -<br>1.29618900<br>H -0.15602900 1.29698400 -<br>1.33116500<br>P 2.15077500 0.71359500 -<br>0.11843600<br>O 1.36269700 1.23111300 -<br>1.32614200<br>O 1.76189900 1.31188700<br>1.32877900<br>H 0.76760900 1.27204500<br>1.44983100<br>C 3.93030000 0.94764300 -<br>0.21840000<br>H 4.29446600 0.45797500 -<br>1.13185700<br>H 4.12614500 2.02957700 - |

|                                                                                                                                                                                                                                                                                                                                                                                                                                                                    |                                                                                                                                                                                                                                                                                                                                                                                                                                                                     |                                                                                                                                                                                                                                                                                                                                                                                                                                                                      |
|--------------------------------------------------------------------------------------------------------------------------------------------------------------------------------------------------------------------------------------------------------------------------------------------------------------------------------------------------------------------------------------------------------------------------------------------------------------------|---------------------------------------------------------------------------------------------------------------------------------------------------------------------------------------------------------------------------------------------------------------------------------------------------------------------------------------------------------------------------------------------------------------------------------------------------------------------|----------------------------------------------------------------------------------------------------------------------------------------------------------------------------------------------------------------------------------------------------------------------------------------------------------------------------------------------------------------------------------------------------------------------------------------------------------------------|
| 0.59091500<br>H 4.96520500 0.13288200<br>0.62779300<br>Br -2.67346100 -0.92094300 -<br>0.00916100<br>F 2.81674600 -1.71038700<br>0.39124300<br>F -2.26276000 1.98844800<br>0.04954100                                                                                                                                                                                                                                                                              | 0.30160900<br>H 4.65094700 -0.13165000<br>0.69901400<br>Br -2.40031700 -1.08225500 -<br>0.06488400<br>F -2.70547500 1.83647900<br>0.16627300<br>Cl 2.01014900 -1.79087800<br>0.14989600                                                                                                                                                                                                                                                                             | 0.26234400<br>H 4.40013800 0.50686100<br>0.67128100<br>Br -2.54462500 -1.11193700 -<br>0.09031700<br>F -3.09298300 1.76040500<br>0.21926700<br>Br 1.85936600 -1.48838800<br>0.07285900                                                                                                                                                                                                                                                                               |
| <b>BrCl-BrCl</b><br>P -1.87707900 0.56247500<br>0.05134100<br>O -0.97068800 0.64101700<br>1.27096100<br>O -1.22248000 0.74937000 -<br>1.39979600<br>H -0.35127200 0.23126400 -<br>1.43507700<br>P 1.87749300 -0.56309500 -<br>0.05023600<br>O 0.97006500 -0.64395900 -<br>1.26894800<br>O 1.22422800 -0.74868400<br>1.40165200<br>H 0.35218100 -0.23198800<br>1.43669400<br>Br -2.97231900 -1.34634000 -<br>0.00131100<br>Br 2.97103500 1.34679600 -<br>0.00088200 | <b>BrCl-HMe</b><br>P 0.67593100 0.10044800 -<br>0.00649300<br>O -0.16147900 -0.34418900 -<br>1.19613300<br>O 0.20783900 -0.29797600<br>1.45931300<br>H -0.84303500 -0.27268700<br>1.51169200<br>P -3.08878100 -0.41444500<br>0.17776600<br>O -2.29815400 -0.22507700<br>1.49196700<br>H -4.39007800 -0.90361700<br>0.42006500<br>O -2.54201100 -1.55751500 -<br>0.84886500<br>H -1.61736200 -1.31241300 -<br>1.11342600<br>C -3.25073500 1.12121200 -<br>0.76350200 | <b>BrCl-2Me</b><br>P 1.13260700 -0.61857100 -<br>0.04966000<br>O 0.28685200 -0.82021900 -<br>1.29801200<br>O 0.52050400 -0.95552800<br>1.37142900<br>H -0.50892700 -0.64709500<br>1.40405200<br>P -2.62500600 -0.04181000<br>0.06704000<br>O -1.84689200 -0.24066500<br>1.39526200<br>O -2.36971400 -1.18057400 -<br>1.07515600<br>H -1.39834000 -1.20722700 -<br>1.28242800<br>C -2.23250100 1.55559200 -<br>0.69490400<br>H -2.82182900 1.69202500 -<br>1.61343100 |

|                                                                                                                                                                                                                                                                                                                  |                                                                                                                                                                                                                                                                                                                   |                                                                                                                                                                                                                                                                                                                                                        |
|------------------------------------------------------------------------------------------------------------------------------------------------------------------------------------------------------------------------------------------------------------------------------------------------------------------|-------------------------------------------------------------------------------------------------------------------------------------------------------------------------------------------------------------------------------------------------------------------------------------------------------------------|--------------------------------------------------------------------------------------------------------------------------------------------------------------------------------------------------------------------------------------------------------------------------------------------------------------------------------------------------------|
| Cl 3.31969200 -1.98133100 -<br>0.05142300<br>Cl -3.31799600 1.98204200<br>0.05304800                                                                                                                                                                                                                             | H -3.89042200 0.95286900 -<br>1.64225700<br>H -3.68090900 1.89911600 -<br>0.11605400<br>H -2.24424300 1.42520000 -<br>1.08935000<br>Cl 0.85042100 2.14942800 -<br>0.01512300<br>Br 2.75018600 -0.59851400 -<br>0.08434100                                                                                         | H -2.44488800 2.36198500<br>0.02263000<br>H -1.15973500 1.56246900 -<br>0.94104500<br>C -4.40620700 -0.16139100<br>0.32201500<br>H -4.62837600 -1.15782800<br>0.72988700<br>H -4.71844500 0.60746400<br>1.04344900<br>H -4.93181600 -0.02405300 -<br>0.63385500<br>Br 1.80905400 1.49701900<br>0.04276000<br>Cl 2.86986400 -1.67453000 -<br>0.08220000 |
| <b>BrCl-MeF</b><br>P -1.21181900 -0.59251800 -<br>0.05930900<br>O -0.37111500 -0.82877300 -<br>1.30382000<br>O -0.56653600 -0.88469200<br>1.37225900<br>H 0.41112000 -0.57063400<br>1.38053800<br>P 2.75480900 -0.02030400<br>0.06681600<br>O 1.86340500 -0.10604300<br>1.30068200<br>O 2.25169100 -0.75788200 - | <b>BrCl-MeCl</b><br>P -1.37982300 -0.62873500 -<br>0.07873300<br>O -0.54763100 -0.90980200 -<br>1.31952200<br>O -0.82191000 -1.08331300<br>1.34652100<br>H 0.19448800 -0.93006900<br>1.39181900<br>P 2.52305800 -0.40446400<br>0.11821700<br>O 1.70568400 -0.71700900<br>1.37380100<br>O 2.07350700 -1.11997300 - | <b>BrCl-MeBr</b><br>P -1.71384400 -0.62782800 -<br>0.10266500<br>O -0.87227800 -0.90528500 -<br>1.33799800<br>O -1.23766000 -1.21125300<br>1.30496000<br>H -0.21105100 -1.17745100<br>1.37711300<br>P 2.17691500 -0.88811200<br>0.17136400<br>O 1.31260700 -1.15105000<br>1.40912900<br>O 1.68088900 -1.52472600 -                                     |

|                                                                                                                                                                                                                                                                                                                                                                       |                                                                                                                                                                                                                                                                                                                                                                       |                                                                                                                                                                                                                                                                                                                                                                       |
|-----------------------------------------------------------------------------------------------------------------------------------------------------------------------------------------------------------------------------------------------------------------------------------------------------------------------------------------------------------------------|-----------------------------------------------------------------------------------------------------------------------------------------------------------------------------------------------------------------------------------------------------------------------------------------------------------------------------------------------------------------------|-----------------------------------------------------------------------------------------------------------------------------------------------------------------------------------------------------------------------------------------------------------------------------------------------------------------------------------------------------------------------|
| 1.26422300<br>H 1.24816500 -0.79267000 -<br>1.32353900<br>C 4.45262600 -0.54686900<br>0.28359000<br>H 4.90534700 0.04706600<br>1.08926700<br>H 4.45469200 -1.61097600<br>0.55683100<br>H 4.99977400 -0.39604000 -<br>0.65690800<br>Cl -2.89704700 -1.72112100 -<br>0.01645500<br>F 2.92974100 1.52877600 -<br>0.37837300<br>Br -1.95477500 1.48331400 -<br>0.00041200 | 1.25276700<br>H 1.07497800 -1.07676700 -<br>1.36004600<br>C 4.27891200 -0.76194300<br>0.24357300<br>H 4.68945700 -0.19963800<br>1.09327800<br>H 4.39226300 -1.84277700<br>0.41339800<br>H 4.77391300 -0.46571700 -<br>0.69115300<br>Cl -3.20600000 -1.51142700 -<br>0.13531800<br>Br -1.83167200 1.52477500<br>0.08526200<br>Cl 2.43448300 1.62073600 -<br>0.28053200 | 1.22488300<br>H 0.70363600 -1.33369000 -<br>1.36065100<br>C 3.88531900 -1.43137000<br>0.31112200<br>H 4.33605900 -0.94003800<br>1.18417800<br>H 3.88234700 -2.52320700<br>0.44784800<br>H 4.42354600 -1.15930900 -<br>0.60696400<br>Cl -3.60632600 -1.34607800 -<br>0.25632700<br>Br -1.99164700 1.54231600<br>0.18011700<br>Br 2.30154900 1.30576500 -<br>0.20271300 |
| <b>HMe-HMe</b><br>P 1.81631500 0.16936400<br>0.44230700<br>O 0.87458300 -0.64384700<br>1.35558100<br>O 1.23737400 1.58087800 -<br>0.12641700<br>H 0.40178100 1.37104600 -<br>0.65490600<br>P -1.81612800 -0.16939300 -<br>0.44239100<br>O -0.87515400 0.64534100 -<br>1.35504700                                                                                      | <b>HMe-2Me</b><br>P -2.18399900 0.27178600<br>0.12123100<br>O -1.33403800 0.54997100<br>1.37884300<br>O -1.61100100 0.84670400 -<br>1.28829900<br>H -0.69940800 0.42066100 -<br>1.43295900<br>P 1.56687500 -0.08790900 -<br>0.08403300<br>O 0.66719200 -0.39066900 -<br>1.30665700                                                                                    | <b>HMe-MeF</b><br>P -1.60335400 0.03501700<br>0.07396500<br>O -0.67017000 0.15724900<br>1.27303600<br>O -1.09508600 -0.79874300 -<br>1.18873000<br>H -0.07144000 -0.76585200 -<br>1.28580400<br>P 2.26578000 -0.26842300 -<br>0.10904500<br>O 1.44989900 -0.68335000 -<br>1.35053600                                                                                  |

|                                           |                                           |                                           |
|-------------------------------------------|-------------------------------------------|-------------------------------------------|
| O -1.23579900 -1.58056700<br>0.12575100   | O 1.00778300 -0.62996300<br>1.35045800    | H 3.58572300 -0.76993600 -<br>0.14799600  |
| H -0.40073600 -1.37001800<br>0.65502400   | H 0.09183200 -0.23157800<br>1.49565100    | O 1.77398200 -0.86297600<br>1.32587200    |
| C 2.38852600 -0.77986700 -<br>0.99011300  | C 1.83487300 1.69629300<br>0.11927000     | H 0.83043300 -0.56413800<br>1.46594400    |
| C -2.38982900 0.77839500<br>0.99039500    | H 2.26118700 2.11273200 -<br>0.80532200   | C 2.38454800 1.52845200<br>0.07713500     |
| H 1.50955800 -1.00498200 -<br>1.61351000  | H 0.85546700 2.16024900<br>0.31236400     | H 3.04606200 1.77330200<br>0.92110500     |
| H 3.10867000 -0.18389900 -<br>1.56957600  | H 2.50388400 1.88698600<br>0.97110800     | H 2.76880100 1.96771400 -<br>0.85484800   |
| H 2.85000500 -1.71794300 -<br>0.64905400  | C 3.17363500 -0.90993900 -<br>0.18987600  | H 1.37271500 1.91313800<br>0.27741700     |
| H -3.10955700 0.18131000<br>1.56923100    | H 3.00257400 -1.99331000 -<br>0.26638100  | C -3.26167400 -0.56298800<br>0.40800000   |
| H -1.51135400 1.00409300<br>1.61427400    | H 3.69882600 -0.55951100 -<br>1.09035300  | H -3.72438700 0.08245300<br>1.16705600    |
| H -2.85220700 1.71616500<br>0.64970600    | H 3.76885800 -0.69112300<br>0.70835200    | H -3.84794500 -0.54319700 -<br>0.52072500 |
| H -2.96561000 -0.62721700 -<br>1.12545100 | C -2.50303700 -1.49477300 -<br>0.12444200 | H -3.19073600 -1.59203300<br>0.78663400   |
| H 2.96643600 0.62627900<br>1.12488300     | H -1.53589000 -1.98021600 -<br>0.32674600 | F -1.90131700 1.52326900 -<br>0.51894900  |
|                                           | H -2.94746200 -1.91956000<br>0.78727600   |                                           |
|                                           | H -3.17398500 -1.63785800 -<br>0.98408900 |                                           |
|                                           | H -3.44134000 0.91654000<br>0.16866200    |                                           |

| <b>HMe-MeCl</b>                           | <b>HMe-MeBr</b>                           | <b>2Me-2Me</b>                            |
|-------------------------------------------|-------------------------------------------|-------------------------------------------|
| P 1.41829700 -0.37602000 -<br>0.09812000  | P 1.01183500 -0.89220400 -<br>0.10011700  | P 1.90330000 -0.03084200<br>0.07356300    |
| O 0.52024500 -0.66484400 -<br>1.30063200  | O 0.07581400 -1.04331200 -<br>1.30067800  | O 1.04019100 -0.00061100<br>1.35683100    |
| O 0.90405600 -0.82651900<br>1.35003700    | O 0.42941200 -1.22228400<br>1.35621000    | O 1.35988100 -0.98775400 -<br>1.12768700  |
| H -0.09798600 -0.61596700<br>1.46335900   | H -0.50953800 -0.81251000<br>1.47112900   | H 0.40761800 -0.71242200 -<br>1.32709700  |
| P -2.39347400 -0.14012800<br>0.18979300   | P -2.68357700 0.06284000<br>0.19692900    | P -1.90321900 -0.03088700 -<br>0.07353700 |
| O -1.58122100 -0.26868500<br>1.49534100   | O -1.88956400 -0.17361700<br>1.49888900   | O -1.04006800 -0.00053800 -<br>1.35678500 |
| H -3.76673000 -0.40467900<br>0.38882800   | H -4.07936200 0.04884500<br>0.41412700    | O -1.35974100 -0.98758200<br>1.12776300   |
| O -2.06197800 -1.21367600 -<br>0.98947200 | O -2.56093400 -1.08216000 -<br>0.95478100 | H -0.40736800 -0.71251500<br>1.32696500   |
| H -1.09346200 -1.12638400 -<br>1.22140100 | H -1.59510100 -1.18027700 -<br>1.19401800 | C 3.56550400 -0.68949400<br>0.35190000    |
| C -2.26900500 1.50987600 -<br>0.54403800  | C -2.28053200 1.64630400 -<br>0.58131100  | C 2.06089700 1.63431500 -<br>0.63706200   |
| H -2.91769200 1.57410900 -<br>1.42992200  | H -2.91505200 1.79950400 -<br>1.46648500  | C -2.06144100 1.63425400<br>0.63698200    |
| H -2.55898900 2.26289500<br>0.20322900    | H -2.42952300 2.45699900<br>0.14690100    | C -3.56530000 -0.68984300 -<br>0.35194300 |
| H -1.22034300 1.67119700 -<br>0.83762800  | H -1.22148500 1.61631700 -<br>0.88037900  | H 2.43315000 2.33094900<br>0.12857900     |
| C 3.09672600 -1.01604400 -<br>0.20193700  | C 2.55232300 -1.82109200 -<br>0.18876800  | H 2.73837900 1.61913000 -<br>1.50333500   |
| H 3.56276100 -0.63035300 -<br>1.11890500  | H 3.07599500 -1.54180800 -<br>1.11319100  | H 1.05810900 1.94583400 -<br>0.96747600   |
| H 3.66151800 -0.69528100                  | H 3.16562000 -1.58424100                  | H 3.46918400 -1.71379200                  |

|                                                                                                                                                                                                                                                                                 |                                                                                                                                                                                                                                                                               |                                                                                                                                                                                                                                                                                                                                                                       |
|---------------------------------------------------------------------------------------------------------------------------------------------------------------------------------------------------------------------------------------------------------------------------------|-------------------------------------------------------------------------------------------------------------------------------------------------------------------------------------------------------------------------------------------------------------------------------|-----------------------------------------------------------------------------------------------------------------------------------------------------------------------------------------------------------------------------------------------------------------------------------------------------------------------------------------------------------------------|
| 0.68384700<br>H 3.03616000 -2.11382500 -<br>0.24074100<br>Cl 1.69454500 1.68513600<br>0.04517000                                                                                                                                                                                | 0.69123300<br>H 2.29891300 -2.89196800 -<br>0.20366900<br>Br 1.69191700 1.24998000<br>0.01444300                                                                                                                                                                              | 0.73997400<br>H 4.12944600 -0.70238900 -<br>0.59203300<br>H 4.08179400 -0.06543600<br>1.09606900<br>H -2.73912000 1.61888700<br>1.50310800<br>H -1.05886500 1.94623900<br>0.96759000<br>H -2.43382000 2.33065500 -<br>0.12880500<br>H -4.12934800 -0.70271600<br>0.59193700<br>H -4.08156900 -0.06585500 -<br>1.09617700<br>H -3.46887100 -1.71416000 -<br>0.73992600 |
| <b>2Me-MeF</b><br>P 1.94810200 -0.00159000 -<br>0.05290700<br>O 1.02693700 0.43478200 -<br>1.18795600<br>O 1.32831800 -0.06883000<br>1.41478700<br>H 0.30235600 -0.23751400<br>1.39526800<br>P -1.97328000 -0.01860900<br>0.07452800<br>O -1.16292500 -0.46813100<br>1.31345500 | <b>2Me-MeCl</b><br>P 1.71666000 0.36792100 -<br>0.04823400<br>O 0.81288600 0.60578600 -<br>1.26088000<br>O 1.08079700 0.61536100<br>1.39976900<br>H 0.09865100 0.26784600<br>1.43037400<br>P -2.13115500 -0.04785900<br>0.07513800<br>O -1.29295800 -0.23854300<br>1.36250600 | <b>2Me-MeBr</b><br>P 1.26423800 0.84673400 -<br>0.04919500<br>O 0.34448300 0.96334500 -<br>1.26958900<br>O 0.59658100 1.03689800<br>1.39501300<br>H -0.31710100 0.53527000<br>1.43443400<br>P -2.45995100 -0.13934900<br>0.07510500<br>O -1.60256200 -0.19592400<br>1.36298600                                                                                        |

|                                           |                                           |                                           |
|-------------------------------------------|-------------------------------------------|-------------------------------------------|
| O -1.42869900 -0.55376400 -<br>1.36868500 | O -1.50564200 -0.69223200 -<br>1.28846700 | O -1.74343400 -0.68296700 -<br>1.28768100 |
| H -0.47585300 -0.26629000 -<br>1.46202900 | H -0.59626000 -0.30001700 -<br>1.42771700 | H -0.90772200 -0.15309100 -<br>1.43198700 |
| C -2.04452300 1.79069100 -<br>0.05692400  | Cl 2.35629400 -1.60706600 -<br>0.03983900 | Br 2.19415900 -1.19149100 -<br>0.01449800 |
| H -2.43728800 2.21313800<br>0.87961000    | C -2.40932100 1.70967200 -<br>0.28361400  | C -3.90505200 -1.21650500<br>0.18479100   |
| H -1.01810500 2.15205300 -<br>0.22237900  | H -2.86713900 2.19636400<br>0.59007200    | H -3.55331000 -2.24399200<br>0.35622700   |
| H -2.67630600 2.08658200 -<br>0.90724700  | H -1.42798300 2.16525000 -<br>0.48648100  | H -4.52890900 -0.89808900<br>1.03252800   |
| F 2.50406600 -1.50598500 -<br>0.32964700  | H -3.05315500 1.82153700 -<br>1.16828100  | H -4.48024500 -1.17191200 -<br>0.75113800 |
| C -3.65723700 -0.67101900<br>0.09786800   | C -3.72550100 -0.88918300<br>0.18146100   | C -3.00403700 1.55394000 -<br>0.28727900  |
| H -3.59925500 -1.76848700<br>0.12869900   | H -3.53736500 -1.95922700<br>0.34994500   | H -3.53071400 1.96680800<br>0.58562300    |
| H -4.17302100 -0.30745000<br>0.99844100   | H -4.29344200 -0.48046100<br>1.02977100   | H -2.10387600 2.15376500 -<br>0.49163000  |
| H -4.19681500 -0.35270500 -<br>0.80568400 | H -4.28611900 -0.75338600 -<br>0.75454200 | H -3.65755600 1.56391600 -<br>1.17187400  |
| C 3.47936300 0.92298700<br>0.10329100     | C 3.25368800 1.30596600 -<br>0.04178000   | C 2.67797400 1.96458400 -<br>0.04754000   |
| H 4.03211300 0.85717800 -<br>0.84378100   | H 3.81176000 1.07060700 -<br>0.95829200   | H 3.26156400 1.79081300 -<br>0.96193800   |
| H 3.23344200 1.97168300<br>0.31969300     | H 2.99854800 2.37566300 -<br>0.01776100   | H 2.29475500 2.99597500 -<br>0.03099100   |
| H 4.07515600 0.50025000<br>0.92370400     | H 3.83907400 1.03333100<br>0.84678800     | H 3.28939700 1.76902600<br>0.84387000     |



| <b>MeF-MeF</b>                            | <b>MeF-MeCl</b>                           | <b>MeF-MeBr</b>                            |
|-------------------------------------------|-------------------------------------------|--------------------------------------------|
| P 2.04566800 0.06552400 -<br>0.02815800   | P -1.81789900 -0.36381000<br>0.07261100   | P 2.50378900 -0.05619000 -<br>0.06491100   |
| O 1.17217800 1.30052500 -<br>0.20745300   | O -0.95240800 -0.62651600<br>1.30573200   | O 1.59643700 0.02809400 -<br>1.28614100    |
| O 1.40493900 -1.35645200 -<br>0.38577100  | O -1.18483400 -0.70913200 -<br>1.36283300 | O 1.81632100 -0.07400800<br>1.37987000     |
| H 0.39387200 -1.35647000 -<br>0.29937200  | H -0.20644100 -0.43750900 -<br>1.39374600 | H 0.90361900 0.37359900<br>1.38441600      |
| P -2.04567400 -0.06551600 -<br>0.02820200 | P 2.19242900 0.00077400 -<br>0.06495800   | P -1.39437800 0.85273200<br>0.07309100     |
| O -1.17222400 -1.30046500 -<br>0.20805900 | O 1.28505100 0.04503900 -<br>1.28822800   | O -0.50829200 1.05530500<br>1.30501500     |
| O -1.40497100 1.35657800 -<br>0.38539000  | O 1.51240400 0.14726400<br>1.37592500     | O -0.73637700 1.13197500 -<br>1.36758900   |
| H -0.39391600 1.35660300 -<br>0.29887100  | H 0.54212100 -0.15572800<br>1.38079900    | H 0.19519500 0.72819000 -<br>1.40598000    |
| C 3.63222600 0.09973000 -<br>0.86252400   | C 3.55686900 1.16352500 -<br>0.06988400   | C -2.91344600 1.81748300<br>0.05887800     |
| H 3.45519000 0.16744900 -<br>1.94465800   | H 4.16691700 0.98990100 -<br>0.96678800   | H -3.48819200 1.57605800<br>0.96334300     |
| H 4.19302400 0.97996300 -<br>0.51979500   | H 3.14434900 2.18159800 -<br>0.08925900   | H -2.63656700 2.88246100<br>0.05628100     |
| H 4.18410600 -0.82033700 -<br>0.62670500  | H 4.15952500 1.01722900<br>0.83683400     | H -3.48838900 1.56747300 -<br>0.84306300   |
| C -3.63233100 -0.09938700 -<br>0.86239000 | C -3.41416200 -1.19102300<br>0.06756100   | F 3.49678800 1.22837400 -<br>0.01148400    |
| H -3.45542600 -0.16670100 -<br>1.94457100 | H -3.23230700 -2.27575000<br>0.08233300   | Br -2.08919300 -1.27286400 -<br>0.00724400 |
| H -4.19309700 -0.97974400 -<br>0.51992700 | H -3.96866600 -0.88724400<br>0.96582900   | C 3.66474500 -1.42209700 -<br>0.05783200   |
| H -4.18417300 0.82059600 -                | H -3.96395500 -0.90686400 -               | H 3.09373200 -2.36073400 -                 |

|                                                                                                                                                                                                                                                                                                                                                                                                                                                                                                                                                            |                                                                                                                                                                                                                                                                                                                                                                                                                                                                                                                                                   |                                                                                                                                                                                                                                                                                                                                                                                                                                                                                                                                                             |
|------------------------------------------------------------------------------------------------------------------------------------------------------------------------------------------------------------------------------------------------------------------------------------------------------------------------------------------------------------------------------------------------------------------------------------------------------------------------------------------------------------------------------------------------------------|---------------------------------------------------------------------------------------------------------------------------------------------------------------------------------------------------------------------------------------------------------------------------------------------------------------------------------------------------------------------------------------------------------------------------------------------------------------------------------------------------------------------------------------------------|-------------------------------------------------------------------------------------------------------------------------------------------------------------------------------------------------------------------------------------------------------------------------------------------------------------------------------------------------------------------------------------------------------------------------------------------------------------------------------------------------------------------------------------------------------------|
| 0.62615700<br>F 2.49306900 -0.08262700<br>1.52598300<br>F -2.49287300 0.08206900<br>1.52605300                                                                                                                                                                                                                                                                                                                                                                                                                                                             | 0.83990400<br>Cl -2.30076400 1.65024900 -<br>0.02383700<br>F 2.96839500 -1.42473100<br>0.00928000                                                                                                                                                                                                                                                                                                                                                                                                                                                 | 0.06119100<br>H 4.28912600 -1.36096600 -<br>0.95956700<br>H 4.28846300 -1.36255300<br>0.84442900                                                                                                                                                                                                                                                                                                                                                                                                                                                            |
| <b>MeCl-MeCl</b><br>P 1.96575100 -0.38872800 -<br>0.09244600<br>O 1.15631600 -0.74603200 -<br>1.33970800<br>O 1.42723900 -0.92742500<br>1.32242900<br>H 0.41557300 -0.85333400<br>1.38072600<br>P -1.96574600 -0.38873100<br>0.09244600<br>O -1.15630900 -0.74602600<br>1.33970800<br>O -1.42722800 -0.92742200 -<br>1.32242800<br>H -0.41556000 -0.85333500 -<br>1.38071700<br>C 3.69207200 -0.89075300 -<br>0.12977200<br>H 3.72373100 -1.98794100 -<br>0.20101900<br>H 4.16838300 -0.43978800 -<br>1.01093100<br>H 4.18536300 -0.55174000<br>0.79123700 | <b>MeCl-MeBr</b><br>P 2.25180100 -0.46468400 -<br>0.06775000<br>O 1.34130200 -0.46139200 -<br>1.29719500<br>O 1.55350000 -0.57832000<br>1.37483400<br>H 0.71290800 -0.00678800<br>1.41641500<br>P -1.46567900 0.86476000<br>0.07596500<br>O -0.56179900 0.90775300<br>1.31155800<br>O -0.76695600 1.02979800 -<br>1.36341700<br>H 0.07756200 0.46433700 -<br>1.41173100<br>C -2.78990700 2.08351000<br>0.06220200<br>H -3.39982200 1.94592700<br>0.96540300<br>H -2.32834200 3.08240500<br>0.06269000<br>H -3.39867200 1.94173500 -<br>0.84103300 | <b>MeBr-MeBr</b><br>P 1.96084800 -0.85124300 -<br>0.15435500<br>O 1.10734800 -1.15391200 -<br>1.38879500<br>O 1.46261400 -1.44138400<br>1.25684700<br>H 0.45803000 -1.32989100<br>1.36243600<br>P -1.96088500 -0.85122500<br>0.15435700<br>O -1.10740000 -1.15392900<br>1.38879800<br>O -1.46266600 -1.44138600 -<br>1.25684300<br>H -0.45808300 -1.32989200 -<br>1.36243300<br>Br -2.08851400 1.35941800 -<br>0.14709600<br>Br 2.08857000 1.35939600<br>0.14709700<br>C 3.67867200 -1.37781500 -<br>0.26543800<br>H 3.69059600 -2.47276100 -<br>0.37379100 |

|                                           |                                            |                                           |
|-------------------------------------------|--------------------------------------------|-------------------------------------------|
| C -3.69206400 -0.89077100<br>0.12977000   | Br -2.52286200 -1.10362400 -<br>0.01043100 | H 4.13255100 -0.90319300 -<br>1.14603800  |
| H -3.72371300 -1.98795900<br>0.20101900   | C 3.50659700 -1.75234800 -<br>0.05485300   | H 4.20496400 -1.07596400<br>0.65029800    |
| H -4.16838000 -0.43980900<br>1.01092800   | H 2.99169900 -2.72434900 -<br>0.05311000   | C -3.67873000 -1.37772900<br>0.26543000   |
| H -4.18535600 -0.55176400 -<br>0.79124000 | H 4.12152300 -1.65079300 -<br>0.95940100   | H -3.69069800 -2.47267500<br>0.37377500   |
| Cl 2.05177600 1.67035300<br>0.11385600    | H 4.12490600 -1.64451900<br>0.84653400     | H -4.13259600 -0.90309400<br>1.14602900   |
| Cl -2.05179400 1.67035000 -<br>0.11385700 | Cl 3.33988500 1.29694500 -<br>0.00201400   | H -4.20500300 -1.07585200 -<br>0.65030800 |

**Cartesian coordinates of various hydrogen bonded phosphinic acid dimers considered in the present investigation at B3LYP-D3/aug-cc-pVDZ level of theory. For the sake of convenience, the different possible dimers formed by different combinations of the monomeric units will be labelled with respect to only the R groups as  $R_1R_2$  in the rest of the manuscript, i.e., dimer formed by combination of PA-2H and PA-BrCl will be labelled as (2H-BrCl) only.**

| <b>2H-2H</b>                           | <b>2H-HF</b>                             | <b>2H-HCl</b>                           |
|----------------------------------------|------------------------------------------|-----------------------------------------|
| P 1.98871100 0.05999100<br>0.14867600  | P 1.71114900 -0.04193500 -<br>0.32163100 | P -1.38384300 0.19200400<br>0.67684500  |
| O 1.13786300 1.33237100<br>0.22151600  | O 0.80453700 -1.22075700 -<br>0.60424600 | O -0.48678100 -0.91275800<br>1.21177400 |
| H 2.41242800 -0.34668800<br>1.44653800 | H 2.79591000 0.09761400 -<br>1.20923300  | H -2.44122100 0.55655800<br>1.53784300  |
| H 3.18770600 0.20912100 -              | O 1.07105100 1.40572500 -                | O -0.71004800 1.58824000                |

|                                                                                                                                                                                                                                                                                                                                                                         |                                                                                                                                                                                                                                                                                                                                                                     |                                                                                                                                                                                                                                                                                                                                                                      |
|-------------------------------------------------------------------------------------------------------------------------------------------------------------------------------------------------------------------------------------------------------------------------------------------------------------------------------------------------------------------------|---------------------------------------------------------------------------------------------------------------------------------------------------------------------------------------------------------------------------------------------------------------------------------------------------------------------------------------------------------------------|----------------------------------------------------------------------------------------------------------------------------------------------------------------------------------------------------------------------------------------------------------------------------------------------------------------------------------------------------------------------|
| 0.59740800<br>O 1.34114900 -1.23968400 -<br>0.55252000<br>H 0.37494600 -1.36734100 -<br>0.27797400<br>P -1.98877500 -0.06002200<br>0.14846100<br>O -1.13792200 -1.33240000<br>0.22131000<br>H -3.18765100 -0.20908900 -<br>0.59782700<br>H -2.41270200 0.34651500<br>1.44629900<br>O -1.34113200 1.23973100 -<br>0.55250800<br>H -0.37496600 1.36737600 -<br>0.27782600 | 0.22441600<br>H 0.06053700 1.40474200 -<br>0.02996500<br>P -2.28015700 0.08211700 -<br>0.05152500<br>O -1.43267200 1.32561600<br>0.24017000<br>H -3.49769900 0.05767800<br>0.67390600<br>H -2.65293700 0.00864900 -<br>1.42406100<br>O -1.65488400 -1.35918300<br>0.32197800<br>H -0.70899400 -1.43152400 -<br>0.00629100<br>F 2.51850600 -0.23509100<br>1.06756700 | 0.30507100<br>H 0.23204400 1.48044300 -<br>0.09175800<br>P 2.48977900 0.01914000 -<br>0.13973700<br>O 1.63270000 1.19069000 -<br>0.63281400<br>H 3.57783000 -0.27202300 -<br>1.00012000<br>H 3.07007200 0.28856900<br>1.13254400<br>O 1.78587000 -1.42907100 -<br>0.01396200<br>H 0.90674800 -1.35939300<br>0.46703200<br>Cl -2.42075900 -0.43259100 -<br>1.00914700 |
| <b>2H-HBr</b><br>P -0.80145800 0.95047000<br>0.54645900<br>O 0.08927300 0.36696600<br>1.63427600<br>H -1.71739800 1.92464600<br>1.00309700<br>O -0.09343000 1.67135900 -<br>0.69013200<br>H 0.75869600 1.18278600 -<br>0.99062900<br>P 2.87453200 -0.29022100 -<br>0.21241400<br>O 2.02664400 0.37872700 -                                                              | <b>2H-2F</b><br>P -1.43039000 -0.08023700<br>0.00590600<br>O -0.54318400 -1.23469200<br>0.37170100<br>O -0.81154800 1.31993000 -<br>0.33610100<br>H 0.22746900 1.34000800 -<br>0.28348000<br>P 2.54398000 0.11689700<br>0.20367300<br>O 1.69943100 1.32706400 -<br>0.21493300<br>H 3.85124000 0.14188700 -                                                          | <b>2H-2Cl</b><br>P 0.96803000 0.07746200 -<br>0.07920700<br>O 0.08394300 -0.22826700 -<br>1.26906900<br>O 0.30644800 0.75783300<br>1.19105900<br>H -0.71595500 0.57635700<br>1.25145400<br>P -2.99310400 -0.03606000<br>0.03544200<br>O -2.17177200 0.28859200<br>1.28977000<br>H -4.25570400 -0.60202400                                                            |

|                                                                                                                                                                                                                                                                                                                                                                                                                                                       |                                                                                                                                                                                                                                                                                                                                                                                                                                                  |                                                                                                                                                                                                                                                                                                                                                                                                                                           |
|-------------------------------------------------------------------------------------------------------------------------------------------------------------------------------------------------------------------------------------------------------------------------------------------------------------------------------------------------------------------------------------------------------------------------------------------------------|--------------------------------------------------------------------------------------------------------------------------------------------------------------------------------------------------------------------------------------------------------------------------------------------------------------------------------------------------------------------------------------------------------------------------------------------------|-------------------------------------------------------------------------------------------------------------------------------------------------------------------------------------------------------------------------------------------------------------------------------------------------------------------------------------------------------------------------------------------------------------------------------------------|
| 1.30034100<br>H 3.78976100 -1.24100200 -<br>0.72945800<br>H 3.66713000 0.65719200<br>0.49629800<br>O 2.10900700 -1.16306900<br>0.91058900<br>H 1.32274500 -0.66094500<br>1.28290500<br>Br -2.17033800 -0.61012600 -<br>0.30814900                                                                                                                                                                                                                     | 0.34102600<br>H 2.71143600 0.05670000<br>1.61554400<br>O 2.03476800 -1.34683400 -<br>0.25488400<br>H 1.06483200 -1.45877900 -<br>0.04953000<br>F -2.41511500 -0.39909300 -<br>1.20732200<br>F -2.53529400 0.21810500<br>1.11621600                                                                                                                                                                                                               | 0.33789000<br>H -3.26174200 1.12870600 -<br>0.73693500<br>O -2.39213000 -1.12902700 -<br>0.99289600<br>H -1.44343200 -0.90711400 -<br>1.21330800<br>Cl 2.51311700 1.33384100 -<br>0.55883100<br>Cl 1.92274700 -1.61584200<br>0.60561300                                                                                                                                                                                                   |
| <b>2H-2Br</b><br>P 0.38286600 -0.13559500 -<br>0.03080800<br>O -0.49022000 -0.41676400 -<br>1.23888400<br>O -0.30133800 -0.15655300<br>1.40390300<br>H -1.32493100 0.01222200<br>1.36091600<br>P -3.60431200 -0.10242400 -<br>0.00848500<br>O -2.79537500 0.22103900<br>1.25373500<br>H -4.88243300 -0.64803500<br>0.27023300<br>H -3.84490000 1.06498500 -<br>0.78577200<br>O -3.00243600 -1.20876100 -<br>1.02108300<br>H -2.04053600 -1.01662700 - | <b>2H-ClF</b><br>P 1.18463100 -0.20931600<br>0.27319700<br>O 0.29301800 0.57778100<br>1.19903100<br>O 0.54105800 -1.28285200 -<br>0.68690400<br>H -0.47870400 -1.13874700 -<br>0.82977100<br>P -2.77440400 -0.08861000 -<br>0.00137400<br>O -1.92746600 -0.88487900 -<br>1.00230900<br>H -4.01277200 0.33324600 -<br>0.54366300<br>H -3.09441100 -0.85948100<br>1.15126800<br>O -2.17288000 1.30924600<br>0.54427300<br>H -1.23328500 1.18259100 | <b>2H-BrF</b><br>P -0.70146000 0.71410500<br>0.22815200<br>O 0.17682900 0.35738500<br>1.40238000<br>O -0.01992200 1.15700800 -<br>1.12748000<br>H 0.93650800 0.76730600 -<br>1.23674100<br>P 3.14438500 -0.17485700 -<br>0.09221800<br>O 2.29890600 0.17771100 -<br>1.32271200<br>H 4.24248700 -1.01347600 -<br>0.40292400<br>H 3.69811600 0.98488700<br>0.51907100<br>O 2.43173500 -1.01162700<br>1.09359900<br>H 1.56115600 -0.59050500 |

|                                                                                                                                                                                                                                                                                                                                                                                                                                                                                                                                                      |                                                                                                                                                                                                                                                                                                                                                                                                                                                                                                                                                                                  |                                                                                                                                                                                                                                                                                                                                                                                                                                                                                                                                                                                |
|------------------------------------------------------------------------------------------------------------------------------------------------------------------------------------------------------------------------------------------------------------------------------------------------------------------------------------------------------------------------------------------------------------------------------------------------------------------------------------------------------------------------------------------------------|----------------------------------------------------------------------------------------------------------------------------------------------------------------------------------------------------------------------------------------------------------------------------------------------------------------------------------------------------------------------------------------------------------------------------------------------------------------------------------------------------------------------------------------------------------------------------------|--------------------------------------------------------------------------------------------------------------------------------------------------------------------------------------------------------------------------------------------------------------------------------------------------------------------------------------------------------------------------------------------------------------------------------------------------------------------------------------------------------------------------------------------------------------------------------|
| 1.21419600<br>Br 2.06589700 -1.57620300<br>0.17559600<br>Br 1.36523600 1.86417600 -<br>0.23063100                                                                                                                                                                                                                                                                                                                                                                                                                                                    | 0.85578500<br>F 2.28593000 -1.05668200<br>1.06878300<br>Cl 2.39112700 0.97881800 -<br>0.87114300                                                                                                                                                                                                                                                                                                                                                                                                                                                                                 | 1.34048700<br>F -1.66676100 1.95358200<br>0.54669300<br>Br -2.18232100 -0.86044800 -<br>0.24530900                                                                                                                                                                                                                                                                                                                                                                                                                                                                             |
| <b>2H-BrCl</b><br>P 0.67731600 0.52980300 -<br>0.08495400<br>O -0.21583500 0.55890500 -<br>1.30873300<br>O 0.01635000 0.83918300<br>1.32622300<br>H -0.98137400 0.55190200<br>1.35934800<br>P -3.25466800 0.13216900<br>0.04995200<br>O -2.40931700 0.12499600<br>1.32989800<br>H -4.46413500 -0.59205300<br>0.18666000<br>H -3.62991300 1.45170200 -<br>0.32889400<br>O -2.62284100 -0.55207400 -<br>1.27161500<br>H -1.69910200 -0.20683600 -<br>1.43111800<br>Br 1.71203300 -1.43875500<br>0.11506400<br>Cl 2.20304200 1.89500500 -<br>0.20108600 | <b>2H-HMe</b><br>P -2.35196200 0.09510600<br>0.22617600<br>O -1.57815800 1.33500000 -<br>0.23481500<br>H -3.68485700 0.05638500 -<br>0.25921900<br>H -2.47194900 0.04647000<br>1.64553900<br>O -1.79847000 -1.34851300 -<br>0.22807500<br>H -0.79249200 -1.41735100 -<br>0.07230600<br>P 1.55117400 -0.08984700 -<br>0.30803100<br>O 0.74048100 -1.29389700<br>0.19492400<br>H 1.60656500 -0.06912600 -<br>1.73204100<br>O 1.00708300 1.37135000<br>0.12261500<br>H 0.00788100 1.44637500 -<br>0.00641700<br>C 3.26576500 -0.08025800<br>0.26543300<br>H 3.78435200 0.79733700 - | <b>2H-2Me</b><br>P 1.39252700 -0.05833500<br>0.06228900<br>O 0.54354300 -1.13697600<br>0.76019200<br>O 0.74945500 0.56431300 -<br>1.29368500<br>H -0.19427500 0.85864400 -<br>1.12561800<br>P -2.55751200 0.07742100<br>0.05529600<br>O -1.69390900 1.19904900 -<br>0.53304200<br>H -2.99436100 0.41167900<br>1.37074300<br>H -3.75678700 -0.16927700 -<br>0.66664200<br>O -1.91831600 -1.39526500<br>0.13934900<br>H -0.92752400 -1.36045100<br>0.40829100<br>C 2.98796200 -0.68981200 -<br>0.52207300<br>C 1.70359500 1.34761000<br>1.17599000<br>H 2.79643000 -1.51112000 - |

|                                                                                                                                                                                                                                                                                                                                                                                                                                                  |                                                                                                                                                                                                                                                                                                                                                                                                                                                   |                                                                                                                                                                                                                                                                                                                                                                                                                                             |
|--------------------------------------------------------------------------------------------------------------------------------------------------------------------------------------------------------------------------------------------------------------------------------------------------------------------------------------------------------------------------------------------------------------------------------------------------|---------------------------------------------------------------------------------------------------------------------------------------------------------------------------------------------------------------------------------------------------------------------------------------------------------------------------------------------------------------------------------------------------------------------------------------------------|---------------------------------------------------------------------------------------------------------------------------------------------------------------------------------------------------------------------------------------------------------------------------------------------------------------------------------------------------------------------------------------------------------------------------------------------|
|                                                                                                                                                                                                                                                                                                                                                                                                                                                  | 0.13994000<br>H 3.26302400 -0.03655700<br>1.36160100<br>H 3.76075700 -1.00160100 -<br>0.06471700                                                                                                                                                                                                                                                                                                                                                  | 1.22268000<br>H 3.54496400 0.10694900 -<br>1.02963400<br>H 3.56160200 -1.06743200<br>0.33306200<br>H 2.15205000 0.98600900<br>2.10944100<br>H 2.36439500 2.07783400<br>0.69315900<br>H 0.73777000 1.82024100<br>1.39446300                                                                                                                                                                                                                  |
| <b>2H-MeF</b><br>P 1.42090400 0.08565900<br>0.01745000<br>O 0.53866500 1.28515400<br>0.31061200<br>O 0.76040400 -1.14732200 -<br>0.74417300<br>H -0.24309700 -1.23997400 -<br>0.58619400<br>P -2.58701900 -0.08412400<br>0.14181600<br>O -1.77223500 -1.29279000 -<br>0.32966600<br>H -3.88348600 -0.01843600 -<br>0.43126600<br>H -2.80265500 -0.11720500<br>1.54939900<br>O -2.01273000 1.38519700 -<br>0.19560800<br>H -1.02450300 1.43940900 | <b>2H-MeCl</b><br>P 1.23199900 -0.37769700<br>0.04332900<br>O 0.35863500 -1.05058500 -<br>1.00625000<br>O 0.57580100 -0.11502300<br>1.47809800<br>H -0.38924500 0.20664200<br>1.41388700<br>P -2.67822200 0.26762300 -<br>0.06089400<br>O -1.86280400 0.65266300<br>1.17749200<br>H -4.04261000 -0.00174500<br>0.22090300<br>H -2.69568800 1.32043800 -<br>1.02007900<br>O -2.24877000 -1.06708100 -<br>0.85908600<br>H -1.24879900 -1.11496000 - | <b>2H-MeBr</b><br>P -0.94117500 0.82272200 -<br>0.03398100<br>O -0.07213400 1.12759200 -<br>1.24691300<br>O -0.28531300 1.04343700<br>1.40989600<br>H 0.65028100 0.64192800<br>1.46597700<br>P 2.75722500 -0.36506900<br>0.05469300<br>O 2.06558900 -0.00745000<br>1.37400600<br>H 4.17306500 -0.33940100<br>0.13745700<br>H 2.42739900 -1.68481200 -<br>0.36714200<br>O 2.49586100 0.59285900 -<br>1.21774200<br>H 1.51920600 0.82098900 - |

|                                                                                                                                                                                                                                                                                                                                                                                                                                              |                                                                                                                                                                                                                                                                                                                                                                                                                                             |                                                                                                                                                                                                                                                                                                                                                                                                                                                |
|----------------------------------------------------------------------------------------------------------------------------------------------------------------------------------------------------------------------------------------------------------------------------------------------------------------------------------------------------------------------------------------------------------------------------------------------|---------------------------------------------------------------------------------------------------------------------------------------------------------------------------------------------------------------------------------------------------------------------------------------------------------------------------------------------------------------------------------------------------------------------------------------------|------------------------------------------------------------------------------------------------------------------------------------------------------------------------------------------------------------------------------------------------------------------------------------------------------------------------------------------------------------------------------------------------------------------------------------------------|
| 0.00215000<br>C 2.96159200 0.42804400 -<br>0.84415600<br>H 2.72261000 0.83761800 -<br>1.83249300<br>H 3.53332300 1.16255100 -<br>0.26575300<br>H 3.53150700 -0.50189200 -<br>0.95014100<br>F 1.95229000 -0.54638800<br>1.41858500                                                                                                                                                                                                            | 0.98299100<br>Cl 1.81931300 1.51017300 -<br>0.64776300<br>C 2.79238100 -1.21236900<br>0.39708300<br>H 2.55602500 -2.20477900<br>0.80075100<br>H 3.35730100 -1.30874900 -<br>0.53628800<br>H 3.35670100 -0.62591300<br>1.12998000                                                                                                                                                                                                            | 1.31489500<br>C -2.50776600 1.71935400<br>0.03264300<br>H -2.27421400 2.78944000<br>0.10270800<br>H -3.06786200 1.51266700 -<br>0.88542700<br>H -3.07183200 1.39165200<br>0.91220800<br>Br -1.53976900 -1.36703500 -<br>0.07721400                                                                                                                                                                                                             |
| <b>HF-HF</b><br>P -2.00569600 -0.06037800<br>0.39489000<br>O -1.09888400 -1.27085900<br>0.44745300<br>H -2.97205800 0.00428800<br>1.41627100<br>O -1.34600600 1.38396400<br>0.36328800<br>H -0.38154100 1.38320300<br>0.04288600<br>P 2.00604500 0.05977500 -<br>0.39464100<br>O 1.09786600 1.26901800 -<br>0.45234400<br>H 2.97430500 -0.00643900 -<br>1.41411200<br>O 1.34801300 -1.38525500 -<br>0.36000200<br>H 0.38259400 -1.38455000 - | <b>HF-HCl</b><br>P -2.18051900 -0.04896300 -<br>0.49130100<br>O -1.27739500 1.14930600 -<br>0.68765600<br>H -2.99248100 -0.36821600 -<br>1.59601200<br>O -1.53126700 -1.43004300 -<br>0.05069600<br>H -0.62184600 -1.33303800<br>0.39438100<br>P 1.67532600 0.10874900<br>0.73163800<br>O 0.77454900 -1.07295200<br>1.05213400<br>H 2.65969800 0.37415300<br>1.70660000<br>O 0.98836200 1.53258500<br>0.50506400<br>H 0.09531600 1.45567300 | <b>HF-HBr</b><br>P -2.54951500 -0.58498900 -<br>0.15772100<br>O -1.67048100 -0.18789900 -<br>1.32364800<br>H -3.19474600 -1.82838000 -<br>0.29626900<br>O -1.91850600 -0.61621100<br>1.29981100<br>H -1.08376000 -0.04424000<br>1.40033100<br>P 1.09961100 1.08879700<br>0.23275200<br>O 0.20149300 0.85311100<br>1.43878100<br>H 1.98205200 2.18266100<br>0.37034000<br>O 0.39629100 1.37058500 -<br>1.17617100<br>H -0.41970600 0.78516500 - |



|                                                                                                                                                                                                                                                                                                                                                                                                                                                                                                                                                       |                                                                                                                                                                                                                                                                                                                                                                                                                                                                                                                                                    |                                                                                                                                                                                                                                                                                                                                                                                                                                                                                                                                                        |
|-------------------------------------------------------------------------------------------------------------------------------------------------------------------------------------------------------------------------------------------------------------------------------------------------------------------------------------------------------------------------------------------------------------------------------------------------------------------------------------------------------------------------------------------------------|----------------------------------------------------------------------------------------------------------------------------------------------------------------------------------------------------------------------------------------------------------------------------------------------------------------------------------------------------------------------------------------------------------------------------------------------------------------------------------------------------------------------------------------------------|--------------------------------------------------------------------------------------------------------------------------------------------------------------------------------------------------------------------------------------------------------------------------------------------------------------------------------------------------------------------------------------------------------------------------------------------------------------------------------------------------------------------------------------------------------|
| 0.04280100<br>F 2.96959900 0.10838900<br>0.90197600<br>F -2.97166600 -0.10441600 -<br>0.90009400                                                                                                                                                                                                                                                                                                                                                                                                                                                      | 0.03002200<br>F -3.31992500 0.24574800<br>0.61644000<br>Cl 2.83162900 -0.26135500 -<br>0.94741000                                                                                                                                                                                                                                                                                                                                                                                                                                                  | 1.31302500<br>F -3.83644000 0.38476500 -<br>0.03136200<br>Br 2.50945500 -0.62506100 -<br>0.08030200                                                                                                                                                                                                                                                                                                                                                                                                                                                    |
| <b>HF-2F</b><br>P 2.33067400 -0.06878600 -<br>0.30406000<br>O 1.40870400 -1.25665600 -<br>0.48101700<br>H 3.42910700 -0.03257200 -<br>1.18225400<br>O 1.70461200 1.39123800 -<br>0.37083000<br>H 0.71282000 1.40744900 -<br>0.19137200<br>P -1.73861200 0.06536000<br>0.05219400<br>O -0.85903800 1.28062400<br>0.08081300<br>O -1.11188200 -1.36423000 -<br>0.13329600<br>H -0.09634400 -1.34620800 -<br>0.26532200<br>F -2.88963600 0.15288900 -<br>1.04478900<br>F -2.66309200 -0.06532000<br>1.34074400<br>F 3.09934500 -0.12729800<br>1.11288900 | <b>HF-2Cl</b><br>P -2.78769100 0.20423400<br>0.07436100<br>O -1.87372200 0.31237600<br>1.27625300<br>H -3.86925100 1.10444500<br>0.06899700<br>O -2.14849400 0.32265800 -<br>1.37628000<br>H -1.15544500 0.13444700 -<br>1.39117000<br>P 1.28580400 -0.08323500 -<br>0.05571900<br>O 0.39919300 -0.16161500 -<br>1.27924400<br>O 0.61513900 -0.28963600<br>1.37108400<br>H -0.38050200 -0.05800400<br>1.36522300<br>Cl 2.28241500 1.71510900<br>0.03414400<br>Cl 2.78868500 -1.46627300 -<br>0.08531800<br>F -3.58647600 -1.19824200<br>0.06182600 | <b>HF-2Br</b><br>P -3.41872300 -0.01305900<br>0.06649600<br>O -2.51509200 0.14656200<br>1.27024300<br>H -4.52619700 0.85467800<br>0.03663800<br>O -2.77709800 0.09530300 -<br>1.38398700<br>H -1.78017900 -0.07383400 -<br>1.39394400<br>P 0.65527200 -0.15797100 -<br>0.04712100<br>O -0.22138600 -0.33778600 -<br>1.27162500<br>O -0.01013100 -0.40448600<br>1.38158100<br>H -1.00980600 -0.19411600<br>1.37547100<br>Br 1.52569000 1.89965200<br>0.01772600<br>Br 2.39599000 -1.52858600 -<br>0.04294000<br>F -4.17618800 -1.43858200<br>0.07930700 |
| <b>HF-ClF</b>                                                                                                                                                                                                                                                                                                                                                                                                                                                                                                                                         | <b>HF-BrF</b>                                                                                                                                                                                                                                                                                                                                                                                                                                                                                                                                      | <b>HF-BrCl</b>                                                                                                                                                                                                                                                                                                                                                                                                                                                                                                                                         |

|                                                                                                                                                                                                                                                                                                                                                                                                                                                                                                                                    |                                                                                                                                                                                                                                                                                                                                                                                                                                                                                                                                      |                                                                                                                                                                                                                                                                                                                                                                                                                                                                                                                                 |
|------------------------------------------------------------------------------------------------------------------------------------------------------------------------------------------------------------------------------------------------------------------------------------------------------------------------------------------------------------------------------------------------------------------------------------------------------------------------------------------------------------------------------------|--------------------------------------------------------------------------------------------------------------------------------------------------------------------------------------------------------------------------------------------------------------------------------------------------------------------------------------------------------------------------------------------------------------------------------------------------------------------------------------------------------------------------------------|---------------------------------------------------------------------------------------------------------------------------------------------------------------------------------------------------------------------------------------------------------------------------------------------------------------------------------------------------------------------------------------------------------------------------------------------------------------------------------------------------------------------------------|
| P -2.55841600 -0.39461200 -<br>0.14021500<br>O -1.62325600 -0.23719800 -<br>1.32041800<br>H -3.54590000 -1.38487700 -<br>0.29467900<br>O -1.92688800 -0.66223700<br>1.29403200<br>H -0.95498400 -0.39745300<br>1.35720200<br>P 1.45637800 0.33604600<br>0.13247000<br>O 0.58067400 0.02593200<br>1.31850900<br>O 0.78287700 0.62374500 -<br>1.26887100<br>H -0.18306300 0.29186900 -<br>1.31850500<br>F -3.49040900 0.90788200<br>0.05569700<br>F 2.35704700 1.63700600<br>0.36190100<br>Cl 2.90275000 -1.06823500 -<br>0.17243400 | P -2.93178900 -0.53783900 -<br>0.07773200<br>O -1.99200600 -0.45636500 -<br>1.26178200<br>H -3.76981900 -1.66804600 -<br>0.06377500<br>O -2.31341200 -0.46514200<br>1.38524000<br>H -1.38607700 -0.06697300<br>1.40811200<br>P 0.95068600 0.70961500<br>0.08667600<br>O 0.08193300 0.54592000<br>1.30898000<br>O 0.26267800 0.75391700 -<br>1.33977200<br>H -0.64217300 0.27976800 -<br>1.34862500<br>F -4.03867700 0.63555500 -<br>0.11553000<br>Br 2.58936400 -0.76717200 -<br>0.00360900<br>F 1.77509400 2.08172900<br>0.10385200 | P -3.27063700 -0.02497500<br>0.06723300<br>O -2.39094100 0.21742800<br>1.27490400<br>H -4.47686800 0.69975800<br>0.05618400<br>O -2.64786500 0.19241700 -<br>1.37892800<br>H -1.63762100 0.15662800 -<br>1.38545200<br>P 0.82297600 0.26504600 -<br>0.04098700<br>O -0.05964800 0.09976300 -<br>1.26074700<br>O 0.16142000 0.06026700<br>1.39231700<br>H -0.85967200 0.11565300<br>1.36435700<br>F -3.84691200 -1.53262300<br>0.04811100<br>Cl 1.68827200 2.13540400<br>0.00805100<br>Br 2.54373900 -1.12926200 -<br>0.04691800 |
| <b>HF-HMe</b><br>P -1.92011600 -0.06007000<br>0.39411100<br>O -0.96325600 -1.22576500<br>0.53464000<br>O -1.32064600 1.39782300<br>0.24798600                                                                                                                                                                                                                                                                                                                                                                                      | <b>HF-2Me</b><br>P -2.25945700 -0.11327300<br>0.24723600<br>O -1.36695600 -1.32900200<br>0.10073200<br>H -3.32539700 -0.27225600<br>1.15583800                                                                                                                                                                                                                                                                                                                                                                                       | <b>HF-MeF</b><br>P -2.33620300 -0.06305000<br>0.31443300<br>O -1.45857800 -1.28200000<br>0.49661100<br>H -3.46361000 -0.00666300<br>1.15667100                                                                                                                                                                                                                                                                                                                                                                                  |

|                                                                                                                                                                                                                                                                                                                                                                                                                                                                                                                                 |                                                                                                                                                                                                                                                                                                                                                                                                                                                                                                                                                                                                                                                              |                                                                                                                                                                                                                                                                                                                                                                                                                                                                                                                        |
|---------------------------------------------------------------------------------------------------------------------------------------------------------------------------------------------------------------------------------------------------------------------------------------------------------------------------------------------------------------------------------------------------------------------------------------------------------------------------------------------------------------------------------|--------------------------------------------------------------------------------------------------------------------------------------------------------------------------------------------------------------------------------------------------------------------------------------------------------------------------------------------------------------------------------------------------------------------------------------------------------------------------------------------------------------------------------------------------------------------------------------------------------------------------------------------------------------|------------------------------------------------------------------------------------------------------------------------------------------------------------------------------------------------------------------------------------------------------------------------------------------------------------------------------------------------------------------------------------------------------------------------------------------------------------------------------------------------------------------------|
| H -0.33642500 1.41528500 -<br>0.08963900<br>P 1.95175800 0.11759900 -<br>0.38465600<br>O 1.07235900 1.36731200 -<br>0.54992700<br>H 3.10251900 0.17199800 -<br>1.21019400<br>O 1.30189400 -1.28956700 -<br>0.86317800<br>H 0.42397900 -1.42374700 -<br>0.40766900<br>C 2.52618800 -0.11183300<br>1.32204800<br>H 3.21306600 -0.96577600<br>1.37169000<br>H 3.02426900 0.80269700<br>1.66659400<br>H 1.64751900 -0.31084200<br>1.94934400<br>F -2.89563700 -0.24828300 -<br>0.88484800<br>H -2.88708600 0.03895400<br>1.41437700 | O -1.59693100 1.27279800<br>0.61418200<br>H -0.56962900 1.33423300<br>0.37607200<br>P 1.68088500 0.08310300 -<br>0.04334900<br>O 0.82927400 1.36607500<br>0.04749500<br>O 1.06002900 -1.09346500 -<br>0.97791100<br>H 0.12924600 -1.29900600 -<br>0.68649900<br>C 1.94648500 -0.65698400<br>1.59724500<br>H 2.60081400 -1.53348700<br>1.51725400<br>H 2.38651500 0.08838600<br>2.27086800<br>H 0.96879400 -0.96848700<br>1.98594000<br>C 3.28472800 0.39696100 -<br>0.81912400<br>H 3.10702100 0.81010500 -<br>1.81897500<br>H 3.83973200 1.12611200 -<br>0.21669700<br>H 3.85118100 -0.53845100 -<br>0.89994500<br>F -3.10524300 0.15943800 -<br>1.10911300 | O -1.67452300 1.37484200<br>0.41304800<br>H -0.65789000 1.37165200<br>0.29076500<br>P 1.73124200 0.06814700 -<br>0.02794500<br>O 0.86386400 1.30096900<br>0.15248500<br>O 1.13765400 -1.32186600<br>0.48124700<br>H 0.12749600 -1.35050000<br>0.48081900<br>F -3.07455800 -0.08359700 -<br>1.12422300<br>C 3.39159900 0.17811800<br>0.64831000<br>H 3.89961900 1.03721800<br>0.19573100<br>H 3.31574500 0.31860100<br>1.73279400<br>H 3.93420000 -0.74740000<br>0.42489900<br>F 2.01821600 -0.17716800 -<br>1.60651100 |
| <b>HF-MeCl</b>                                                                                                                                                                                                                                                                                                                                                                                                                                                                                                                  | <b>HF-MeBr</b>                                                                                                                                                                                                                                                                                                                                                                                                                                                                                                                                                                                                                                               | <b>HCl-HCl</b>                                                                                                                                                                                                                                                                                                                                                                                                                                                                                                         |

|                                                                                                                                                                                                                                                                                                                                                                                                                                                                                                                                                                                                                                                                             |                                                                                                                                                                                                                                                                                                                                                                                                                                                                                                                                                                                                                                                                 |                                                                                                                                                                                                                                                                                                                                                                                                                                                                                                                                    |
|-----------------------------------------------------------------------------------------------------------------------------------------------------------------------------------------------------------------------------------------------------------------------------------------------------------------------------------------------------------------------------------------------------------------------------------------------------------------------------------------------------------------------------------------------------------------------------------------------------------------------------------------------------------------------------|-----------------------------------------------------------------------------------------------------------------------------------------------------------------------------------------------------------------------------------------------------------------------------------------------------------------------------------------------------------------------------------------------------------------------------------------------------------------------------------------------------------------------------------------------------------------------------------------------------------------------------------------------------------------|------------------------------------------------------------------------------------------------------------------------------------------------------------------------------------------------------------------------------------------------------------------------------------------------------------------------------------------------------------------------------------------------------------------------------------------------------------------------------------------------------------------------------------|
| P 2.46029500 -0.30802700<br>0.11492700<br>O 1.59259900 -0.38162600<br>1.35195800<br>H 3.67056100 -1.02463400<br>0.19016300<br>O 1.83249100 -0.70484600 -<br>1.28669000<br>H 0.80808000 -0.70705300 -<br>1.30195900<br>P -1.56124200 -0.29199300 -<br>0.06004700<br>O -0.72326200 -0.74571400 -<br>1.24922000<br>O -0.99656000 -0.65777700<br>1.39456700<br>H 0.00541100 -0.54923100<br>1.44853100<br>F 3.04351500 1.18470000 -<br>0.10163100<br>C -3.26243600 -0.88878800 -<br>0.05880100<br>H -3.74994000 -0.55537300 -<br>0.98121600<br>H -3.23315500 -1.98473400 -<br>0.01979300<br>H -3.78276100 -0.48794300<br>0.81769000<br>Cl -1.74326300 1.78617000 -<br>0.07345600 | P -2.72385800 0.24303700<br>0.10304100<br>O -1.88960700 0.49663000<br>1.33914000<br>H -4.03051200 0.76705000<br>0.14622700<br>O -2.15295100 0.67830000 -<br>1.31166700<br>H -1.14123700 0.83620200 -<br>1.32680300<br>P 1.24220800 0.77141100 -<br>0.06425100<br>O 0.36971000 1.10750100 -<br>1.26977100<br>O 0.63708300 1.13401100<br>1.37734600<br>H -0.34049400 0.89293800<br>1.44100400<br>F -3.06831200 -1.32885400 -<br>0.05747900<br>Br 1.64799900 -1.44793300 -<br>0.00549400<br>C 2.87609400 1.53914700 -<br>0.07739900<br>H 3.39909700 1.22995000 -<br>0.98856300<br>H 2.73265400 2.62709500 -<br>0.07070800<br>H 3.42895500 1.21879800<br>0.81205700 | P 1.83753800 0.72795300 -<br>0.34043700<br>O 0.94193100 0.22335700 -<br>1.46016400<br>H 2.67783600 1.80127300 -<br>0.70373900<br>O 1.14081200 1.24672600<br>0.99991800<br>H 0.32019400 0.70208400<br>1.24648100<br>P -1.83757700 -0.72781700<br>0.34052600<br>O -0.94207300 -0.22319500<br>1.46032600<br>H -2.67821600 -1.80084700<br>0.70388600<br>O -1.14067800 -1.24713400 -<br>0.99954200<br>H -0.32011600 -0.70252700 -<br>1.24622500<br>Cl -3.21272100 0.71256100 -<br>0.23094200<br>Cl 3.21322700 -0.71219800<br>0.23037000 |
| <b>HCl-HBr</b>                                                                                                                                                                                                                                                                                                                                                                                                                                                                                                                                                                                                                                                              | <b>HCl-2F</b>                                                                                                                                                                                                                                                                                                                                                                                                                                                                                                                                                                                                                                                   | <b>HCl-2Cl</b>                                                                                                                                                                                                                                                                                                                                                                                                                                                                                                                     |

|                                                                                                                                                                                                                                                                                                                                                                                                                                                                                                                                   |                                                                                                                                                                                                                                                                                                                                                                                                                                                                                                                                        |                                                                                                                                                                                                                                                                                                                                                                                                                                                                                                                                  |
|-----------------------------------------------------------------------------------------------------------------------------------------------------------------------------------------------------------------------------------------------------------------------------------------------------------------------------------------------------------------------------------------------------------------------------------------------------------------------------------------------------------------------------------|----------------------------------------------------------------------------------------------------------------------------------------------------------------------------------------------------------------------------------------------------------------------------------------------------------------------------------------------------------------------------------------------------------------------------------------------------------------------------------------------------------------------------------------|----------------------------------------------------------------------------------------------------------------------------------------------------------------------------------------------------------------------------------------------------------------------------------------------------------------------------------------------------------------------------------------------------------------------------------------------------------------------------------------------------------------------------------|
| P -1.25325600 1.07995800<br>0.23479200<br>O -0.36746200 0.74969800<br>1.42779900<br>H -2.01368200 2.26033800<br>0.38598400<br>O -0.54576100 1.29076100 -<br>1.18450100<br>H 0.20225400 0.62275100 -<br>1.34016800<br>P 2.22680900 -0.83684200 -<br>0.19407600<br>O 1.34647200 -0.47089200 -<br>1.37800600<br>H 2.93933000 -2.04462800 -<br>0.34810100<br>O 1.53142400 -1.00335800<br>1.23429500<br>H 0.78299500 -0.33330600<br>1.38307700<br>Br -2.83954200 -0.47545200 -<br>0.05883100<br>Cl 3.76159400 0.53232100<br>0.05448500 | P 2.02870000 -0.64893000<br>0.15562700<br>O 1.11652700 -0.67165200<br>1.37281700<br>H 3.15867100 -1.48549300<br>0.26203300<br>O 1.39723100 -1.06735100 -<br>1.25321800<br>H 0.45371700 -0.73346600 -<br>1.35416500<br>P -1.93351700 0.07616600 -<br>0.08121400<br>O -1.04965800 -0.13732200 -<br>1.27452700<br>O -1.34635400 -0.02635000<br>1.37304500<br>H -0.35119900 -0.27544500<br>1.39605500<br>F -3.21400400 -0.87106700 -<br>0.07021400<br>F -2.68873200 1.47702600 -<br>0.11225700<br>Cl 2.88336400 1.21287400 -<br>0.10890200 | P -2.46997700 0.76880200<br>0.18835900<br>O -1.58320000 0.72456600<br>1.42268900<br>H -3.61976100 1.57480000<br>0.32132200<br>O -1.82067400 1.28790900 -<br>1.17770800<br>H -0.87605000 0.95457300 -<br>1.29292700<br>P 1.49291000 0.07531300 -<br>0.05485600<br>O 0.60696700 0.34103200 -<br>1.25199100<br>O 0.96893300 0.51148500<br>1.38120600<br>H -0.05110100 0.58399400<br>1.42156400<br>Cl 3.31754800 0.98930600 -<br>0.19408100<br>Cl 1.96283700 -1.92142100<br>0.08569700<br>Cl -3.28679400 -1.08788000 -<br>0.21047500 |
| <b>HCl-2Br</b><br>P 3.14978800 0.47617200 -<br>0.07670400<br>O 2.25422200 0.62366900 -<br>1.29697200<br>H 4.27839800 1.32183700 -<br>0.07857300                                                                                                                                                                                                                                                                                                                                                                                   | <b>HCl-ClF</b><br>P 1.65240900 0.36549700 -<br>0.10324300<br>O 0.78235000 0.07189700 -<br>1.29744100<br>O 0.98962100 0.47004300<br>1.32838900                                                                                                                                                                                                                                                                                                                                                                                          | <b>HCl-BrF</b><br>P 1.14401700 0.70993100 -<br>0.10780000<br>O 0.27930100 0.42502600 -<br>1.31060100<br>O 0.47045200 0.75624900<br>1.32546700                                                                                                                                                                                                                                                                                                                                                                                    |

|                                                                                                                                                                                                                                                                                                                                                                                                 |                                                                                                                                                                                                                                                                                                                                                                                                     |                                                                                                                                                                                                                                                                                                                                                                                                      |
|-------------------------------------------------------------------------------------------------------------------------------------------------------------------------------------------------------------------------------------------------------------------------------------------------------------------------------------------------------------------------------------------------|-----------------------------------------------------------------------------------------------------------------------------------------------------------------------------------------------------------------------------------------------------------------------------------------------------------------------------------------------------------------------------------------------------|------------------------------------------------------------------------------------------------------------------------------------------------------------------------------------------------------------------------------------------------------------------------------------------------------------------------------------------------------------------------------------------------------|
| O 2.50015900 0.74212900<br>1.36036900<br>H 1.55285600 0.39900400<br>1.41351900<br>P -0.83391600 -0.11468000<br>0.04587300<br>O 0.06357400 -0.18169200<br>1.26658600<br>O -0.14963000 -0.26983000 -<br>1.38670600<br>H 0.81224200 0.07988800 -<br>1.39087600<br>Cl 4.01273400 -1.40081200<br>0.00377200<br>Br -1.96714100 1.81136700 -<br>0.01016400<br>Br -2.37980700 -1.70279400<br>0.04464700 | H 0.06665400 0.02729300<br>1.37344700<br>P -2.22428700 -0.73468700<br>0.15564300<br>O -1.30189400 -0.65776600<br>1.36283200<br>O -1.56476200 -1.07618200 -<br>1.26081000<br>H -0.65664100 -0.65265800 -<br>1.36273100<br>Cl -3.28696000 1.01977400 -<br>0.09531100<br>F 2.41672100 1.76374800 -<br>0.23631300<br>H -3.25260100 -1.69257300<br>0.27123800<br>Cl 3.23570300 -0.91024800<br>0.05902600 | H -0.38618200 0.19790500<br>1.37254300<br>P -2.57332600 -0.82287200<br>0.13846600<br>O -1.65833500 -0.66389900<br>1.34310200<br>O -1.88867200 -1.03527700 -<br>1.29154200<br>H -1.04825100 -0.48876100 -<br>1.38990900<br>Br 2.90268900 -0.62031400<br>0.02086900<br>Cl -3.85539200 0.78682700 -<br>0.05329300<br>F 1.84912800 2.14473800 -<br>0.19209900<br>H -3.46886700 -1.90832100<br>0.22869400 |
| <b>HCl-BrCl</b><br>P -2.83563500 -1.07082800<br>0.16313400<br>O -1.92475400 -0.99689000<br>1.37873600<br>O -2.14975000 -1.23426000 -<br>1.27238700<br>H -1.29157700 -0.70832900 -<br>1.34231400<br>P 0.94527600 0.27983000 -<br>0.00520100<br>O 0.05243700 0.16389200 -<br>1.22358400                                                                                                           | <b>HCl-HMe</b><br>P -1.56864400 0.60223200<br>0.45827300<br>O -0.63514100 -0.05828600<br>1.46085700<br>H -2.49034500 1.51005700<br>1.02423600<br>O -0.91416100 1.42448900 -<br>0.73668900<br>H -0.02495200 1.00197700 -<br>1.07143000<br>P 2.13048600 -0.36732200 -<br>0.39117300                                                                                                                   | <b>HCl-2Me</b><br>P 1.93986400 0.65973000 -<br>0.07267700<br>O 1.05332100 0.70259200 -<br>1.30809000<br>H 2.97638400 1.61922300 -<br>0.06525400<br>O 1.24804400 0.82580900<br>1.34619100<br>H 0.28835500 0.38749800<br>1.38609900<br>P -1.89817500 -0.13600600<br>0.07647700                                                                                                                         |

|                                                                                                                                                                                                                                                               |                                                                                                                                                                                                                                                                                                                                                                                           |                                                                                                                                                                                                                                                                                                                                                                                                                                                                                                                                            |
|---------------------------------------------------------------------------------------------------------------------------------------------------------------------------------------------------------------------------------------------------------------|-------------------------------------------------------------------------------------------------------------------------------------------------------------------------------------------------------------------------------------------------------------------------------------------------------------------------------------------------------------------------------------------|--------------------------------------------------------------------------------------------------------------------------------------------------------------------------------------------------------------------------------------------------------------------------------------------------------------------------------------------------------------------------------------------------------------------------------------------------------------------------------------------------------------------------------------------|
| O 0.24746400 0.37107700<br>1.42407100<br>H -0.62365000 -0.16385300<br>1.45337100<br>Br 2.39017500 -1.41528600<br>0.10265000<br>Cl 2.11785600 1.95493600 -<br>0.05262000<br>Cl -4.07016400 0.58335100<br>0.04258800<br>H -3.76423000 -2.13168400<br>0.19641900 | O 1.25783100 0.33971500 -<br>1.44080500<br>H 3.15765400 -1.13539500 -<br>0.99383800<br>O 1.39846500 -1.49992900<br>0.51126600<br>H 0.59775500 -1.10671600<br>0.95869000<br>C 2.92555500 0.79532600<br>0.75407400<br>H 3.59543300 0.25153800<br>1.43154500<br>H 3.48346000 1.54766900<br>0.18325300<br>H 2.13498800 1.28697100<br>1.33592400<br>Cl -2.84733000 -0.78988800 -<br>0.40377600 | O -1.02574300 -0.20621100<br>1.34708300<br>O -1.20482900 -0.72473400 -<br>1.27169000<br>H -0.32880100 -0.27541300 -<br>1.42611400<br>C -2.37930300 1.57623600 -<br>0.30560000<br>H -3.04223500 1.59923400 -<br>1.17892200<br>H -2.87680200 2.02192400<br>0.56432200<br>H -1.46362600 2.13772400 -<br>0.52982900<br>C -3.38543400 -1.15452500<br>0.22824000<br>H -3.07492100 -2.18757600<br>0.42411700<br>H -3.98774100 -0.78930700<br>1.06873100<br>H -3.96532400 -1.11194500 -<br>0.70143500<br>Cl 3.03508100 -1.10884800 -<br>0.00425800 |
| <b>HCl-MeF</b><br>P 2.03204300 -0.68401500<br>0.09322100<br>O 1.16259600 -0.83235800<br>1.33034000<br>H 3.18398700 -1.49932400<br>0.08301700                                                                                                                  | <b>HCl-MeCl</b><br>P 2.17188700 -0.71117700<br>0.14578900<br>O 1.30835600 -0.82971500<br>1.39004400<br>H 3.39154500 -1.41876600<br>0.20610700                                                                                                                                                                                                                                             | <b>HCl-MeBr</b><br>P 2.48217900 -0.64948200<br>0.17335200<br>O 1.63848800 -0.88526200<br>1.41433300<br>H 3.79998200 -1.14828700<br>0.25412300                                                                                                                                                                                                                                                                                                                                                                                              |

|                                                                                                                                                                                                                                                                                                                                                                                                                                                                                                                                            |                                                                                                                                                                                                                                                                                                                                                                                                                                                                                                                                               |                                                                                                                                                                                                                                                                                                                                                                                                                                                                                                                                                |
|--------------------------------------------------------------------------------------------------------------------------------------------------------------------------------------------------------------------------------------------------------------------------------------------------------------------------------------------------------------------------------------------------------------------------------------------------------------------------------------------------------------------------------------------|-----------------------------------------------------------------------------------------------------------------------------------------------------------------------------------------------------------------------------------------------------------------------------------------------------------------------------------------------------------------------------------------------------------------------------------------------------------------------------------------------------------------------------------------------|------------------------------------------------------------------------------------------------------------------------------------------------------------------------------------------------------------------------------------------------------------------------------------------------------------------------------------------------------------------------------------------------------------------------------------------------------------------------------------------------------------------------------------------------|
| O 1.36659600 -0.96406300 -<br>1.32876200<br>H 0.39160200 -0.66113600 -<br>1.36849700<br>P -1.92798500 0.08087700 -<br>0.07421600<br>O -1.08534200 -0.22101400 -<br>1.29996900<br>O -1.41565500 -0.48787400<br>1.32543400<br>H -0.41371400 -0.61313300<br>1.36987500<br>C -3.66258300 -0.37257700 -<br>0.18628400<br>H -4.10358800 0.13433600 -<br>1.05200700<br>H -3.72934100 -1.45892000 -<br>0.31653800<br>H -4.17469000 -0.07096100<br>0.73439000<br>F -2.00632900 1.68589300<br>0.15467800<br>Cl 2.86795400 1.21175200 -<br>0.00898900 | O 1.54888500 -1.16760600 -<br>1.24957200<br>H 0.54847500 -0.97120300 -<br>1.32076400<br>P -1.77225900 -0.22975500 -<br>0.09152900<br>O -0.97371500 -0.69404300 -<br>1.30299600<br>O -1.29748200 -0.77951000<br>1.33713700<br>H -0.29167600 -0.80012900<br>1.42472400<br>C -3.53714600 -0.59256900 -<br>0.15911200<br>H -3.95522800 -0.12675600 -<br>1.05794100<br>H -3.65316800 -1.68239500 -<br>0.20780400<br>H -4.02021900 -0.19563900<br>0.74017700<br>Cl -1.67914000 1.84923800<br>0.06082900<br>Cl 2.83875600 1.23569600 -<br>0.11538100 | O 1.95503900 -1.22514200 -<br>1.21768300<br>H 0.93682400 -1.20129100 -<br>1.29935200<br>P -1.46664700 -0.76461100 -<br>0.10351000<br>O -0.61328700 -1.18355300 -<br>1.29614000<br>O -0.94961300 -1.22421600<br>1.34503400<br>H 0.04622600 -1.09797700<br>1.44709200<br>C -3.18253900 -1.32253400 -<br>0.16791100<br>H -3.63961100 -0.93855900 -<br>1.08607300<br>H -3.17546400 -2.41987000 -<br>0.17582600<br>H -3.71403400 -0.94789600<br>0.71330200<br>Cl 2.82669400 1.37492200 -<br>0.12085500<br>Br -1.59600800 1.48692300 -<br>0.00735500 |
| <b>HBr-HBr</b><br>P 1.66201800 -1.08163000<br>0.19466200<br>O 0.79156600 -0.72190900<br>1.39017500<br>H 2.32458900 -2.32329700<br>0.31220100                                                                                                                                                                                                                                                                                                                                                                                               | <b>HBr-2F</b><br>P -1.48326100 1.11690800<br>0.12736500<br>O -0.55718800 1.14506000<br>1.33669700<br>H -2.52500600 2.06795700<br>0.17804500                                                                                                                                                                                                                                                                                                                                                                                                   | <b>HBr-2Cl</b><br>P 1.94311500 1.23289100 -<br>0.20282100<br>O 1.03950800 1.23887900 -<br>1.42834200<br>H 3.04308700 2.11375900 -<br>0.28884700                                                                                                                                                                                                                                                                                                                                                                                                |



|                                                                                                                                                                                                                                                                                                                                                                                                      |                                                                                                                                                                                                                                                                                                                                                                                                   |                                                                                                                                                                                                                                                                                                                                                                                                |
|------------------------------------------------------------------------------------------------------------------------------------------------------------------------------------------------------------------------------------------------------------------------------------------------------------------------------------------------------------------------------------------------------|---------------------------------------------------------------------------------------------------------------------------------------------------------------------------------------------------------------------------------------------------------------------------------------------------------------------------------------------------------------------------------------------------|------------------------------------------------------------------------------------------------------------------------------------------------------------------------------------------------------------------------------------------------------------------------------------------------------------------------------------------------------------------------------------------------|
| O 0.95707200 -1.18991600 -<br>1.23805000<br>H 0.26689400 -0.46006800 -<br>1.38001300<br>P -1.66218800 1.08155200 -<br>0.19502900<br>O -0.79169700 0.72206600 -<br>1.39057300<br>H -2.32535700 2.32289400 -<br>0.31263500<br>O -0.95701100 1.19032300<br>1.23755600<br>H -0.26648800 0.46076600<br>1.37940800<br>Br -3.36844100 -0.35294500<br>0.03346800<br>Br 3.36898100 0.35210200 -<br>0.03341000 | O -0.82980300 1.38391000 -<br>1.31146200<br>H 0.05306400 0.91332500 -<br>1.40585000<br>P 2.31855100 -0.15997400 -<br>0.08006500<br>O 1.45766500 0.10126000 -<br>1.28043200<br>O 1.77628400 0.12555600<br>1.36735000<br>H 0.83194100 0.52794400<br>1.37999300<br>F 3.72525200 0.58499500 -<br>0.14178600<br>F 2.85790400 -1.65641800 -<br>0.01757200<br>Br -2.58483900 -0.82191700 -<br>0.01120900 | O 1.28775300 1.62368400<br>1.20588200<br>H 0.39094800 1.18112300<br>1.32628600<br>P -1.87319400 0.05472500<br>0.05861000<br>O -1.01191600 0.38772700<br>1.25671100<br>O -1.44888500 0.63255300 -<br>1.36016600<br>H -0.45261900 0.86361000 -<br>1.41124800<br>Cl -3.80875600 0.68145300<br>0.27000200<br>Cl -2.04834600 -1.98029300 -<br>0.18083400<br>Br 2.92568200 -0.75732800<br>0.06954600 |
| <b>HBr-2Br</b><br>P -2.62355200 1.01504900<br>0.09137000<br>O -1.71941900 1.07557100<br>1.31540400<br>H -3.67132100 1.96121500<br>0.10031300<br>O -1.94810800 1.25039700 -<br>1.34241800<br>H -1.06040800 0.77759000 -<br>1.41176800<br>P 1.23081300 -0.08867500 -<br>0.04127800                                                                                                                     | <b>HBr-ClF</b><br>P 1.65829200 -1.12762600<br>0.15295400<br>O 0.73704500 -1.03501100<br>1.36273900<br>H 2.61484900 -2.16238800<br>0.23528900<br>O 0.97871800 -1.38532500 -<br>1.27503900<br>H 0.13117200 -0.85261900 -<br>1.37844400<br>P -2.05341200 0.39800900 -<br>0.08488200                                                                                                                  | <b>HBr-BrF</b><br>P 2.00760200 -1.13547900<br>0.15643700<br>O 1.09253200 -0.95770800<br>1.36112500<br>H 2.85211300 -2.26382500<br>0.23469900<br>O 1.31595000 -1.31130900 -<br>1.27831800<br>H 0.52751200 -0.69509800 -<br>1.38464800<br>P -1.55419300 0.69694200 -<br>0.08870700                                                                                                               |

|                                                                                                                                                                                                                                                                                                                                                                                                                   |                                                                                                                                                                                                                                                                                                                                                                                                                    |                                                                                                                                                                                                                                                                                                                                                                                                                    |
|-------------------------------------------------------------------------------------------------------------------------------------------------------------------------------------------------------------------------------------------------------------------------------------------------------------------------------------------------------------------------------------------------------------------|--------------------------------------------------------------------------------------------------------------------------------------------------------------------------------------------------------------------------------------------------------------------------------------------------------------------------------------------------------------------------------------------------------------------|--------------------------------------------------------------------------------------------------------------------------------------------------------------------------------------------------------------------------------------------------------------------------------------------------------------------------------------------------------------------------------------------------------------------|
| O 0.32532000 -0.02947300 -<br>1.25629000<br>O 0.54192900 -0.13693500<br>1.39664000<br>H -0.36363600 0.34019900<br>1.40491100<br>Br 2.63315500 1.65156900<br>0.00019400<br>Br 2.52879900 -1.88549300 -<br>0.04312700<br>Br -3.71879900 -0.93126200 -<br>0.02117900                                                                                                                                                 | O -1.20522400 0.05580800 -<br>1.28178300<br>O -1.41048900 0.34868000<br>1.35871100<br>H -0.54520100 -0.19991400<br>1.39285400<br>Br 2.92464100 0.70225500 -<br>0.05278400<br>Cl -3.78686500 -0.67469100 -<br>0.00551000<br>F -2.63474500 1.88608500 -<br>0.15744600                                                                                                                                                | O -0.71491700 0.34174900 -<br>1.29055200<br>O -0.88742700 0.66647700<br>1.34823400<br>H -0.09143100 0.02516500<br>1.39668500<br>Br 3.45812000 0.55501400 -<br>0.02600900<br>F -2.11857800 2.19346600 -<br>0.16129500<br>Br -3.43287900 -0.45997500<br>0.01997000                                                                                                                                                   |
| <b>HBr-BrCl</b><br>P 2.16330100 -1.11296900<br>0.10482300<br>O 1.25466700 -1.02387000<br>1.32376500<br>H 3.05570700 -2.20660700<br>0.12891400<br>O 1.46666100 -1.25835700 -<br>1.33073100<br>H 0.65876800 -0.66103300 -<br>1.41020000<br>P -1.48569000 0.52805400 -<br>0.05803400<br>O -0.59867200 0.34079300 -<br>1.27153800<br>O -0.79730800 0.51914900<br>1.37865200<br>H 0.02442300 -0.08977700<br>1.40318200 | <b>HBr-HMe</b><br>P 0.97761200 1.04264200 -<br>0.31271300<br>O 0.06952900 0.61461200 -<br>1.45755100<br>O 0.29303900 1.40397500<br>1.08056300<br>H -0.50443000 0.77504000<br>1.30105100<br>P -2.50920100 -0.61013500<br>0.28269200<br>O -1.65815200 -0.15569800<br>1.47955700<br>H -3.40313200 -1.65029800<br>0.63902000<br>O -1.71237400 -1.30828400 -<br>0.94677900<br>H -0.99590800 -0.69589400 -<br>1.27391400 | <b>HBr-2Me</b><br>P 1.36930600 1.07321100 -<br>0.07148700<br>O 0.48740000 1.02518700 -<br>1.31214800<br>H 2.29329300 2.14330800 -<br>0.05651400<br>O 0.65416400 1.16973600<br>1.34486400<br>H -0.22890800 0.59376800<br>1.38909500<br>P -2.31907400 -0.23113200<br>0.07542300<br>O -1.44015600 -0.19200900<br>1.34290400<br>O -1.55580900 -0.69949100 -<br>1.28221900<br>H -0.75229700 -0.13029900 -<br>1.43524700 |

|                                                                                                                                                                                                                                                                                 |                                                                                                                                                                                                                                                                                  |                                                                                                                                                                                                                                                                                                                                                                                                     |
|---------------------------------------------------------------------------------------------------------------------------------------------------------------------------------------------------------------------------------------------------------------------------------|----------------------------------------------------------------------------------------------------------------------------------------------------------------------------------------------------------------------------------------------------------------------------------|-----------------------------------------------------------------------------------------------------------------------------------------------------------------------------------------------------------------------------------------------------------------------------------------------------------------------------------------------------------------------------------------------------|
| Br 3.54090900 0.64378400 -<br>0.01912700<br>Br -3.10325800 -1.00551500<br>0.00722500<br>Cl -2.47492500 2.31866200 -<br>0.08362200                                                                                                                                               | C -3.49869900 0.73869100 -<br>0.42233000<br>H -4.14485600 0.35013300 -<br>1.21911600<br>H -4.09989300 1.20385200<br>0.36841200<br>H -2.80485900 1.47951900 -<br>0.84077200<br>H 1.77287500 2.17784700 -<br>0.59021000<br>Br 2.53947300 -0.51661900<br>0.10905200                 | C -3.03930200 1.40021800 -<br>0.28409400<br>H -3.70107100 1.34000200 -<br>1.15652300<br>H -3.59270400 1.75978300<br>0.59190900<br>H -2.21319100 2.08892000 -<br>0.50160500<br>C -3.64602800 -1.45228200<br>0.21815900<br>H -3.19092400 -2.43294900<br>0.40028500<br>H -4.29037000 -1.18647800<br>1.06476300<br>H -4.23006600 -1.48140500 -<br>0.70942100<br>Br 2.74658800 -0.70630000<br>0.00599200 |
| <b>HBr-MeF</b><br>P -1.50141200 1.14422000<br>0.08558200<br>O -0.62082300 1.24348400<br>1.32204500<br>H -2.57839700 2.05809700<br>0.05988500<br>O -0.81343900 1.35562400 -<br>1.34067100<br>H 0.10701000 0.91728900 -<br>1.38723900<br>P 2.29073800 -0.15739400 -<br>0.07357700 | <b>HBr-MeCl</b><br>P -1.63554200 1.19505900<br>0.16879700<br>O -0.74509600 1.28206000<br>1.39892000<br>H -2.78057600 2.02127200<br>0.21542000<br>O -0.99273800 1.55120400 -<br>1.24972900<br>H -0.03739600 1.20282200 -<br>1.34133500<br>P 2.17241700 0.14909700 -<br>0.11696400 | <b>HBr-MeBr</b><br>P -1.98643600 1.19700600<br>0.23520800<br>O -1.08981800 1.34394800<br>1.45502100<br>H -3.22663500 1.86607300<br>0.33616100<br>O -1.42409400 1.69497800 -<br>1.17483800<br>H -0.43222000 1.48665700 -<br>1.29608000<br>P 1.91015300 0.67757700 -<br>0.14958300                                                                                                                    |

|                                                                                                                                                                                                                                                                                                                                                                                             |                                                                                                                                                                                                                                                                                                                                                                                                |                                                                                                                                                                                                                                                                                                                                                                                              |
|---------------------------------------------------------------------------------------------------------------------------------------------------------------------------------------------------------------------------------------------------------------------------------------------------------------------------------------------------------------------------------------------|------------------------------------------------------------------------------------------------------------------------------------------------------------------------------------------------------------------------------------------------------------------------------------------------------------------------------------------------------------------------------------------------|----------------------------------------------------------------------------------------------------------------------------------------------------------------------------------------------------------------------------------------------------------------------------------------------------------------------------------------------------------------------------------------------|
| O 1.50713700 0.25983600 -<br>1.30446500<br>O 1.87553500 0.50035600<br>1.31949600<br>H 0.90577100 0.78077600<br>1.36466500<br>C 4.07528000 0.01480200 -<br>0.18701700<br>H 4.43062900 -0.56575100 -<br>1.04588300<br>H 4.31290900 1.07528800 -<br>0.33011800<br>H 4.53325200 -0.35285000<br>0.73815300<br>F 2.11385400 -1.75194700<br>0.17374600<br>Br -2.56240200 -0.83125600<br>0.00439700 | O 1.42621900 0.68441000 -<br>1.33228300<br>O 1.82215000 0.81851000<br>1.29680400<br>H 0.83467500 0.99939400<br>1.40349700<br>C 3.97003900 0.23306700 -<br>0.22965500<br>H 4.29065500 -0.32405300 -<br>1.11649600<br>H 4.25030200 1.28956100 -<br>0.32364800<br>H 4.40763000 -0.20023400<br>0.67609200<br>Br -2.54293700 -0.84759500 -<br>0.02845100<br>Cl 1.76521000 -1.88332800<br>0.12221100 | O 1.09228100 1.18227400 -<br>1.33359900<br>O 1.51484000 1.25538600<br>1.29475000<br>H 0.51515800 1.29165700<br>1.42932400<br>C 3.68767400 0.96723600 -<br>0.27938000<br>H 4.05302700 0.48716500 -<br>1.19339100<br>H 3.84494200 2.05215700 -<br>0.32972400<br>H 4.18409300 0.54720900<br>0.60181300<br>Br -2.63012900 -0.93422900 -<br>0.04280400<br>Br 1.70509200 -1.56374000<br>0.02389700 |
| <b>2F-2F</b><br>P -2.04568400 -0.06362500<br>0.00031600<br>O -1.14785700 -1.26592600<br>0.00497500<br>O -1.42677600 1.38420600 -<br>0.00535100<br>H -0.41346900 1.37782600 -<br>0.00161800<br>P 2.04564000 0.06365100<br>0.00005600<br>O 1.14787900 1.26601600<br>0.00464800                                                                                                                | <b>2F-2Cl</b><br>P -2.50198200 -0.10971400<br>0.06547300<br>O -1.61493200 0.08790400<br>1.25951800<br>O -1.87204500 -0.38263000 -<br>1.35064300<br>H -0.85605800 -0.32852100 -<br>1.34717100<br>P 1.58023400 -0.06591700 -<br>0.04975400<br>O 0.68628700 -0.23105700 -<br>1.26032500                                                                                                           | <b>2F-2Br</b><br>P -3.13629900 -0.32504900<br>0.06407100<br>O -2.25802400 -0.14817300<br>1.26750400<br>O -2.49773900 -0.55421800 -<br>1.35591100<br>H -1.48082900 -0.50421600 -<br>1.34570100<br>P 0.93417400 -0.17838200 -<br>0.03658800<br>O 0.05974200 -0.42057100 -<br>1.25321400                                                                                                        |

|                                                                                                                                                                                                                                                                                                                                                                                                               |                                                                                                                                                                                                                                                                                                                                                                                                                |                                                                                                                                                                                                                                                                                                                                                                                                                      |
|---------------------------------------------------------------------------------------------------------------------------------------------------------------------------------------------------------------------------------------------------------------------------------------------------------------------------------------------------------------------------------------------------------------|----------------------------------------------------------------------------------------------------------------------------------------------------------------------------------------------------------------------------------------------------------------------------------------------------------------------------------------------------------------------------------------------------------------|----------------------------------------------------------------------------------------------------------------------------------------------------------------------------------------------------------------------------------------------------------------------------------------------------------------------------------------------------------------------------------------------------------------------|
| O 1.42680000 -1.38419000 -<br>0.00556500<br>H 0.41352300 -1.37789900 -<br>0.00163200<br>F 3.08403900 0.05466400<br>1.20318000<br>F 3.08390500 0.06274800 -<br>1.20318500<br>F -3.08409500 -0.05460200<br>1.20342700<br>F -3.08394800 -0.06281600 -<br>1.20292800                                                                                                                                              | O 0.94238400 -0.32763200<br>1.38703300<br>H -0.05672400 -0.16764500<br>1.38779300<br>Cl 2.40341800 1.81281800<br>0.01618600<br>F -3.51396800 1.09742300 -<br>0.15595400<br>Cl 3.19546800 -1.31001400 -<br>0.08288200<br>F -3.56950500 -1.27366200<br>0.25122800                                                                                                                                                | O 0.31180900 -0.52713600<br>1.39472200<br>H -0.68912100 -0.38616900<br>1.40444100<br>F -4.16029500 0.87646200 -<br>0.13380700<br>F -4.19310900 -1.50416200<br>0.21583500<br>Br 2.79693300 -1.36904500 -<br>0.07616700<br>Br 1.58411700 1.95171600<br>0.06351000                                                                                                                                                      |
| <b>2F-CIF</b><br>P -2.29549400 -0.07221200<br>0.06113600<br>O -1.38729600 -0.22950800<br>1.24544500<br>O -1.70433400 0.34426200 -<br>1.33722500<br>H -0.68908600 0.36390300 -<br>1.34322500<br>P 1.77150400 0.33407800 -<br>0.05327400<br>O 0.86527100 0.35643700 -<br>1.25749600<br>O 1.12331900 0.37368200<br>1.39185900<br>H 0.13946000 0.13573800<br>1.37945900<br>F -3.48404200 0.95512600<br>0.30138000 | <b>2F-BrF</b><br>P -2.72960600 -0.16484800<br>0.06097900<br>O -1.80339300 -0.23688200<br>1.23949400<br>O -2.20361100 0.36323000 -<br>1.32570300<br>H -1.19730200 0.50077500 -<br>1.33675800<br>P 1.25391800 0.71574700 -<br>0.05303500<br>O 0.34781600 0.67129300 -<br>1.25924200<br>O 0.59329100 0.73526400<br>1.39046800<br>H -0.34311500 0.35303800<br>1.38526300<br>F -4.03985600 0.69395600<br>0.32888100 | <b>2F-BrCl</b><br>P -2.97999800 -0.25619900<br>0.06494000<br>O -2.12455300 0.01160300<br>1.26814500<br>O -2.31739000 -0.44462900 -<br>1.34996600<br>H -1.31503600 -0.26852700 -<br>1.34052000<br>P 1.09145400 0.23961100 -<br>0.03914800<br>O 0.19957000 0.02079500 -<br>1.24500200<br>O 0.46422900 -0.03133600<br>1.40284200<br>H -0.54779000 -0.01255000<br>1.38680600<br>F -4.10853800 0.84526600 -<br>0.14630800 |

|                                                                                                                                                                                                                                                                                                                                                                                                                                                                                                                                                  |                                                                                                                                                                                                                                                                                                                                                                                                                                                                                                                                                    |                                                                                                                                                                                                                                                                                                                                                                                                                                                                                                                                                            |
|--------------------------------------------------------------------------------------------------------------------------------------------------------------------------------------------------------------------------------------------------------------------------------------------------------------------------------------------------------------------------------------------------------------------------------------------------------------------------------------------------------------------------------------------------|----------------------------------------------------------------------------------------------------------------------------------------------------------------------------------------------------------------------------------------------------------------------------------------------------------------------------------------------------------------------------------------------------------------------------------------------------------------------------------------------------------------------------------------------------|------------------------------------------------------------------------------------------------------------------------------------------------------------------------------------------------------------------------------------------------------------------------------------------------------------------------------------------------------------------------------------------------------------------------------------------------------------------------------------------------------------------------------------------------------------|
| Cl 3.08487900 -1.21707700 -<br>0.08540400<br>F -3.16655500 -1.37254400 -<br>0.22182200<br>F 2.77615700 1.57532100 -<br>0.01511400                                                                                                                                                                                                                                                                                                                                                                                                                | F -3.42711300 -1.55888300 -<br>0.25640200<br>F 2.16476000 2.03030900 -<br>0.01649300<br>Br 2.78243000 -0.86737200 -<br>0.07681200                                                                                                                                                                                                                                                                                                                                                                                                                  | F -3.92491800 -1.52494200<br>0.22630800<br>Br 2.90506500 -1.02331600 -<br>0.07355100<br>Cl 1.80615200 2.16702100<br>0.01040300                                                                                                                                                                                                                                                                                                                                                                                                                             |
| <b>2F-HMe</b><br>P -1.62660900 -0.08284000 -<br>0.01085100<br>O -0.68614900 -1.16962900 -<br>0.44881100<br>O -1.07260300 1.32016000<br>0.40422300<br>H -0.01807900 1.39941400<br>0.31758600<br>P 2.26303600 0.24374900 -<br>0.14735000<br>O 1.39534400 1.47144600<br>0.18441000<br>H 3.55437700 0.62940700 -<br>0.58084500<br>O 1.77752300 -0.65659800 -<br>1.40877500<br>H 0.84957000 -0.96641700 -<br>1.24757800<br>C 2.46131300 -0.87445100<br>1.26619900<br>H 3.15983100 -1.67979000<br>1.00766700<br>H 2.82866100 -0.30895900<br>2.13116000 | <b>2F-2Me</b><br>P -1.94349100 -0.01126300<br>0.05917000<br>O -1.07418700 0.52380200<br>1.16373500<br>O -1.30350300 -0.65948700 -<br>1.20561900<br>H -0.21449400 -0.73608100 -<br>1.16430200<br>P 1.95898000 -0.04509600 -<br>0.05271000<br>O 1.13556100 -0.83430600 -<br>1.09850100<br>O 1.47779000 -0.24578800<br>1.48714300<br>H 0.51849900 -0.00472700<br>1.56585300<br>C 1.90668100 1.74113600 -<br>0.38106500<br>H 2.23007100 1.93543300 -<br>1.41078500<br>H 0.86904400 2.07425600 -<br>0.25308300<br>H 2.54880200 2.27560400<br>0.32929900 | <b>2F-MeF</b><br>P -2.04209300 0.06190700 -<br>0.01183200<br>O -1.18940600 1.29556300<br>0.03871600<br>O -1.38140900 -1.35950100 -<br>0.08656100<br>H -0.34920400 -1.32859000 -<br>0.15954000<br>P 2.03485500 -0.05914900 -<br>0.01632200<br>O 1.12640000 -1.24527800 -<br>0.29332200<br>O 1.41458500 1.39472000 -<br>0.24100200<br>H 0.41689000 1.41727400 -<br>0.13083400<br>C 3.60727600 -0.07133800 -<br>0.88057700<br>H 4.14380700 -0.99099700 -<br>0.62130000<br>H 3.41019100 -0.04482900 -<br>1.95851000<br>H 4.18920800 0.80765900 -<br>0.58124400 |

|                                                                                                                                                                                                                                                                                                                                                                                                               |                                                                                                                                                                                                                                                                                                                                                                                                                |                                                                                                                                                                                                                                                                                                                                                                                                                      |
|---------------------------------------------------------------------------------------------------------------------------------------------------------------------------------------------------------------------------------------------------------------------------------------------------------------------------------------------------------------------------------------------------------------|----------------------------------------------------------------------------------------------------------------------------------------------------------------------------------------------------------------------------------------------------------------------------------------------------------------------------------------------------------------------------------------------------------------|----------------------------------------------------------------------------------------------------------------------------------------------------------------------------------------------------------------------------------------------------------------------------------------------------------------------------------------------------------------------------------------------------------------------|
| H 1.47639100 -1.30214500<br>1.49498800<br>F -2.78241200 0.21539400 -<br>1.07056500<br>F -2.55649600 -0.54049900<br>1.20442100                                                                                                                                                                                                                                                                                 | F -2.95300100 1.09794700 -<br>0.49675300<br>F -3.03698800 -1.05369500<br>0.58175500<br>C 3.67385400 -0.61107600 -<br>0.01367500<br>H 3.67673700 -1.68164400<br>0.22254900<br>H 4.12670900 -0.45333800 -<br>0.99981400<br>H 4.23145600 -0.06015600<br>0.75300100                                                                                                                                                | F -3.10391900 0.08922600 -<br>1.20131700<br>F -3.07023900 -0.03427300<br>1.20117100<br>F 2.48614600 -0.06138300<br>1.54018500                                                                                                                                                                                                                                                                                        |
| <b>2F-MeCl</b><br>P -2.17876300 0.03890600<br>0.06360900<br>O -1.32655500 0.11825700<br>1.29588500<br>O -1.53297700 0.14767500 -<br>1.36246300<br>H -0.51319300 0.33174800 -<br>1.34298400<br>P 1.83212000 0.33051600 -<br>0.06567300<br>O 0.94086600 0.62107000 -<br>1.26954400<br>O 1.23254000 0.71912800<br>1.37102800<br>H 0.25499300 0.50558600<br>1.43461000<br>C 3.44913900 1.12241000 -<br>0.11989700 | <b>2F-MeBr</b><br>P -2.47457900 0.00926600<br>0.06581100<br>O -1.64057900 0.20399500<br>1.29753200<br>O -1.85887800 0.23043200 -<br>1.36087300<br>H -0.87371400 0.54995300 -<br>1.34343000<br>P 1.45136700 0.80337300 -<br>0.06738900<br>O 0.53321800 1.02717700 -<br>1.26750900<br>O 0.82222300 1.13066600<br>1.37462300<br>H -0.11975800 0.79651600<br>1.44615900<br>C 2.98763600 1.74762200 -<br>0.11628300 | <b>2Cl-2Cl</b><br>P -2.03358000 -0.16012200<br>0.04780200<br>O -1.14811400 -0.11473000<br>1.27479600<br>O -1.37990500 -0.63398600 -<br>1.32515600<br>H -0.38332400 -0.44039100 -<br>1.35239100<br>P 2.03359600 -0.16023800 -<br>0.04780000<br>O 1.14812700 -0.11481600 -<br>1.27479300<br>O 1.37988300 -0.63426100<br>1.32509500<br>H 0.38338400 -0.44029400<br>1.35243300<br>Cl 2.88474200 1.67306800<br>0.31264100 |

|                                                                                                                                                                                                                                                                                                                                                                                                                    |                                                                                                                                                                                                                                                                                                                                                                                                                  |                                                                                                                                                                                                                                                                                                                                                                                                                     |
|--------------------------------------------------------------------------------------------------------------------------------------------------------------------------------------------------------------------------------------------------------------------------------------------------------------------------------------------------------------------------------------------------------------------|------------------------------------------------------------------------------------------------------------------------------------------------------------------------------------------------------------------------------------------------------------------------------------------------------------------------------------------------------------------------------------------------------------------|---------------------------------------------------------------------------------------------------------------------------------------------------------------------------------------------------------------------------------------------------------------------------------------------------------------------------------------------------------------------------------------------------------------------|
| H 3.96811300 0.79458000 -<br>1.02700600<br>H 3.28917500 2.20744000 -<br>0.14470000<br>H 4.01751100 0.83895600<br>0.77245600<br>F -3.36879600 1.10068100<br>0.06052800<br>F -3.06299900 -1.28536800<br>0.00495300<br>Cl 2.24186900 -1.70684000<br>0.03865600                                                                                                                                                        | H 3.53206900 1.47952100 -<br>1.02794000<br>H 2.72305100 2.81255300 -<br>0.12911200<br>H 3.58212600 1.50947700<br>0.77214500<br>F -3.81178000 0.87816600<br>0.07526400<br>F -3.14803400 -1.43331600 -<br>0.00537100<br>Br 2.08622200 -1.35452300<br>0.02444400                                                                                                                                                    | Cl 3.63414000 -1.40978400 -<br>0.25870400<br>Cl -3.63404900 -1.40979000<br>0.25881400<br>Cl -2.88490000 1.67310300 -<br>0.31262000                                                                                                                                                                                                                                                                                  |
| <b>2Cl-2Br</b><br>P -1.33798500 -0.11332600 -<br>0.03879800<br>O -0.46329200 -0.36373000 -<br>1.25321900<br>O -0.70348300 -0.41305200<br>1.39728900<br>H 0.29520100 -0.23566100<br>1.39934900<br>P 2.71727800 -0.12837800<br>0.04459300<br>O 1.83540300 0.07638300<br>1.25719600<br>O 2.07251400 0.09706900 -<br>1.39418700<br>H 1.07102900 -0.07451600 -<br>1.38597700<br>Cl 3.53636400 -2.01367500<br>0.01720400 | <b>2Cl-ClF</b><br>P -2.24932300 0.23811000<br>0.06875700<br>O -1.35896800 0.20555600<br>1.28377900<br>O -1.58945700 0.40280100 -<br>1.36124000<br>H -0.59951400 0.17460300 -<br>1.35616500<br>P 1.82214400 -0.09385600 -<br>0.04287500<br>O 0.90942800 -0.20109800 -<br>1.24575100<br>O 1.17707800 -0.29757800<br>1.39932200<br>H 0.18215300 -0.10525600<br>1.39458900<br>Cl 2.78721000 1.71830200<br>0.01560000 | <b>2Cl-BrF</b><br>P -1.76883100 0.68382200<br>0.07099500<br>O -0.88626400 0.61036900<br>1.29244800<br>O -1.08556700 0.85560100 -<br>1.35092900<br>H -0.14265800 0.48072800 -<br>1.36225900<br>P 2.22178300 -0.11362300 -<br>0.04577700<br>O 1.29408200 -0.13265300 -<br>1.24176700<br>O 1.56754400 -0.20536600<br>1.40379800<br>H 0.60400300 0.10976400<br>1.40100200<br>Br -3.19455100 -0.99237200 -<br>0.06399500 |



|                                                                                                                                                                                                                                                                                                                                                                                                                                                                                                                                                          |                                                                                                                                                                                                                                                                                                                                                                                                                                                                                                                                                        |                                                                                                                                                                                                                                                                                                                                                                                                                                                                                                                                                     |
|----------------------------------------------------------------------------------------------------------------------------------------------------------------------------------------------------------------------------------------------------------------------------------------------------------------------------------------------------------------------------------------------------------------------------------------------------------------------------------------------------------------------------------------------------------|--------------------------------------------------------------------------------------------------------------------------------------------------------------------------------------------------------------------------------------------------------------------------------------------------------------------------------------------------------------------------------------------------------------------------------------------------------------------------------------------------------------------------------------------------------|-----------------------------------------------------------------------------------------------------------------------------------------------------------------------------------------------------------------------------------------------------------------------------------------------------------------------------------------------------------------------------------------------------------------------------------------------------------------------------------------------------------------------------------------------------|
| Br -2.04287500 2.00332500<br>0.01977500<br>Br -3.17062100 -1.35192700 -<br>0.04645900<br>Cl 4.33814700 1.11073300<br>0.03557100                                                                                                                                                                                                                                                                                                                                                                                                                          | F -3.29286700 1.44718400<br>0.11018500<br>Cl -3.51753800 -1.35150200 -<br>0.03323500<br>Cl 3.33949700 -1.45568200 -<br>0.08880400                                                                                                                                                                                                                                                                                                                                                                                                                      | Cl 3.55776900 -1.65468900 -<br>0.06893600<br>Cl 3.40498600 1.56535800 -<br>0.03062900<br>F -2.76197800 1.93699300<br>0.11203300                                                                                                                                                                                                                                                                                                                                                                                                                     |
| <b>2Cl-BrCl</b><br>P -1.68113800 0.48738300<br>0.05242300<br>O -0.78723000 0.63504500<br>1.26740600<br>O -1.02580300 0.73794400 -<br>1.38133900<br>H -0.05822200 0.43513400 -<br>1.39416600<br>P 2.33651000 -0.00309600 -<br>0.04540100<br>O 1.42914600 -0.07504300 -<br>1.25435100<br>O 1.67253300 -0.14282800<br>1.39561100<br>H 0.70139500 0.15524200<br>1.39157200<br>Br -2.62036800 -1.52949500 -<br>0.02295200<br>Cl 3.76626600 -1.45862300 -<br>0.05132900<br>Cl -3.24821800 1.79615500<br>0.07219100<br>Cl 3.41359900 1.74699300 -<br>0.01280400 | <b>2Cl-HMe</b><br>P 1.98610000 0.00622500<br>0.33851700<br>O 1.08905600 1.21687100<br>0.48213600<br>O 1.31974800 -1.42563300<br>0.28358200<br>H 0.29166500 -1.39622500<br>0.03676500<br>P -1.98168700 -0.10640300 -<br>0.05271700<br>O -1.09710200 -1.34043100 -<br>0.30508200<br>H -2.27056100 0.03737100<br>1.33371000<br>O -1.36531700 1.31773500 -<br>0.51550400<br>H -0.42695100 1.41398000 -<br>0.19046900<br>C -3.56387800 -0.18051000 -<br>0.91623900<br>H -4.10404100 -1.08064900 -<br>0.59902500<br>H -4.15013400 0.71741500 -<br>0.68530400 | <b>2Cl-2Me</b><br>P 1.83960500 0.04682600<br>0.43646900<br>O 0.95068200 1.27186700<br>0.36538900<br>O 1.22144200 -1.35701000<br>0.09740000<br>H 0.14237300 -1.33279000 -<br>0.10754700<br>P -2.02030200 -0.03709900 -<br>0.11337300<br>O -1.17850800 -1.31061400 -<br>0.37026800<br>O -1.44884900 1.31048600 -<br>0.82044200<br>H -0.51861200 1.46706100 -<br>0.51154900<br>Cl 3.50527100 0.22744300 -<br>0.76250600<br>Cl 2.65746700 -0.14061300<br>2.32649200<br>C -2.14855600 0.32346500<br>1.66261900<br>H -2.79879000 1.19114600<br>1.82639900 |

|                                                                                                                                                                                                                                                                                                                                                                                                                  |                                                                                                                                                                                                                                                                                                                                                                                                                  |                                                                                                                                                                                                                                                                                                                                                                                                                |
|------------------------------------------------------------------------------------------------------------------------------------------------------------------------------------------------------------------------------------------------------------------------------------------------------------------------------------------------------------------------------------------------------------------|------------------------------------------------------------------------------------------------------------------------------------------------------------------------------------------------------------------------------------------------------------------------------------------------------------------------------------------------------------------------------------------------------------------|----------------------------------------------------------------------------------------------------------------------------------------------------------------------------------------------------------------------------------------------------------------------------------------------------------------------------------------------------------------------------------------------------------------|
|                                                                                                                                                                                                                                                                                                                                                                                                                  | H -3.36582000 -0.22971400 -<br>1.99407400<br>Cl 3.34735400 -0.12708000<br>1.86992400<br>Cl 3.18195600 0.14891400 -<br>1.33760400                                                                                                                                                                                                                                                                                 | H -2.54205300 -0.55471700<br>2.18851300<br>H -1.13995400 0.55122700<br>2.02952100<br>C -3.67154300 -0.19648400 -<br>0.82808600<br>H -3.56435800 -0.37506100 -<br>1.90442100<br>H -4.18247800 -1.04925400 -<br>0.36526600<br>H -4.24122200 0.72508800 -<br>0.65924600                                                                                                                                           |
| <b>2Cl-MeF</b><br>P -1.55666600 0.00297400 -<br>0.06198500<br>O -0.68038800 -0.08097400 -<br>1.29203000<br>O -0.88322200 0.40346500<br>1.31738400<br>H 0.12964900 0.19998300<br>1.33214500<br>P 2.52264700 -0.08268900<br>0.10697100<br>O 1.59170100 -0.12760700<br>1.30682200<br>O 1.90049000 -0.48441400 -<br>1.30702400<br>H 0.90677300 -0.33531700 -<br>1.35570500<br>C 4.04066200 -1.02628500<br>0.27212000 | <b>2Cl-MeCl</b><br>P 1.75090100 -0.03809800 -<br>0.05452600<br>O 0.87652700 -0.05682900 -<br>1.28843200<br>O 1.05551200 -0.14445900<br>1.36738400<br>H 0.06314900 0.14614700<br>1.34654600<br>P -2.26872200 0.31811300<br>0.05816300<br>O -1.36831100 0.58232800<br>1.26081900<br>O -1.64473400 0.64892000 -<br>1.38214100<br>H -0.67446400 0.39302400 -<br>1.43299300<br>Cl 2.92375500 1.65554300<br>0.00837500 | <b>2Cl-MeBr</b><br>P -2.02971100 0.16815800<br>0.05339200<br>O -1.18905600 0.43650800<br>1.28116000<br>O -1.47970700 0.63248200 -<br>1.36027300<br>H -0.46511900 0.82995600 -<br>1.35493500<br>P 1.89875600 0.87249100 -<br>0.10966400<br>O 1.00274900 1.14373000 -<br>1.31549700<br>O 1.29756400 1.27112700<br>1.32600400<br>H 0.34014600 0.98198900<br>1.40877100<br>C 3.50560100 1.69100300 -<br>0.16985200 |

|                                                                                                                                                                                                                                                                                                                                                                                                                      |                                                                                                                                                                                                                                                                                                                                                                                                                      |                                                                                                                                                                                                                                                                                                                                                                                                                       |
|----------------------------------------------------------------------------------------------------------------------------------------------------------------------------------------------------------------------------------------------------------------------------------------------------------------------------------------------------------------------------------------------------------------------|----------------------------------------------------------------------------------------------------------------------------------------------------------------------------------------------------------------------------------------------------------------------------------------------------------------------------------------------------------------------------------------------------------------------|-----------------------------------------------------------------------------------------------------------------------------------------------------------------------------------------------------------------------------------------------------------------------------------------------------------------------------------------------------------------------------------------------------------------------|
| H 4.58634000 -0.66385100<br>1.15062800<br>H 3.77900700 -2.08249200<br>0.40428800<br>H 4.64503100 -0.89752100 -<br>0.63289800<br>Cl -3.07761500 1.35571500 -<br>0.27438600<br>Cl -2.54353500 -1.77479900<br>0.27585600<br>F 3.06993600 1.42702700 -<br>0.11618500                                                                                                                                                     | Cl 3.11894900 -1.56124300 -<br>0.04460400<br>Cl -2.78939500 -1.69648700 -<br>0.01324700<br>C -3.84299100 1.19420000<br>0.09046300<br>H -4.38326100 0.90752900<br>0.99908800<br>H -3.62708700 2.26973500<br>0.10021000<br>H -4.42056800 0.92733200 -<br>0.80108800                                                                                                                                                    | H 4.02696200 1.36890800 -<br>1.07747700<br>H 3.32610300 2.77328300 -<br>0.19688700<br>H 4.07947900 1.41843900<br>0.72222000<br>Cl -2.45123100 -1.83782100 -<br>0.13684200<br>Br 2.36212700 -1.32861200<br>0.02175100<br>Cl -3.88623400 1.02977000<br>0.16866100                                                                                                                                                       |
| <b>2Br-2Br</b><br>P -2.01923900 -0.38701500<br>0.04260100<br>O -1.15120000 -0.41127300<br>1.28676700<br>O -1.37969500 -0.94267400 -<br>1.31248100<br>H -0.38385900 -0.74987100 -<br>1.35690700<br>P 2.01923800 -0.38679000 -<br>0.04253500<br>O 1.15109200 -0.41099300 -<br>1.28662300<br>O 1.37972900 -0.94221200<br>1.31266300<br>H 0.38379600 -0.74980500<br>1.35695700<br>Br 2.71283900 1.68877300<br>0.38853200 | <b>2Br-ClF</b><br>P -1.15836400 -0.22096900 -<br>0.03335700<br>O -0.27577100 -0.50103400 -<br>1.23583800<br>O -0.57073600 -0.58383100<br>1.40832900<br>H 0.43565600 -0.46906400<br>1.43533700<br>P 2.88171200 -0.61801000<br>0.14712800<br>O 2.00149500 -0.27346800<br>1.32090300<br>O 2.21019200 -1.15823000 -<br>1.18117000<br>H 1.22514900 -0.91356800 -<br>1.24170000<br>Br -1.72816300 1.93312200<br>0.03824500 | <b>2Br-BrF</b><br>P -1.56089400 -0.25568500 -<br>0.03160700<br>O -0.67261900 -0.53839800 -<br>1.22907300<br>O -1.07017900 -0.79619800<br>1.39086200<br>H -0.05943200 -0.78625500<br>1.45987800<br>P 2.39757200 -1.04332000<br>0.21747800<br>O 1.52390400 -0.74218800<br>1.41029600<br>O 1.70758200 -1.52612200 -<br>1.12773200<br>H 0.76583500 -1.15873600 -<br>1.22071200<br>Br -1.88604200 1.93770900<br>0.20142000 |

|                                                                                                                                                                                                                                                                                                                                                                                                                                                                                                                                                               |                                                                                                                                                                                                                                                                                                                                                                                                                                                                                                                                                             |                                                                                                                                                                                                                                                                                                                                                                                                                                                                                                                                                          |
|---------------------------------------------------------------------------------------------------------------------------------------------------------------------------------------------------------------------------------------------------------------------------------------------------------------------------------------------------------------------------------------------------------------------------------------------------------------------------------------------------------------------------------------------------------------|-------------------------------------------------------------------------------------------------------------------------------------------------------------------------------------------------------------------------------------------------------------------------------------------------------------------------------------------------------------------------------------------------------------------------------------------------------------------------------------------------------------------------------------------------------------|----------------------------------------------------------------------------------------------------------------------------------------------------------------------------------------------------------------------------------------------------------------------------------------------------------------------------------------------------------------------------------------------------------------------------------------------------------------------------------------------------------------------------------------------------------|
| Br 3.86210500 -1.59715000 -<br>0.24993200<br>Br -3.86232100 -1.59704700<br>0.24978400<br>Br -2.71239800 1.68867500 -<br>0.38858400                                                                                                                                                                                                                                                                                                                                                                                                                            | Br -3.06806700 -1.33844700 -<br>0.08668400<br>Cl 4.12143600 0.91086000 -<br>0.37106100<br>F 3.94591200 -1.76348800<br>0.47870900                                                                                                                                                                                                                                                                                                                                                                                                                            | Br -3.58127400 -1.13888700 -<br>0.22446700<br>F 3.43640300 -2.22962000<br>0.48916800<br>Br 3.75843400 0.62027300 -<br>0.27051100                                                                                                                                                                                                                                                                                                                                                                                                                         |
| <b>2Br-BrCl</b><br>P 1.80045200 -0.08178200<br>0.04037300<br>O 0.95707500 -0.41087100<br>1.25794600<br>O 1.19665200 -0.45146900 -<br>1.39254700<br>H 0.18567700 -0.36651500 -<br>1.39282100<br>P -2.25247500 -0.43918300 -<br>0.03693100<br>O -1.37295100 -0.19373000 -<br>1.24575400<br>O -1.61098100 -0.21512200<br>1.40577300<br>H -0.59686500 -0.28490000<br>1.38462700<br>Br -4.04890600 0.84975200 -<br>0.02080600<br>Cl -2.99604900 -2.36012900 -<br>0.02804000<br>Br 2.28965000 2.09485200 -<br>0.03088900<br>Br 3.74801800 -1.13044100<br>0.05033800 | <b>2Br-HMe</b><br>P 0.61478800 -0.27168200 -<br>0.01173200<br>O -0.21825200 -0.72818300 -<br>1.19327000<br>O 0.07305200 -0.56435300<br>1.44824800<br>H -0.98241300 -0.53074700<br>1.48971500<br>P -3.22145100 -0.54718000<br>0.15749000<br>O -2.42349900 -0.48813100<br>1.47233900<br>H -4.55606500 -0.96660400<br>0.37823000<br>O -2.73412400 -1.65439700 -<br>0.92632400<br>H -1.78451900 -1.48678500 -<br>1.15908100<br>C -3.27740400 1.05427400 -<br>0.69178500<br>H -3.91467900 0.98214900 -<br>1.58163500<br>H -3.66146600 1.81673200 -<br>0.00326000 | <b>2Br-2Me</b><br>P 0.85686300 -0.27011100 -<br>0.03106900<br>O 0.04348800 -0.65969100 -<br>1.25092300<br>O 0.23301500 -0.49892200<br>1.39817200<br>H -0.85589800 -0.43984100<br>1.40087200<br>P -3.00533000 -0.28491100<br>0.05331100<br>O -2.21904000 -0.37894700<br>1.38240900<br>O -2.54599900 -1.34783800 -<br>1.08765000<br>H -1.57601600 -1.24191300 -<br>1.27006200<br>Br 2.83038300 -1.29742900<br>0.05025500<br>Br 1.36355900 1.92469900 -<br>0.15288600<br>C -4.74978000 -0.68846600<br>0.29551200<br>H -4.81376200 -1.70606000<br>0.69840000 |

|                                                                                                                                                                                                                                                                                                                                                                                                                     |                                                                                                                                                                                                                                                                                                                                                                                                                      |                                                                                                                                                                                                                                                                                                                                                                                                                           |
|---------------------------------------------------------------------------------------------------------------------------------------------------------------------------------------------------------------------------------------------------------------------------------------------------------------------------------------------------------------------------------------------------------------------|----------------------------------------------------------------------------------------------------------------------------------------------------------------------------------------------------------------------------------------------------------------------------------------------------------------------------------------------------------------------------------------------------------------------|---------------------------------------------------------------------------------------------------------------------------------------------------------------------------------------------------------------------------------------------------------------------------------------------------------------------------------------------------------------------------------------------------------------------------|
|                                                                                                                                                                                                                                                                                                                                                                                                                     | H -2.25329500 1.31346500 -<br>0.99079800<br>Br 2.66225300 -1.13281800<br>0.00093700<br>Br 0.92077500 1.95458300 -<br>0.13241100                                                                                                                                                                                                                                                                                      | H -5.18510200 0.01686200<br>1.01347000<br>H -5.28230200 -0.63370700 -<br>0.66143300<br>C -2.85769600 1.36925200 -<br>0.68435900<br>H -3.18804800 2.12275800<br>0.04083000<br>H -1.80196800 1.54067900 -<br>0.92949100<br>H -3.45832600 1.42984400 -<br>1.59984300                                                                                                                                                         |
| <b>2Br-MeF</b><br>P -0.92324600 -0.17930600 -<br>0.04813800<br>O -0.05092300 -0.40583100 -<br>1.26706600<br>O -0.25628100 -0.34607600<br>1.38635800<br>H 0.77376300 -0.27982800<br>1.35640800<br>P 3.16431500 -0.25154100<br>0.07126500<br>O 2.27111400 -0.22476000<br>1.29926700<br>O 2.52721400 -0.81771300 -<br>1.27837100<br>H 1.53270400 -0.67593800 -<br>1.33062900<br>C 4.73603400 -1.09626500<br>0.26820700 | <b>2Br-MeCl</b><br>P -1.08528400 -0.27432100 -<br>0.03874300<br>O -0.24623500 -0.60618800 -<br>1.25649300<br>O -0.48760400 -0.61273000<br>1.39663000<br>H 0.54392000 -0.65972200<br>1.39682200<br>P 2.90391000 -0.58287900<br>0.11294000<br>O 2.04597700 -0.76370400<br>1.36008400<br>O 2.31229800 -1.17907500 -<br>1.25407500<br>H 1.32911800 -0.99426700 -<br>1.34135300<br>C 4.56482100 -1.27152500<br>0.23195000 | <b>2Br-MeBr</b><br>P 1.40049900 -0.31061800 -<br>0.03693500<br>O 0.59819900 -0.74217900 -<br>1.24800000<br>O 0.89126600 -0.76682000<br>1.40056400<br>H -0.12570800 -0.94052600<br>1.42393400<br>P -2.49644500 -1.02660900<br>0.17879900<br>O -1.61063200 -1.22043700<br>1.40643200<br>O -1.90072300 -1.54922400 -<br>1.21926900<br>H -0.94036300 -1.27861600 -<br>1.32687300<br>Br -2.90926400 1.16736200 -<br>0.12859500 |

|                                                                                                                                                                                                                                                                                                                                                                                                                     |                                                                                                                                                                                                                                                                                                                                                                                                                      |                                                                                                                                                                                                                                                                                                                                                                                                                        |
|---------------------------------------------------------------------------------------------------------------------------------------------------------------------------------------------------------------------------------------------------------------------------------------------------------------------------------------------------------------------------------------------------------------------|----------------------------------------------------------------------------------------------------------------------------------------------------------------------------------------------------------------------------------------------------------------------------------------------------------------------------------------------------------------------------------------------------------------------|------------------------------------------------------------------------------------------------------------------------------------------------------------------------------------------------------------------------------------------------------------------------------------------------------------------------------------------------------------------------------------------------------------------------|
| H 5.28406500 -0.63047300<br>1.09501000<br>H 4.53680100 -2.14919500<br>0.49885500<br>H 5.30807000 -1.01522300 -<br>0.66296300<br>Br -1.82021500 1.86686000 -<br>0.08048500<br>Br -2.66641800 -1.56061000<br>0.01702800<br>F 3.62265800 1.25758800 -<br>0.30496200                                                                                                                                                    | H 5.07407300 -0.80887200<br>1.08416300<br>H 4.46745200 -2.35285700<br>0.38940100<br>H 5.10619500 -1.06664800 -<br>0.69786700<br>Br -1.59681200 1.90230800<br>0.00047400<br>Cl 3.19910600 1.44629700 -<br>0.25376700<br>Br -3.04608100 -1.32145200 -<br>0.04510800                                                                                                                                                    | Br 3.49649400 -1.04560900 -<br>0.09842700<br>Br 1.57253200 1.91793400<br>0.04497400<br>C -4.12131000 -1.80269800<br>0.29418800<br>H -3.96585300 -2.88327300<br>0.40585700<br>H -4.63812400 -1.39999800<br>1.17173300<br>H -4.68624600 -1.58768500 -<br>0.61905000                                                                                                                                                      |
| <b>CIF-CIF</b><br>P 2.00652500 0.30891900<br>0.02214100<br>O 1.11871600 0.17207200<br>1.23197700<br>O 1.34076000 0.36480700 -<br>1.41352200<br>H 0.36534900 0.08713100 -<br>1.39792700<br>P -2.03845400 -0.42485600 -<br>0.08351600<br>O -1.13330100 -0.34301000 -<br>1.28555900<br>O -1.39592800 -0.37201100<br>1.36257800<br>H -0.40496200 -0.15533600<br>1.33958100<br>F -2.88516700 -1.78088700 -<br>0.05964200 | <b>CIF-BrF</b><br>P -1.49750700 0.78996000 -<br>0.08246500<br>O -0.60420700 0.73705200 -<br>1.29734700<br>O -0.82553800 0.75951200<br>1.35506600<br>H 0.09065500 0.32803600<br>1.33412500<br>P 2.42785400 -0.37219900 -<br>0.01778300<br>O 1.50267700 -0.34471100<br>1.17141800<br>O 1.83303300 -0.08604800 -<br>1.45706200<br>H 0.87333400 0.24197700 -<br>1.42344400<br>Br -3.08634000 -0.73545500 -<br>0.11556800 | <b>CIF-BrCl</b><br>P -2.70056900 -0.48775700<br>0.14320600<br>O -1.85991300 -0.08587600<br>1.32775800<br>O -1.97606100 -0.93497700 -<br>1.19191500<br>H -1.02006100 -0.59223200 -<br>1.24117400<br>P 1.31955400 0.21483100 -<br>0.00632600<br>O 0.42590300 -0.02115500 -<br>1.20785400<br>O 0.72423600 -0.12500700<br>1.43427100<br>H -0.29016900 -0.11037000<br>1.43670700<br>F -3.65084500 -1.73617900<br>0.44783400 |

|                                                                                                                                                                                                                                                                                                                                                                                                                                                                                                                                                          |                                                                                                                                                                                                                                                                                                                                                                                                                                                                                                                                                          |                                                                                                                                                                                                                                                                                                                                                                                                                                                                                                                                               |
|----------------------------------------------------------------------------------------------------------------------------------------------------------------------------------------------------------------------------------------------------------------------------------------------------------------------------------------------------------------------------------------------------------------------------------------------------------------------------------------------------------------------------------------------------------|----------------------------------------------------------------------------------------------------------------------------------------------------------------------------------------------------------------------------------------------------------------------------------------------------------------------------------------------------------------------------------------------------------------------------------------------------------------------------------------------------------------------------------------------------------|-----------------------------------------------------------------------------------------------------------------------------------------------------------------------------------------------------------------------------------------------------------------------------------------------------------------------------------------------------------------------------------------------------------------------------------------------------------------------------------------------------------------------------------------------|
| F 2.88307600 1.64491000<br>0.05915200<br>Cl 3.47121400 -1.09968300 -<br>0.05617200<br>Cl -3.53546300 0.95055300 -<br>0.10502100                                                                                                                                                                                                                                                                                                                                                                                                                          | F 3.13842100 -1.79349800 -<br>0.19292700<br>F -2.35836200 2.13665400 -<br>0.01741900<br>Cl 4.05122400 0.83499700<br>0.19136000                                                                                                                                                                                                                                                                                                                                                                                                                           | Br 3.19914600 -0.94796200 -<br>0.07917200<br>Cl 1.92958000 2.17714600<br>0.07389100<br>Cl -4.07925700 0.92550300 -<br>0.34986300                                                                                                                                                                                                                                                                                                                                                                                                              |
| <b>CIF-HMe</b><br>P 1.39174200 -0.35717700 -<br>0.09821400<br>O 0.43610200 -0.34115100 -<br>1.26441700<br>O 0.83157100 -0.57402600<br>1.35490900<br>H -0.21425700 -0.42834900<br>1.41839400<br>P -2.48435000 -0.07013300<br>0.18932400<br>O -1.63209300 -0.23554100<br>1.46013800<br>H -3.84087000 -0.39861600<br>0.42895300<br>O -2.14309700 -1.07703200 -<br>1.03865400<br>H -1.19099600 -0.96504100 -<br>1.29221000<br>C -2.43052600 1.61869500 -<br>0.46894400<br>H -3.12372800 1.71103700 -<br>1.31408500<br>H -2.69399700 2.32849800<br>0.32455000 | <b>CIF-2Me</b><br>P 1.68573500 -0.37793100 -<br>0.08312900<br>O 0.80117000 -0.29833800 -<br>1.30318500<br>O 1.04110600 -0.58544600<br>1.32823200<br>H -0.04303300 -0.46561700<br>1.33926300<br>P -2.18436000 0.04577400<br>0.06936700<br>O -1.39568700 -0.32932500<br>1.34625900<br>O -1.82552000 -0.84677400 -<br>1.24147600<br>H -0.85297400 -0.77978600 -<br>1.42550500<br>C -1.90390200 1.78028700 -<br>0.39421400<br>H -2.52372500 2.04636100 -<br>1.25886200<br>H -2.13618000 2.43036000<br>0.45790400<br>H -0.84485600 1.88760600 -<br>0.66061400 | <b>CIF-MeF</b><br>P -1.77655300 0.34378500<br>0.06240700<br>O -0.89683500 0.38630500<br>1.28465200<br>O -1.11457100 0.40208800 -<br>1.36877200<br>H -0.09141900 0.25982400 -<br>1.34836300<br>P 2.28394300 -0.05167000 -<br>0.07581900<br>O 1.39036600 0.09009200 -<br>1.29599100<br>O 1.71649500 0.50738100<br>1.30757300<br>H 0.71344300 0.47625000<br>1.35968400<br>C 3.93935400 0.62169700 -<br>0.24093200<br>H 4.43040200 0.14181800 -<br>1.09501000<br>H 3.85847500 1.70095700 -<br>0.41473200<br>H 4.50033800 0.42846100<br>0.68039100 |

|                                                                                                                                                                                                                                                                                                                                                                                                                |                                                                                                                                                                                                                                                                                                                                                                                                                |                                                                                                                                                                                                                                                                                                                                                                                                                    |
|----------------------------------------------------------------------------------------------------------------------------------------------------------------------------------------------------------------------------------------------------------------------------------------------------------------------------------------------------------------------------------------------------------------|----------------------------------------------------------------------------------------------------------------------------------------------------------------------------------------------------------------------------------------------------------------------------------------------------------------------------------------------------------------------------------------------------------------|--------------------------------------------------------------------------------------------------------------------------------------------------------------------------------------------------------------------------------------------------------------------------------------------------------------------------------------------------------------------------------------------------------------------|
| H -1.40519400 1.81021500 -<br>0.81160500<br>F 2.52286500 -1.48462200 -<br>0.23363500<br>Cl 2.56291000 1.32288000 -<br>0.05302800                                                                                                                                                                                                                                                                               | C -3.95331100 -0.25158900<br>0.28396300<br>H -4.09682500 -1.31234900<br>0.52091400<br>H -4.32236900 0.36146700<br>1.11488500<br>H -4.48875400 -0.00159600 -<br>0.63966200<br>F 2.77937000 -1.54746300 -<br>0.19592800<br>Cl 2.92764200 1.25143600<br>0.05174700                                                                                                                                                | F -2.82955900 1.55078300<br>0.02380100<br>Cl -3.05069200 -1.24925900<br>0.06621100<br>F 2.56913600 -1.62093600<br>0.21442100                                                                                                                                                                                                                                                                                       |
| <b>ClF-MeCl</b><br>P -1.92685300 0.41400700<br>0.09312200<br>O -1.04188900 0.40748500<br>1.31197500<br>O -1.29114500 0.67845800 -<br>1.32660000<br>H -0.25714200 0.65162700 -<br>1.32488500<br>P 2.08915800 0.25635600 -<br>0.08956400<br>O 1.23583300 0.64525800 -<br>1.29224700<br>O 1.56079700 0.74168800<br>1.34543300<br>H 0.56587700 0.63880500<br>1.42558000<br>C 3.79871200 0.81999200 -<br>0.16458300 | <b>ClF-MeBr</b><br>P -2.21399200 0.45756900<br>0.09052300<br>O -1.34354200 0.56632300<br>1.31477900<br>O -1.61704500 0.82474000 -<br>1.32348600<br>H -0.58726000 0.91751500 -<br>1.32311000<br>P 1.77183100 0.71793600 -<br>0.08351700<br>O 0.90006900 1.07816200 -<br>1.28415300<br>O 1.21481600 1.16189300<br>1.35679600<br>H 0.23531000 0.96460800<br>1.44274200<br>C 3.44652700 1.38605500 -<br>0.14593400 | <b>BrF-BrF</b><br>P -1.89205500 0.73322300 -<br>0.08510700<br>O -1.00677600 0.51218200 -<br>1.28685000<br>O -1.22182300 0.77918500<br>1.35283900<br>H -0.34017800 0.28089600<br>1.37552200<br>P 1.89852400 -0.73904200<br>0.07887100<br>O 1.01787500 -0.51158500<br>1.28278400<br>O 1.22236600 -0.79690300 -<br>1.35593300<br>H 0.34476000 -0.29174300 -<br>1.38065800<br>Br -3.58811400 -0.67043400<br>0.01132400 |



|                                                                                                                                                                                                                                                                                                                                                                                                                 |                                                                                                                                                                                                                                                                                                                                                                                                                      |                                                                                                                                                                                                                                                                                                                                                                                                                        |
|-----------------------------------------------------------------------------------------------------------------------------------------------------------------------------------------------------------------------------------------------------------------------------------------------------------------------------------------------------------------------------------------------------------------|----------------------------------------------------------------------------------------------------------------------------------------------------------------------------------------------------------------------------------------------------------------------------------------------------------------------------------------------------------------------------------------------------------------------|------------------------------------------------------------------------------------------------------------------------------------------------------------------------------------------------------------------------------------------------------------------------------------------------------------------------------------------------------------------------------------------------------------------------|
| H 4.26008500 0.41565000 -<br>1.07193600<br>H 3.78764800 1.91640800 -<br>0.20038500<br>H 4.33124200 0.47080300<br>0.72655700<br>F -3.08578600 1.51681900<br>0.18484900<br>Cl 2.22150000 -1.81739700<br>0.04301500<br>Cl -3.05157500 -1.28072000 -<br>0.06995500                                                                                                                                                  | H 3.93228200 1.02413300 -<br>1.05829300<br>H 3.36695500 2.48040200 -<br>0.16454200<br>H 3.99672200 1.05538700<br>0.74139300<br>F -3.51864400 1.38276900<br>0.18290500<br>Cl -3.08372000 -1.37963500 -<br>0.09280200<br>Br 2.03120500 -1.51683500<br>0.03280500                                                                                                                                                       | F 2.66152100 -2.14325200<br>0.14145100<br>Br 3.59099900 0.66782500 -<br>0.03328200<br>F -2.65197800 2.13940900 -<br>0.14202200                                                                                                                                                                                                                                                                                         |
| <b>BrF-BrCl</b><br>P -2.05502200 0.94304600 -<br>0.21634400<br>O -1.12759800 0.75556100 -<br>1.39176700<br>O -1.44817200 1.46003000<br>1.15600900<br>H -0.47758100 1.18546100<br>1.26634700<br>P 1.93983100 0.51212200<br>0.11270800<br>O 1.01897200 0.71405100<br>1.29948800<br>O 1.44849200 1.05586600 -<br>1.30592800<br>H 0.44589700 0.95582100 -<br>1.40713500<br>F -3.19828300 2.02814600 -<br>0.49077500 | <b>BrF-HMe</b><br>P 0.96211800 -0.87474400 -<br>0.09960600<br>O 0.02472300 -0.79173300 -<br>1.27888200<br>O 0.36585400 -1.07084200<br>1.34543000<br>H -0.60998700 -0.67999700<br>1.43013800<br>P -2.74567900 0.18653900<br>0.19834700<br>O -1.94600300 -0.13890000<br>1.47209400<br>H -4.14017500 0.18965700<br>0.44540000<br>O -2.65674000 -0.90403500 -<br>1.00233000<br>H -1.70813200 -1.02271500 -<br>1.26404300 | <b>BrF-2Me</b><br>P 1.25634500 -0.86592000 -<br>0.07559400<br>O 0.38307400 -0.86953600 -<br>1.30696100<br>O 0.59856800 -1.01642700<br>1.34052900<br>H -0.43261800 -0.68226900<br>1.36620900<br>P -2.47849600 0.13333600<br>0.06962300<br>O -1.74157500 -0.26562400<br>1.36905300<br>O -2.30452700 -0.91251100 -<br>1.16368900<br>H -1.34038200 -1.03794800 -<br>1.35807500<br>C -1.91290800 1.74999900 -<br>0.53870300 |

|                                                                                                                                                                                                                                                                                  |                                                                                                                                                                                                                                                                                  |                                                                                                                                                                                                                                                                                                                                                                                                   |
|----------------------------------------------------------------------------------------------------------------------------------------------------------------------------------------------------------------------------------------------------------------------------------|----------------------------------------------------------------------------------------------------------------------------------------------------------------------------------------------------------------------------------------------------------------------------------|---------------------------------------------------------------------------------------------------------------------------------------------------------------------------------------------------------------------------------------------------------------------------------------------------------------------------------------------------------------------------------------------------|
| Cl 3.74926200 1.43221500<br>0.34220300<br>Br 2.42481100 -1.64186100 -<br>0.15652500<br>Br -3.25678900 -0.85629100<br>0.20201800                                                                                                                                                  | C -2.30354200 1.79881200 -<br>0.50471300<br>H -2.95687300 2.02588800 -<br>1.35611000<br>H -2.39562100 2.57131700<br>0.26836100<br>H -1.26155000 1.74045100 -<br>0.84577600<br>Br 2.33831000 0.86635300 -<br>0.03401600<br>F 2.01160500 -2.08140800 -<br>0.21404400               | H -2.48570500 2.04231800 -<br>1.42696100<br>H -2.02662300 2.49946800<br>0.25381200<br>H -0.85230800 1.65872200 -<br>0.80490200<br>C -4.26857400 0.16694500<br>0.31262900<br>H -4.58977300 -0.83055800<br>0.63476000<br>H -4.51140700 0.89846300<br>1.09262000<br>H -4.76839400 0.43279500 -<br>0.62640200<br>F 2.36368300 -2.02755200 -<br>0.09811200<br>Br 2.56091500 0.93750900 -<br>0.02715000 |
| <b>BrF-MeF</b><br>P -1.26694300 0.73888900<br>0.06123500<br>O -0.38101600 0.74516400<br>1.28193200<br>O -0.59840900 0.75702900 -<br>1.37150600<br>H 0.38420600 0.44204900 -<br>1.35720400<br>P 2.70716900 -0.14785000 -<br>0.07707700<br>O 1.82009400 0.02103700 -<br>1.29829900 | <b>BrF-MeCl</b><br>P -1.46559100 0.89815700<br>0.10572600<br>O -0.58260400 0.85948600<br>1.32759200<br>O -0.80849800 1.13847300 -<br>1.31225100<br>H 0.19620100 0.90260200 -<br>1.33512100<br>P 2.45957100 0.13538200 -<br>0.09900200<br>O 1.66530200 0.59020100 -<br>1.31844600 | <b>BrF-MeBr</b><br>P -1.76522800 0.94578100<br>0.12656500<br>O -0.88972900 1.05649600<br>1.34910300<br>O -1.17048400 1.33580000 -<br>1.28625700<br>H -0.14351500 1.24941000 -<br>1.32517600<br>P 2.17337000 0.65340400 -<br>0.11692800<br>O 1.36090100 1.13890000 -<br>1.31443400                                                                                                                 |

|                                                                                                                                                                                                                                                                                                                                                                                           |                                                                                                                                                                                                                                                                                                                                                                                              |                                                                                                                                                                                                                                                                                                                                                                                             |
|-------------------------------------------------------------------------------------------------------------------------------------------------------------------------------------------------------------------------------------------------------------------------------------------------------------------------------------------------------------------------------------------|----------------------------------------------------------------------------------------------------------------------------------------------------------------------------------------------------------------------------------------------------------------------------------------------------------------------------------------------------------------------------------------------|---------------------------------------------------------------------------------------------------------------------------------------------------------------------------------------------------------------------------------------------------------------------------------------------------------------------------------------------------------------------------------------------|
| O 2.23116500 0.56437700<br>1.27033300<br>H 1.23236000 0.65214200<br>1.33510600<br>C 4.42973600 0.30762500 -<br>0.29353100<br>H 4.84816400 -0.28102000 -<br>1.11772200<br>H 4.47774600 1.37563200 -<br>0.53565900<br>H 4.97514300 0.10602000<br>0.63531500<br>Br -2.74140200 -0.90595700<br>0.09199600<br>F 2.80463300 -1.71822700<br>0.31319600<br>F -2.24037100 2.01243400<br>0.00284200 | O 2.04293900 0.78529400<br>1.30772100<br>H 1.04625900 0.84434200<br>1.40671900<br>C 4.23842300 0.39701700 -<br>0.21520100<br>H 4.61161100 -0.13038200 -<br>1.09964200<br>H 4.41174200 1.47565500 -<br>0.31525100<br>H 4.71771500 0.01411700<br>0.69214700<br>Br -2.76573000 -0.88207500 -<br>0.05396500<br>F -2.56217500 2.06601600<br>0.17684000<br>Cl 2.24350800 -1.91997000<br>0.15767400 | O 1.73750600 1.22712000<br>1.31975300<br>H 0.74218300 1.19794400<br>1.43470700<br>C 3.94186000 0.99465800 -<br>0.22035000<br>H 4.33447100 0.52506900 -<br>1.12849600<br>H 4.06753000 2.08373900 -<br>0.26965400<br>H 4.43707300 0.59004600<br>0.66870300<br>Br -2.69588400 -1.05034900 -<br>0.06780200<br>F -3.06525600 1.87916100<br>0.21485300<br>Br 2.00955800 -1.58727900<br>0.05850000 |
| <b>BrCl-BrCl</b><br>P -1.95015000 0.50212700<br>0.05016200<br>O -1.04128900 0.52101800<br>1.26266300<br>O -1.26931300 0.63915700 -<br>1.38699100<br>H -0.35590300 0.19791200 -<br>1.40063900<br>P 1.95071100 -0.50242900 -<br>0.04925700<br>O 1.04242900 -0.52066700 -<br>1.26219400                                                                                                      | <b>BrCl-HMe</b><br>P 0.75170300 0.31107400 -<br>0.00628200<br>O -0.12938300 0.07921800 -<br>1.21816200<br>O 0.04260100 0.57205200<br>1.38488900<br>H -0.92714600 0.14588000<br>1.42538200<br>P -3.02929000 -0.58978000<br>0.11084200<br>O -2.23820500 -0.43016800<br>1.42201100                                                                                                              | <b>BrCl-2Me</b><br>P 1.17064000 -0.61653200 -<br>0.04995000<br>O 0.31021100 -0.85897900 -<br>1.27335400<br>O 0.52978400 -0.79586900<br>1.37756500<br>H -0.53181400 -0.56239600<br>1.39177300<br>P -2.64516400 -0.05015600<br>0.05995500<br>O -1.87345000 -0.27984000<br>1.38058600                                                                                                          |

|                                                                                                                                                                                                                                                                  |                                                                                                                                                                                                                                                                                                                                                                                                        |                                                                                                                                                                                                                                                                                                                                                                                                                                                                                                                                            |
|------------------------------------------------------------------------------------------------------------------------------------------------------------------------------------------------------------------------------------------------------------------|--------------------------------------------------------------------------------------------------------------------------------------------------------------------------------------------------------------------------------------------------------------------------------------------------------------------------------------------------------------------------------------------------------|--------------------------------------------------------------------------------------------------------------------------------------------------------------------------------------------------------------------------------------------------------------------------------------------------------------------------------------------------------------------------------------------------------------------------------------------------------------------------------------------------------------------------------------------|
| O 1.26924400 -0.64137500<br>1.38744000<br>H 0.35632900 -0.19914400<br>1.40145700<br>Br -3.18699000 -1.34803300 -<br>0.00880800<br>Br 3.18633000 1.34846500<br>0.01204400<br>Cl 3.30122000 -2.03448500 -<br>0.06196100<br>Cl -3.29975600 2.03502100<br>0.06210800 | H -4.21769400 -1.33140000<br>0.31577700<br>O -2.32012900 -1.47731200 -<br>1.05080300<br>H -1.44787400 -1.06500100 -<br>1.28117900<br>C -3.48118100 1.00123500 -<br>0.63270600<br>H -4.11827600 0.83458000 -<br>1.50993100<br>H -4.00152400 1.61772700<br>0.11023100<br>H -2.55201000 1.49767400 -<br>0.94169400<br>Cl 1.97725600 1.94510700 -<br>0.24551700<br>Br 2.16832000 -1.38904600<br>0.30240200 | O -2.35534400 -1.15112100 -<br>1.10075600<br>H -1.38176500 -1.18838100 -<br>1.28952200<br>C -2.25799200 1.57508700 -<br>0.65504500<br>H -2.84683100 1.73788500 -<br>1.56570300<br>H -2.46984000 2.35817800<br>0.08298400<br>H -1.18953300 1.59195100 -<br>0.90437500<br>C -4.42906800 -0.19436700<br>0.30871600<br>H -4.64131400 -1.19725700<br>0.69739900<br>H -4.75156500 0.55663900<br>1.03977400<br>H -4.95231700 -0.04673600 -<br>0.64351600<br>Br 1.99625800 1.47523400 -<br>0.12060900<br>Cl 2.84530700 -1.80627500 -<br>0.00809000 |
| <b>BrCl-MeF</b><br>P -1.24334700 -0.55356800 -<br>0.05295100<br>O -0.36344200 -0.71219100 -<br>1.27517900<br>O -0.56872400 -0.69957100<br>1.37880900                                                                                                             | <b>BrCl-MeCl</b><br>P -1.41834100 -0.61700300 -<br>0.07225200<br>O -0.55018400 -0.83902100 -<br>1.29267600<br>O -0.80346200 -0.94143600<br>1.35729200                                                                                                                                                                                                                                                  | <b>BrCl-MeBr</b><br>P -1.74078000 -0.62635700 -<br>0.09843700<br>O -0.89043700 -0.94229900 -<br>1.31043700<br>O -1.21821300 -1.09053200<br>1.32970500                                                                                                                                                                                                                                                                                                                                                                                      |

|                                                                                                                                                                                                                                                                                                                                                                                                                                                                                                                                  |                                                                                                                                                                                                                                                                                                                                                                                                                                                                                                                                   |                                                                                                                                                                                                                                                                                                                                                                                                                                                                                                                                    |
|----------------------------------------------------------------------------------------------------------------------------------------------------------------------------------------------------------------------------------------------------------------------------------------------------------------------------------------------------------------------------------------------------------------------------------------------------------------------------------------------------------------------------------|-----------------------------------------------------------------------------------------------------------------------------------------------------------------------------------------------------------------------------------------------------------------------------------------------------------------------------------------------------------------------------------------------------------------------------------------------------------------------------------------------------------------------------------|------------------------------------------------------------------------------------------------------------------------------------------------------------------------------------------------------------------------------------------------------------------------------------------------------------------------------------------------------------------------------------------------------------------------------------------------------------------------------------------------------------------------------------|
| H 0.43195000 -0.45080900<br>1.36440200<br>P 2.78727200 -0.02798600<br>0.07160600<br>O 1.89886800 -0.12275000<br>1.29967400<br>O 2.25065800 -0.70887100 -<br>1.26884000<br>H 1.24674000 -0.72483000 -<br>1.32730300<br>C 4.47287800 -0.60966900<br>0.27913600<br>H 4.93909200 -0.05067600<br>1.09832500<br>H 4.44300900 -1.67734900<br>0.52556600<br>H 5.02595200 -0.45271900 -<br>0.65378700<br>Cl -2.76702700 -1.92576000<br>0.00349200<br>F 3.00065400 1.52882800 -<br>0.32825600<br>Br -2.28445400 1.41855500 -<br>0.06774900 | H 0.22159400 -0.82632000<br>1.37803800<br>P 2.55845200 -0.38008100<br>0.11551300<br>O 1.72429700 -0.68987900<br>1.35336400<br>O 2.06642600 -1.03888300 -<br>1.26219800<br>H 1.06808000 -0.99285000 -<br>1.35938800<br>C 4.29824400 -0.83150200<br>0.24289800<br>H 4.73262000 -0.30773800<br>1.10118400<br>H 4.35198500 -1.91680600<br>0.39375500<br>H 4.81152500 -0.54698700 -<br>0.68188700<br>Cl -3.13238700 -1.74205900 -<br>0.11069100<br>Br -2.14639000 1.49028300<br>0.01570400<br>Cl 2.57124800 1.67415800 -<br>0.23085900 | H -0.18872800 -1.12276200<br>1.37801400<br>P 2.19835400 -0.88191100<br>0.17237700<br>O 1.32323600 -1.19357900<br>1.38332300<br>O 1.68745800 -1.44927300 -<br>1.24170000<br>H 0.70424100 -1.29020500 -<br>1.36399700<br>C 3.90013000 -1.46721100<br>0.30345600<br>H 4.35489000 -1.01952900<br>1.19347800<br>H 3.86902100 -2.55991400<br>0.39997800<br>H 4.44904200 -1.17615000 -<br>0.59841100<br>Cl -3.60797700 -1.46630800 -<br>0.20663000<br>Br -2.13052800 1.56544900<br>0.05320700<br>Br 2.36035300 1.34926600 -<br>0.10029900 |
| <b>HMe-HMe</b><br>P 1.86649100 0.13620900<br>0.41565600<br>O 0.93756800 -0.69812700<br>1.31082300<br>O 1.25180100 1.52234200 -<br>0.15641800                                                                                                                                                                                                                                                                                                                                                                                     | <b>HMe-2Me</b><br>P -2.22299000 0.23127700<br>0.12216000<br>O -1.37552700 0.48384100<br>1.37808000<br>O -1.61429600 0.77838100 -<br>1.27436800                                                                                                                                                                                                                                                                                                                                                                                    | <b>HMe-MeF</b><br>P -1.61521000 0.02088700<br>0.10421200<br>O -0.70757800 0.07369600<br>1.31911800<br>O -1.08478200 -0.74653500 -<br>1.18286100                                                                                                                                                                                                                                                                                                                                                                                    |

|                                           |                                           |                                           |
|-------------------------------------------|-------------------------------------------|-------------------------------------------|
| H 0.39331300 1.32751900 -<br>0.65552400   | H -0.68496400 0.38436100 -<br>1.40944000  | H -0.05763300 -0.74421000 -<br>1.27073900 |
| P -1.86712300 -0.13666800 -<br>0.41568800 | P 1.60919800 -0.04937200 -<br>0.09252100  | P 2.27977500 -0.26988300 -<br>0.09465200  |
| O -0.93834900 0.69761400 -<br>1.31106400  | O 0.72058100 -0.32941900 -<br>1.31935000  | O 1.45645300 -0.71290400 -<br>1.31334900  |
| O -1.25251000 -1.52300400<br>0.15599500   | O 1.01617000 -0.58433700<br>1.32278600    | H 3.60215300 -0.78080700 -<br>0.13077500  |
| H -0.39403700 -1.32832600<br>0.65513200   | H 0.08789700 -0.21545400<br>1.46310800    | O 1.78097800 -0.81996000<br>1.34776100    |
| C 2.48446800 -0.80192500 -<br>1.01221500  | C 1.90365700 1.73443500<br>0.12218000     | H 0.82698200 -0.55193200<br>1.48290600    |
| C -2.48440700 0.80137800<br>1.01253900    | H 2.33804600 2.15007700 -<br>0.79520700   | C 2.40447100 1.53683200<br>0.03763600     |
| H 1.62264100 -1.05020700 -<br>1.64538800  | H 0.93335200 2.20970900<br>0.31341000     | H 3.06419400 1.80602100<br>0.87173900     |
| H 3.19473000 -0.19048600 -<br>1.58231000  | H 2.56975500 1.91145100<br>0.97522400     | H 2.78784300 1.94696700 -<br>0.90456800   |
| H 2.96356800 -1.72569800 -<br>0.66545100  | C 3.20791800 -0.89746900 -<br>0.19229600  | H 1.39621600 1.92886800<br>0.22549000     |
| H -3.19470000 0.19004900<br>1.58271300    | H 3.02169200 -1.97349300 -<br>0.29025300  | C -3.28908900 -0.57442400<br>0.38681100   |
| H -1.62231900 1.04925500<br>1.64551500    | H 3.74996800 -0.54049900 -<br>1.07639200  | H -3.75580900 0.03992600<br>1.16501300    |
| H -2.96331200 1.72537100<br>0.66609200    | H 3.79342700 -0.70510700<br>0.71474700    | H -3.85992700 -0.50840600 -<br>0.54622600 |
| H -3.00138500 -0.61872800 -<br>1.11898600 | C -2.60107800 -1.53048400 -<br>0.11689200 | H -3.23376500 -1.61736700<br>0.71995200   |
| H 3.00043600 0.61857000<br>1.11926400     | H -1.65242300 -2.04942700 -<br>0.30659700 | F -1.88343700 1.54219000 -<br>0.41793900  |
|                                           | H -3.06595600 -1.93416900<br>0.79084800   |                                           |

|                                                                                                                                                                                                                                                                                                                                                                                                                                                                                                                                                                                                       |                                                                                                                                                                                                                                                                                                                                                                                                                                                                                                                                                                                                      |                                                                                                                                                                                                                                                                                                                                                                                                                                                                                                                                                                                               |
|-------------------------------------------------------------------------------------------------------------------------------------------------------------------------------------------------------------------------------------------------------------------------------------------------------------------------------------------------------------------------------------------------------------------------------------------------------------------------------------------------------------------------------------------------------------------------------------------------------|------------------------------------------------------------------------------------------------------------------------------------------------------------------------------------------------------------------------------------------------------------------------------------------------------------------------------------------------------------------------------------------------------------------------------------------------------------------------------------------------------------------------------------------------------------------------------------------------------|-----------------------------------------------------------------------------------------------------------------------------------------------------------------------------------------------------------------------------------------------------------------------------------------------------------------------------------------------------------------------------------------------------------------------------------------------------------------------------------------------------------------------------------------------------------------------------------------------|
|                                                                                                                                                                                                                                                                                                                                                                                                                                                                                                                                                                                                       | H -3.26698200 -1.65691000 -<br>0.97943600<br>H -3.46461700 0.91812200<br>0.16426600                                                                                                                                                                                                                                                                                                                                                                                                                                                                                                                  |                                                                                                                                                                                                                                                                                                                                                                                                                                                                                                                                                                                               |
| <b>HMe-MeCl</b><br>P 1.44715800 -0.41214700 -<br>0.12722700<br>O 0.57089500 -0.81014900 -<br>1.30479500<br>O 0.91105500 -0.75056700<br>1.33639900<br>H -0.10136000 -0.58267600<br>1.43463900<br>P -2.41126100 -0.14406100<br>0.16296200<br>O -1.59468200 -0.31960000<br>1.45215500<br>H -3.78337200 -0.44721700<br>0.35479600<br>O -2.04894700 -1.14601600 -<br>1.05939400<br>H -1.06899200 -1.10223300 -<br>1.25566600<br>C -2.32430400 1.55021200 -<br>0.48329300<br>H -2.95921200 1.64409900 -<br>1.37286300<br>H -2.64623600 2.25238800<br>0.29554200<br>H -1.27953100 1.75854800 -<br>0.74905300 | <b>HMe-MeBr</b><br>P 1.04591400 -0.93829900 -<br>0.12898500<br>O 0.10888400 -1.20868900 -<br>1.29782700<br>O 0.46193500 -1.14034400<br>1.34303300<br>H -0.49564500 -0.76994900<br>1.43977900<br>P -2.70025800 0.06473700<br>0.16787500<br>O -1.90279200 -0.21146800<br>1.45154100<br>H -4.10036900 -0.00982800<br>0.38240200<br>O -2.52185900 -1.00862400 -<br>1.03377700<br>H -1.55081700 -1.15368600 -<br>1.22846000<br>C -2.35607800 1.70972000 -<br>0.51750600<br>H -2.98182700 1.88433000 -<br>1.40139700<br>H -2.55194700 2.46950300<br>0.24916700<br>H -1.29542700 1.74593900 -<br>0.79898300 | <b>2Me-2Me</b><br>P 1.95732800 -0.00391300<br>0.05455700<br>O 1.10131800 0.03631600<br>1.33307000<br>O 1.33252700 -0.85450400 -<br>1.17595600<br>H 0.37117400 -0.57774000 -<br>1.32997200<br>P -1.95744000 -0.00424600 -<br>0.05462000<br>O -1.10149900 0.03591900 -<br>1.33318100<br>O -1.33251700 -0.85469300<br>1.17594000<br>H -0.37121600 -0.57774700<br>1.32993300<br>C 3.56876300 -0.80015800<br>0.30345300<br>C 2.25032500 1.67887200 -<br>0.58052100<br>C -2.25049100 1.67857700<br>0.58032800<br>C -3.56883500 -0.80061800 -<br>0.30335900<br>H 2.68286600 2.30355400<br>0.21058200 |

|                                                                                                                                                                                                                        |                                                                                                                                                                                                                        |                                                                                                                                                                                                                                                                                                                                                                                                                                                                                         |
|------------------------------------------------------------------------------------------------------------------------------------------------------------------------------------------------------------------------|------------------------------------------------------------------------------------------------------------------------------------------------------------------------------------------------------------------------|-----------------------------------------------------------------------------------------------------------------------------------------------------------------------------------------------------------------------------------------------------------------------------------------------------------------------------------------------------------------------------------------------------------------------------------------------------------------------------------------|
| C 3.13790300 -1.04297400 -<br>0.16790700<br>H 3.60857200 -0.72462000 -<br>1.10420500<br>H 3.68960700 -0.65244700<br>0.69384400<br>H 3.08529800 -2.13799000 -<br>0.12375700<br>Cl 1.70083800 1.67825600 -<br>0.14536700 | C 2.59466900 -1.86985100 -<br>0.14843700<br>H 3.11170800 -1.66979800 -<br>1.09282600<br>H 3.21042200 -1.56087300<br>0.70282800<br>H 2.34045200 -2.93477400 -<br>0.07186100<br>Br 1.72019600 1.23727000 -<br>0.21010200 | H 2.91848800 1.64815800 -<br>1.44968700<br>H 1.28052500 2.09181200 -<br>0.88503100<br>H 3.39492300 -1.82208600<br>0.66075100<br>H 4.12486200 -0.82923900 -<br>0.64139700<br>H 4.13517600 -0.24235900<br>1.05918100<br>H -2.91863100 1.64791700<br>1.44951300<br>H -1.28069400 2.09157200<br>0.88477500<br>H -2.68307100 2.30317400 -<br>0.21082100<br>H -4.12488200 -0.82962800<br>0.64152500<br>H -4.13532600 -0.24293800 -<br>1.05911700<br>H -3.39495000 -1.82257500 -<br>0.66055000 |
| <b>2Me-MeF</b><br>P 1.97805600 -0.02640600 -<br>0.05929200<br>O 1.08374400 0.38936700 -<br>1.21454300<br>O 1.32743100 -0.06360200<br>1.38857600<br>H 0.29735900 -0.21830500<br>1.37834500                              | <b>2Me-MeCl</b><br>P 1.76677300 0.32089900 -<br>0.05513900<br>O 0.87764600 0.53493200 -<br>1.27430400<br>O 1.09683200 0.55951400<br>1.37146800<br>H 0.10305400 0.24568100<br>1.40274900                                | <b>2Me-MeBr</b><br>P 1.33019200 0.79599500 -<br>0.05548100<br>O 0.42584100 0.88217800 -<br>1.28108400<br>O 0.62588300 0.96783700<br>1.36626400<br>H -0.30576600 0.50087000<br>1.40407300                                                                                                                                                                                                                                                                                                |



|                                           |                                           |                                           |
|-------------------------------------------|-------------------------------------------|-------------------------------------------|
| P -1.98581300 0.01101700<br>0.07395100    | P -2.15401800 -0.01688100<br>0.07152000   | P -2.49134300 -0.11231300<br>0.07119800   |
| O -1.16449900 -0.41699400<br>1.30515300   | O -1.30669300 -0.19112100<br>1.34683400   | O -1.62745000 -0.15511300<br>1.34664500   |
| O -1.40545300 -0.49244000 -<br>1.35790300 | O -1.50340900 -0.62971200 -<br>1.28593100 | O -1.75750000 -0.62516600 -<br>1.28538000 |
| H -0.44578200 -0.22300300 -<br>1.44234400 | H -0.58066600 -0.26577200 -<br>1.41259200 | H -0.89992200 -0.12816500 -<br>1.41566900 |
| C -2.11571600 1.82320700 -<br>0.04178700  | Cl 2.46449200 -1.65504200 -<br>0.02722200 | Br 2.35081700 -1.22817100<br>0.00166800   |
| H -2.52383900 2.22475900<br>0.89371000    | C -2.48114800 1.74026200 -<br>0.27347000  | C -3.91886400 -1.21970100<br>0.18489300   |
| H -1.10451800 2.21905300 -<br>0.19914800  | H -2.94682400 2.20817400<br>0.60240100    | H -3.54968700 -2.23678300<br>0.36180700   |
| H -2.75183200 2.10637900 -<br>0.88915700  | H -1.51698100 2.22337900 -<br>0.47604800  | H -4.54975000 -0.90952300<br>1.02657200   |
| F 2.52612200 -1.54075600 -<br>0.29890400  | H -3.12981900 1.84216500 -<br>1.15191300  | H -4.49165300 -1.19130100 -<br>0.74974000 |
| C -3.65259800 -0.69579700<br>0.09256200   | C -3.73077600 -0.89950600<br>0.18192000   | C -3.07578700 1.57588000 -<br>0.27796000  |
| H -3.56153000 -1.78776900<br>0.12900100   | H -3.51757900 -1.96052000<br>0.35753300   | H -3.60551300 1.97155300<br>0.59713700    |
| H -4.18341900 -0.34452600<br>0.98561300   | H -4.30963400 -0.50007300<br>1.02338200   | H -2.19412000 2.19640100 -<br>0.48214400  |
| H -4.19591900 -0.39974300 -<br>0.81278200 | H -4.29166100 -0.78458700 -<br>0.75330700 | H -3.73264800 1.57825500 -<br>1.15621500  |
| C 3.51579400 0.89664000<br>0.09799200     | C 3.28356300 1.30262100 -<br>0.03995200   | C 2.70421900 1.97292000 -<br>0.04521500   |
| H 4.07989600 0.80718100 -<br>0.83724100   | H 3.85816100 1.07442200 -<br>0.94403900   | H 3.30725900 1.81501700 -<br>0.94559800   |
| H 3.27207900 1.94869800<br>0.28606200     | H 2.99782100 2.36180200 -<br>0.03015700   | H 2.27734400 2.98392400 -<br>0.04546500   |

|                                                                                                                                                                                                                                                                                                                                                                                                                                                                                                                                                                                                                                                       |                                                                                                                                                                                                                                                                                                                                                                                                                                                                                                                                                                                                                                           |                                                                                                                                                                                                                                                                                                                                                                                                                                                                                                                                                                                                                                         |
|-------------------------------------------------------------------------------------------------------------------------------------------------------------------------------------------------------------------------------------------------------------------------------------------------------------------------------------------------------------------------------------------------------------------------------------------------------------------------------------------------------------------------------------------------------------------------------------------------------------------------------------------------------|-------------------------------------------------------------------------------------------------------------------------------------------------------------------------------------------------------------------------------------------------------------------------------------------------------------------------------------------------------------------------------------------------------------------------------------------------------------------------------------------------------------------------------------------------------------------------------------------------------------------------------------------|-----------------------------------------------------------------------------------------------------------------------------------------------------------------------------------------------------------------------------------------------------------------------------------------------------------------------------------------------------------------------------------------------------------------------------------------------------------------------------------------------------------------------------------------------------------------------------------------------------------------------------------------|
| H 4.09698000 0.49201100<br>0.93424100                                                                                                                                                                                                                                                                                                                                                                                                                                                                                                                                                                                                                 | H 3.86318400 1.05669400<br>0.85620300                                                                                                                                                                                                                                                                                                                                                                                                                                                                                                                                                                                                     | H 3.30713000 1.81316000<br>0.85493100                                                                                                                                                                                                                                                                                                                                                                                                                                                                                                                                                                                                   |
| <b>MeF-MeF</b><br>P 2.03969700 0.06640700 -<br>0.03767400<br>O 1.17265400 1.29455400 -<br>0.24446800<br>O 1.39574700 -1.34977800 -<br>0.38040700<br>H 0.38108000 -1.35978000 -<br>0.31311600<br>P -2.03973000 -0.06639600 -<br>0.03759500<br>O -1.17270400 -1.29446300 -<br>0.24491500<br>O -1.39578000 1.34991600 -<br>0.37977800<br>H -0.38109800 1.35989900 -<br>0.31256600<br>C 3.64185000 0.09709200 -<br>0.85222000<br>H 3.47919300 0.15208400 -<br>1.93488400<br>H 4.19313500 0.98132600 -<br>0.51289300<br>H 4.19285400 -0.81601500 -<br>0.60012700<br>C -3.64191600 -0.09674800 -<br>0.85209000<br>H -3.47930600 -0.15131700 -<br>1.93478200 | <b>MeF-MeCl</b><br>P -1.84311300 -0.32221100<br>0.06900400<br>O -0.97184100 -0.54668900<br>1.29803000<br>O -1.18123500 -0.64580600 -<br>1.35105900<br>H -0.19984900 -0.38155900 -<br>1.38338500<br>P 2.19594200 -0.00274400 -<br>0.06508300<br>O 1.29401300 0.06171000 -<br>1.28394600<br>O 1.50921000 0.14163600<br>1.36535300<br>H 0.52878500 -0.13036300<br>1.37699800<br>C 3.58394400 1.13923500 -<br>0.06919900<br>H 4.18768000 0.95827400 -<br>0.96563400<br>H 3.18914500 2.16173300 -<br>0.08570200<br>H 4.18431100 0.98210300<br>0.83396100<br>C -3.40495700 -1.22480100<br>0.07147400<br>H -3.17040000 -2.29623200<br>0.09711600 | <b>MeF-MeBr</b><br>P 2.51092000 -0.05470300 -<br>0.06623300<br>O 1.60469300 0.00055800 -<br>1.28229600<br>O 1.81681300 -0.07630000<br>1.36793700<br>H 0.88521700 0.33210200<br>1.37909100<br>P -1.43838300 0.80025600<br>0.07104200<br>O -0.54613300 0.95153600<br>1.29820300<br>O -0.74690000 1.04481300 -<br>1.35282700<br>H 0.18940700 0.64916500 -<br>1.38916000<br>C -2.89761100 1.86492800<br>0.06195100<br>H -3.49096700 1.65299700<br>0.95760800<br>H -2.54852700 2.90528500<br>0.07293700<br>H -3.48075500 1.66541700 -<br>0.84329300<br>F 3.46452500 1.26042200 -<br>0.02364300<br>Br -2.27614600 -1.30054500 -<br>0.01631100 |

|                                                                                                                                                                                                                                                                                                                                                                                                                                                                                                                  |                                                                                                                                                                                                                                                                                                                                                                                                                                                                                                      |                                                                                                                                                                                                                                                                                                                                                                                                                                                                                                                 |
|------------------------------------------------------------------------------------------------------------------------------------------------------------------------------------------------------------------------------------------------------------------------------------------------------------------------------------------------------------------------------------------------------------------------------------------------------------------------------------------------------------------|------------------------------------------------------------------------------------------------------------------------------------------------------------------------------------------------------------------------------------------------------------------------------------------------------------------------------------------------------------------------------------------------------------------------------------------------------------------------------------------------------|-----------------------------------------------------------------------------------------------------------------------------------------------------------------------------------------------------------------------------------------------------------------------------------------------------------------------------------------------------------------------------------------------------------------------------------------------------------------------------------------------------------------|
| H -4.19319700 -0.98110800 -<br>0.51308400<br>H -4.19290000 0.81626700 -<br>0.59961700<br>F 2.45949800 -0.05553800<br>1.52705400<br>F -2.45948900 0.05493500<br>1.52719400                                                                                                                                                                                                                                                                                                                                        | H -3.97295200 -0.93983800<br>0.96350200<br>H -3.96486300 -0.97764100 -<br>0.83680800<br>Cl -2.41954700 1.68554200 -<br>0.03531500<br>F 2.94235000 -1.44507500 -<br>0.00184000                                                                                                                                                                                                                                                                                                                        | C 3.71244000 -1.39142800 -<br>0.05815700<br>H 3.16876900 -2.34329100 -<br>0.05867200<br>H 4.33199200 -1.31535300 -<br>0.95880300<br>H 4.33402800 -1.31352700<br>0.84094900                                                                                                                                                                                                                                                                                                                                      |
| <b>MeCl-MeCl</b><br>P 1.98647600 -0.35774600 -<br>0.08850700<br>O 1.16375600 -0.68479000 -<br>1.32748400<br>O 1.41347500 -0.87180500<br>1.31496200<br>H 0.40238400 -0.79285800<br>1.37392300<br>P -1.98647200 -0.35775400<br>0.08849800<br>O -1.16374800 -0.68473400<br>1.32748700<br>O -1.41346000 -0.87186800 -<br>1.31494700<br>H -0.40236400 -0.79293300 -<br>1.37390100<br>C 3.69298100 -0.94179000 -<br>0.13186100<br>H 3.67020400 -2.03606600 -<br>0.20664100<br>H 4.18733000 -0.51240000 -<br>1.00984600 | <b>MeCl-MeBr</b><br>P 2.29388500 -0.43238100 -<br>0.06665400<br>O 1.38706800 -0.41403300 -<br>1.29047000<br>O 1.57821800 -0.52977700<br>1.36143700<br>H 0.71310600 0.00310100<br>1.39969000<br>P -1.51556600 0.82152200<br>0.07462500<br>O -0.60971900 0.83793000<br>1.30121200<br>O -0.79763400 0.95446800 -<br>1.35142700<br>H 0.06993700 0.42519800 -<br>1.39375300<br>C -2.79215200 2.09970200<br>0.06365100<br>H -3.40967600 1.98474700<br>0.96068600<br>H -2.28596200 3.07336400<br>0.07118200 | <b>MeBr-MeBr</b><br>P 1.97737200 -0.83669500 -<br>0.15661900<br>O 1.11856200 -1.16834300 -<br>1.37156200<br>O 1.45740500 -1.37538100<br>1.26078500<br>H 0.45088300 -1.28797800<br>1.36164400<br>P -1.97740300 -0.83669900<br>0.15666600<br>O -1.11869200 -1.16789800<br>1.37182400<br>O -1.45746400 -1.37591100 -<br>1.26055100<br>H -0.45107400 -1.28783900 -<br>1.36181300<br>Br -2.15122500 1.40448200 -<br>0.07613500<br>Br 2.15145800 1.40453900<br>0.07559000<br>C 3.68799500 -1.40914300 -<br>0.25930700 |

|                                           |                                            |                                           |
|-------------------------------------------|--------------------------------------------|-------------------------------------------|
| H 4.20273000 -0.63149800<br>0.78655000    | H -3.40078800 1.99056400 -<br>0.84020200   | H 3.66828600 -2.50348100 -<br>0.33870400  |
| C -3.69297400 -0.94180800<br>0.13187700   | Br -2.66847800 -1.12329100 -<br>0.00660600 | H 4.14963700 -0.97109000 -<br>1.15052700  |
| H -3.67019000 -2.03608100<br>0.20671000   | C 3.52466600 -1.75130900 -<br>0.05736200   | H 4.22403500 -1.09910300<br>0.64396200    |
| H -4.18733400 -0.51237800<br>1.00983600   | H 2.98743300 -2.70782500 -<br>0.06367000   | C -3.68804200 -1.40909000<br>0.25933500   |
| H -4.20271800 -0.63156600 -<br>0.78655300 | H 4.14421200 -1.65870100 -<br>0.95575500   | H -3.66835000 -2.50339500<br>0.33919700   |
| Cl 2.16658500 1.71361800<br>0.11494400    | H 4.13929900 -1.66394900<br>0.84492900     | H -4.14981700 -0.97069500<br>1.15032000   |
| Cl -2.16660500 1.71360100 -<br>0.11504600 | Cl 3.42979500 1.32102300<br>0.00315100     | H -4.22394900 -1.09941200 -<br>0.64413400 |
